# Supplementary material for: Machine learning of isomerization in porous molecular frameworks: exploring functional group pair distance distributions
Source: Royal Society of Chemistry journal article supplement (doi:10.1039/d3qi01065a), 2023-01-01
Supplement: d3qi01065a3.xlsx [file d3qi01065a3.xlsx]

## Sheet: all_isomer_data
									Atom 1		Atom 2		Atom 3		Atom 4
Isomer no.	Indices				Atom indices (1 indexed)				x	y	x	y	x	y	x	y	Inter-FG distances						no. of inside N	unique?	First unique index					Inter-FG distances sorted
0	1	1	1	1	1	5	9	13	1.43356	-3.9118	3.9118	1.43356	-1.43356	3.9118	-3.9118	-1.43356	5.8919	8.3324	5.8919	5.8919	8.3324	5.8919	4	1	0					5.8919	5.8919	5.8919	5.8919	8.3324	8.3324
1	1	1	1	2	1	5	9	14	1.43356	-3.9118	3.9118	1.43356	-1.43356	3.9118	-3.9118	1.43356	5.8919	8.3324	7.55947	5.8919	7.82359	3.50476	4	1	1					3.50476	5.8919	5.8919	7.55947	7.82359	8.3324
2	1	1	1	3	1	5	9	15	1.43356	-3.9118	3.9118	1.43356	-1.43356	3.9118	-8.87524	1.42963	5.8919	8.3324	11.6104	5.8919	12.787	7.84473	3	1	2					5.8919	5.8919	7.84473	8.3324	11.6104	12.787
3	1	1	1	4	1	5	9	16	1.43356	-3.9118	3.9118	1.43356	-1.43356	3.9118	-8.87524	-1.42963	5.8919	8.3324	10.6034	5.8919	13.1037	9.16021	3	1	3					5.8919	5.8919	8.3324	9.16021	10.6034	13.1037
4	1	1	2	1	1	5	10	13	1.43356	-3.9118	3.9118	1.43356	1.43356	3.9118	-3.9118	-1.43356	5.8919	7.82359	5.8919	3.50476	8.3324	7.55947	4	0	1					3.50476	5.8919	5.8919	7.55947	7.82359	8.3324
5	1	1	2	2	1	5	10	14	1.43356	-3.9118	3.9118	1.43356	1.43356	3.9118	-3.9118	1.43356	5.8919	7.82359	7.55947	3.50476	7.82359	5.8919	4	1	5					3.50476	5.8919	5.8919	7.55947	7.82359	7.82359
6	1	1	2	3	1	5	10	15	1.43356	-3.9118	3.9118	1.43356	1.43356	3.9118	-8.87524	1.42963	5.8919	7.82359	11.6104	3.50476	12.787	10.6034	3	1	6					3.50476	5.8919	7.82359	10.6034	11.6104	12.787
7	1	1	2	4	1	5	10	16	1.43356	-3.9118	3.9118	1.43356	1.43356	3.9118	-8.87524	-1.42963	5.8919	7.82359	10.6034	3.50476	13.1037	11.6104	3	1	7					3.50476	5.8919	7.82359	10.6034	11.6104	13.1037
8	1	1	3	1	1	5	11	13	1.43356	-3.9118	3.9118	1.43356	1.42963	8.87524	-3.9118	-1.43356	5.8919	12.787	5.8919	7.84473	8.3324	11.6104	3	0	2					5.8919	5.8919	7.84473	8.3324	11.6104	12.787
9	1	1	3	2	1	5	11	14	1.43356	-3.9118	3.9118	1.43356	1.42963	8.87524	-3.9118	1.43356	5.8919	12.787	7.55947	7.84473	7.82359	9.16021	3	1	9					5.8919	7.55947	7.82359	7.84473	9.16021	12.787
10	1	1	3	3	1	5	11	15	1.43356	-3.9118	3.9118	1.43356	1.42963	8.87524	-8.87524	1.42963	5.8919	12.787	11.6104	7.84473	12.787	12.7133	2	1	10					5.8919	7.84473	11.6104	12.7133	12.787	12.787		63.6344
11	1	1	3	4	1	5	11	16	1.43356	-3.9118	3.9118	1.43356	1.42963	8.87524	-8.87524	-1.42963	5.8919	12.787	10.6034	7.84473	13.1037	14.5733	2	1	11					5.8919	7.84473	10.6034	12.787	13.1037	14.5733		64.8041
12	1	1	4	1	1	5	12	13	1.43356	-3.9118	3.9118	1.43356	-1.42963	8.87524	-3.9118	-1.43356	5.8919	13.1037	5.8919	9.16021	8.3324	10.6034	3	0	3					5.8919	5.8919	8.3324	9.16021	10.6034	13.1037
13	1	1	4	2	1	5	12	14	1.43356	-3.9118	3.9118	1.43356	-1.42963	8.87524	-3.9118	1.43356	5.8919	13.1037	7.55947	9.16021	7.82359	7.84473	3	1	13					5.8919	7.55947	7.82359	7.84473	9.16021	13.1037
14	1	1	4	3	1	5	12	15	1.43356	-3.9118	3.9118	1.43356	-1.42963	8.87524	-8.87524	1.42963	5.8919	13.1037	11.6104	9.16021	12.787	10.5297	2	1	14					5.8919	9.16021	10.5297	11.6104	12.787	13.1037		63.0829
15	1	1	4	4	1	5	12	16	1.43356	-3.9118	3.9118	1.43356	-1.42963	8.87524	-8.87524	-1.42963	5.8919	13.1037	10.6034	9.16021	13.1037	12.7133	2	1	15					5.8919	9.16021	10.6034	12.7133	13.1037	13.1037		64.5762
16	1	2	1	1	1	6	9	13	1.43356	-3.9118	3.9118	-1.43356	-1.43356	3.9118	-3.9118	-1.43356	3.50476	8.3324	5.8919	7.55947	7.82359	5.8919	4	0	1					3.50476	5.8919	5.8919	7.55947	7.82359	8.3324
17	1	2	1	2	1	6	9	14	1.43356	-3.9118	3.9118	-1.43356	-1.43356	3.9118	-3.9118	1.43356	3.50476	8.3324	7.55947	7.55947	8.3324	3.50476	4	1	17					3.50476	3.50476	7.55947	7.55947	8.3324	8.3324
18	1	2	1	3	1	6	9	15	1.43356	-3.9118	3.9118	-1.43356	-1.43356	3.9118	-8.87524	1.42963	3.50476	8.3324	11.6104	7.55947	13.1037	7.84473	3	1	18					3.50476	7.55947	7.84473	8.3324	11.6104	13.1037
19	1	2	1	4	1	6	9	16	1.43356	-3.9118	3.9118	-1.43356	-1.43356	3.9118	-8.87524	-1.42963	3.50476	8.3324	10.6034	7.55947	12.787	9.16021	3	1	19					3.50476	7.55947	8.3324	9.16021	10.6034	12.787
20	1	2	2	1	1	6	10	13	1.43356	-3.9118	3.9118	-1.43356	1.43356	3.9118	-3.9118	-1.43356	3.50476	7.82359	5.8919	5.8919	7.82359	7.55947	4	0	5					3.50476	5.8919	5.8919	7.55947	7.82359	7.82359
21	1	2	2	2	1	6	10	14	1.43356	-3.9118	3.9118	-1.43356	1.43356	3.9118	-3.9118	1.43356	3.50476	7.82359	7.55947	5.8919	8.3324	5.8919	4	0	1					3.50476	5.8919	5.8919	7.55947	7.82359	8.3324
22	1	2	2	3	1	6	10	15	1.43356	-3.9118	3.9118	-1.43356	1.43356	3.9118	-8.87524	1.42963	3.50476	7.82359	11.6104	5.8919	13.1037	10.6034	3	0	7					3.50476	5.8919	7.82359	10.6034	11.6104	13.1037
23	1	2	2	4	1	6	10	16	1.43356	-3.9118	3.9118	-1.43356	1.43356	3.9118	-8.87524	-1.42963	3.50476	7.82359	10.6034	5.8919	12.787	11.6104	3	0	6					3.50476	5.8919	7.82359	10.6034	11.6104	12.787
24	1	2	3	1	1	6	11	13	1.43356	-3.9118	3.9118	-1.43356	1.42963	8.87524	-3.9118	-1.43356	3.50476	12.787	5.8919	10.6034	7.82359	11.6104	3	0	6					3.50476	5.8919	7.82359	10.6034	11.6104	12.787
25	1	2	3	2	1	6	11	14	1.43356	-3.9118	3.9118	-1.43356	1.42963	8.87524	-3.9118	1.43356	3.50476	12.787	7.55947	10.6034	8.3324	9.16021	3	0	19					3.50476	7.55947	8.3324	9.16021	10.6034	12.787
26	1	2	3	3	1	6	11	15	1.43356	-3.9118	3.9118	-1.43356	1.42963	8.87524	-8.87524	1.42963	3.50476	12.787	11.6104	10.6034	13.1037	12.7133	2	1	26					3.50476	10.6034	11.6104	12.7133	12.787	13.1037		64.3226
27	1	2	3	4	1	6	11	16	1.43356	-3.9118	3.9118	-1.43356	1.42963	8.87524	-8.87524	-1.42963	3.50476	12.787	10.6034	10.6034	12.787	14.5733	2	1	27					3.50476	10.6034	10.6034	12.787	12.787	14.5733		64.859
28	1	2	4	1	1	6	12	13	1.43356	-3.9118	3.9118	-1.43356	-1.42963	8.87524	-3.9118	-1.43356	3.50476	13.1037	5.8919	11.6104	7.82359	10.6034	3	0	7					3.50476	5.8919	7.82359	10.6034	11.6104	13.1037
29	1	2	4	2	1	6	12	14	1.43356	-3.9118	3.9118	-1.43356	-1.42963	8.87524	-3.9118	1.43356	3.50476	13.1037	7.55947	11.6104	8.3324	7.84473	3	0	18					3.50476	7.55947	7.84473	8.3324	11.6104	13.1037
30	1	2	4	3	1	6	12	15	1.43356	-3.9118	3.9118	-1.43356	-1.42963	8.87524	-8.87524	1.42963	3.50476	13.1037	11.6104	11.6104	13.1037	10.5297	2	1	30					3.50476	10.5297	11.6104	11.6104	13.1037	13.1037		63.4627
31	1	2	4	4	1	6	12	16	1.43356	-3.9118	3.9118	-1.43356	-1.42963	8.87524	-8.87524	-1.42963	3.50476	13.1037	10.6034	11.6104	12.787	12.7133	2	0	26					3.50476	10.6034	11.6104	12.7133	12.787	13.1037		64.3226
32	1	3	1	1	1	7	9	13	1.43356	-3.9118	8.87524	-1.42963	-1.43356	3.9118	-3.9118	-1.43356	7.84473	8.3324	5.8919	11.6104	12.787	5.8919	3	0	2					5.8919	5.8919	7.84473	8.3324	11.6104	12.787
33	1	3	1	2	1	7	9	14	1.43356	-3.9118	8.87524	-1.42963	-1.43356	3.9118	-3.9118	1.43356	7.84473	8.3324	7.55947	11.6104	13.1037	3.50476	3	0	18					3.50476	7.55947	7.84473	8.3324	11.6104	13.1037
34	1	3	1	3	1	7	9	15	1.43356	-3.9118	8.87524	-1.42963	-1.43356	3.9118	-8.87524	1.42963	7.84473	8.3324	11.6104	11.6104	17.9793	7.84473	2	1	34					7.84473	7.84473	8.3324	11.6104	11.6104	17.9793		65.222
35	1	3	1	4	1	7	9	16	1.43356	-3.9118	8.87524	-1.42963	-1.43356	3.9118	-8.87524	-1.42963	7.84473	8.3324	10.6034	11.6104	17.7505	9.16021	2	1	35					7.84473	8.3324	9.16021	10.6034	11.6104	17.7505		65.3017
36	1	3	2	1	1	7	10	13	1.43356	-3.9118	8.87524	-1.42963	1.43356	3.9118	-3.9118	-1.43356	7.84473	7.82359	5.8919	9.16021	12.787	7.55947	3	0	9					5.8919	7.55947	7.82359	7.84473	9.16021	12.787
37	1	3	2	2	1	7	10	14	1.43356	-3.9118	8.87524	-1.42963	1.43356	3.9118	-3.9118	1.43356	7.84473	7.82359	7.55947	9.16021	13.1037	5.8919	3	0	13					5.8919	7.55947	7.82359	7.84473	9.16021	13.1037
38	1	3	2	3	1	7	10	15	1.43356	-3.9118	8.87524	-1.42963	1.43356	3.9118	-8.87524	1.42963	7.84473	7.82359	11.6104	9.16021	17.9793	10.6034	2	1	38					7.82359	7.84473	9.16021	10.6034	11.6104	17.9793		65.0217
39	1	3	2	4	1	7	10	16	1.43356	-3.9118	8.87524	-1.42963	1.43356	3.9118	-8.87524	-1.42963	7.84473	7.82359	10.6034	9.16021	17.7505	11.6104	2	1	39					7.82359	7.84473	9.16021	10.6034	11.6104	17.7505		64.7929
40	1	3	3	1	1	7	11	13	1.43356	-3.9118	8.87524	-1.42963	1.42963	8.87524	-3.9118	-1.43356	7.84473	12.787	5.8919	12.7133	12.787	11.6104	2	0	10					5.8919	7.84473	11.6104	12.7133	12.787	12.787		63.6344
41	1	3	3	2	1	7	11	14	1.43356	-3.9118	8.87524	-1.42963	1.42963	8.87524	-3.9118	1.43356	7.84473	12.787	7.55947	12.7133	13.1037	9.16021	2	1	41					7.55947	7.84473	9.16021	12.7133	12.787	13.1037		63.1684
42	1	3	3	3	1	7	11	15	1.43356	-3.9118	8.87524	-1.42963	1.42963	8.87524	-8.87524	1.42963	7.84473	12.787	11.6104	12.7133	17.9793	12.7133	1	1	42					7.84473	11.6104	12.7133	12.7133	12.787	17.9793
43	1	3	3	4	1	7	11	16	1.43356	-3.9118	8.87524	-1.42963	1.42963	8.87524	-8.87524	-1.42963	7.84473	12.787	10.6034	12.7133	17.7505	14.5733	1	1	43					7.84473	10.6034	12.7133	12.787	14.5733	17.7505
44	1	3	4	1	1	7	12	13	1.43356	-3.9118	8.87524	-1.42963	-1.42963	8.87524	-3.9118	-1.43356	7.84473	13.1037	5.8919	14.5733	12.787	10.6034	2	0	11					5.8919	7.84473	10.6034	12.787	13.1037	14.5733		64.8041
45	1	3	4	2	1	7	12	14	1.43356	-3.9118	8.87524	-1.42963	-1.42963	8.87524	-3.9118	1.43356	7.84473	13.1037	7.55947	14.5733	13.1037	7.84473	2	1	45					7.55947	7.84473	7.84473	13.1037	13.1037	14.5733		64.0296
46	1	3	4	3	1	7	12	15	1.43356	-3.9118	8.87524	-1.42963	-1.42963	8.87524	-8.87524	1.42963	7.84473	13.1037	11.6104	14.5733	17.9793	10.5297	1	1	46					7.84473	10.5297	11.6104	13.1037	14.5733	17.9793
47	1	3	4	4	1	7	12	16	1.43356	-3.9118	8.87524	-1.42963	-1.42963	8.87524	-8.87524	-1.42963	7.84473	13.1037	10.6034	14.5733	17.7505	12.7133	1	1	47					7.84473	10.6034	12.7133	13.1037	14.5733	17.7505
48	1	4	1	1	1	8	9	13	1.43356	-3.9118	8.87524	1.42963	-1.43356	3.9118	-3.9118	-1.43356	9.16021	8.3324	5.8919	10.6034	13.1037	5.8919	3	0	3					5.8919	5.8919	8.3324	9.16021	10.6034	13.1037
49	1	4	1	2	1	8	9	14	1.43356	-3.9118	8.87524	1.42963	-1.43356	3.9118	-3.9118	1.43356	9.16021	8.3324	7.55947	10.6034	12.787	3.50476	3	0	19					3.50476	7.55947	8.3324	9.16021	10.6034	12.787
50	1	4	1	3	1	8	9	15	1.43356	-3.9118	8.87524	1.42963	-1.43356	3.9118	-8.87524	1.42963	9.16021	8.3324	11.6104	10.6034	17.7505	7.84473	2	0	35					7.84473	8.3324	9.16021	10.6034	11.6104	17.7505		65.3017
51	1	4	1	4	1	8	9	16	1.43356	-3.9118	8.87524	1.42963	-1.43356	3.9118	-8.87524	-1.42963	9.16021	8.3324	10.6034	10.6034	17.9793	9.16021	2	1	51					8.3324	9.16021	9.16021	10.6034	10.6034	17.9793		65.839
52	1	4	2	1	1	8	10	13	1.43356	-3.9118	8.87524	1.42963	1.43356	3.9118	-3.9118	-1.43356	9.16021	7.82359	5.8919	7.84473	13.1037	7.55947	3	0	13					5.8919	7.55947	7.82359	7.84473	9.16021	13.1037
53	1	4	2	2	1	8	10	14	1.43356	-3.9118	8.87524	1.42963	1.43356	3.9118	-3.9118	1.43356	9.16021	7.82359	7.55947	7.84473	12.787	5.8919	3	0	9					5.8919	7.55947	7.82359	7.84473	9.16021	12.787
54	1	4	2	3	1	8	10	15	1.43356	-3.9118	8.87524	1.42963	1.43356	3.9118	-8.87524	1.42963	9.16021	7.82359	11.6104	7.84473	17.7505	10.6034	2	0	39					7.82359	7.84473	9.16021	10.6034	11.6104	17.7505		64.7929
55	1	4	2	4	1	8	10	16	1.43356	-3.9118	8.87524	1.42963	1.43356	3.9118	-8.87524	-1.42963	9.16021	7.82359	10.6034	7.84473	17.9793	11.6104	2	0	38					7.82359	7.84473	9.16021	10.6034	11.6104	17.9793		65.0217
56	1	4	3	1	1	8	11	13	1.43356	-3.9118	8.87524	1.42963	1.42963	8.87524	-3.9118	-1.43356	9.16021	12.787	5.8919	10.5297	13.1037	11.6104	2	0	14					5.8919	9.16021	10.5297	11.6104	12.787	13.1037		63.0829
57	1	4	3	2	1	8	11	14	1.43356	-3.9118	8.87524	1.42963	1.42963	8.87524	-3.9118	1.43356	9.16021	12.787	7.55947	10.5297	12.787	9.16021	2	1	57					7.55947	9.16021	9.16021	10.5297	12.787	12.787		61.9837
58	1	4	3	3	1	8	11	15	1.43356	-3.9118	8.87524	1.42963	1.42963	8.87524	-8.87524	1.42963	9.16021	12.787	11.6104	10.5297	17.7505	12.7133	1	1	58					9.16021	10.5297	11.6104	12.7133	12.787	17.7505
59	1	4	3	4	1	8	11	16	1.43356	-3.9118	8.87524	1.42963	1.42963	8.87524	-8.87524	-1.42963	9.16021	12.787	10.6034	10.5297	17.9793	14.5733	1	1	59					9.16021	10.5297	10.6034	12.787	14.5733	17.9793
60	1	4	4	1	1	8	12	13	1.43356	-3.9118	8.87524	1.42963	-1.42963	8.87524	-3.9118	-1.43356	9.16021	13.1037	5.8919	12.7133	13.1037	10.6034	2	0	15					5.8919	9.16021	10.6034	12.7133	13.1037	13.1037		64.5762
61	1	4	4	2	1	8	12	14	1.43356	-3.9118	8.87524	1.42963	-1.42963	8.87524	-3.9118	1.43356	9.16021	13.1037	7.55947	12.7133	12.787	7.84473	2	0	41					7.55947	7.84473	9.16021	12.7133	12.787	13.1037		63.1684
62	1	4	4	3	1	8	12	15	1.43356	-3.9118	8.87524	1.42963	-1.42963	8.87524	-8.87524	1.42963	9.16021	13.1037	11.6104	12.7133	17.7505	10.5297	1	1	62					9.16021	10.5297	11.6104	12.7133	13.1037	17.7505
63	1	4	4	4	1	8	12	16	1.43356	-3.9118	8.87524	1.42963	-1.42963	8.87524	-8.87524	-1.42963	9.16021	13.1037	10.6034	12.7133	17.9793	12.7133	1	1	63					9.16021	10.6034	12.7133	12.7133	13.1037	17.9793
64	2	1	1	1	2	5	9	13	-1.43356	-3.9118	3.9118	1.43356	-1.43356	3.9118	-3.9118	-1.43356	7.55947	7.82359	3.50476	5.8919	8.3324	5.8919	4	0	1					3.50476	5.8919	5.8919	7.55947	7.82359	8.3324
65	2	1	1	2	2	5	9	14	-1.43356	-3.9118	3.9118	1.43356	-1.43356	3.9118	-3.9118	1.43356	7.55947	7.82359	5.8919	5.8919	7.82359	3.50476	4	0	5					3.50476	5.8919	5.8919	7.55947	7.82359	7.82359
66	2	1	1	3	2	5	9	15	-1.43356	-3.9118	3.9118	1.43356	-1.43356	3.9118	-8.87524	1.42963	7.55947	7.82359	9.16021	5.8919	12.787	7.84473	3	0	9					5.8919	7.55947	7.82359	7.84473	9.16021	12.787
67	2	1	1	4	2	5	9	16	-1.43356	-3.9118	3.9118	1.43356	-1.43356	3.9118	-8.87524	-1.42963	7.55947	7.82359	7.84473	5.8919	13.1037	9.16021	3	0	13					5.8919	7.55947	7.82359	7.84473	9.16021	13.1037
68	2	1	2	1	2	5	10	13	-1.43356	-3.9118	3.9118	1.43356	1.43356	3.9118	-3.9118	-1.43356	7.55947	8.3324	3.50476	3.50476	8.3324	7.55947	4	0	17					3.50476	3.50476	7.55947	7.55947	8.3324	8.3324
69	2	1	2	2	2	5	10	14	-1.43356	-3.9118	3.9118	1.43356	1.43356	3.9118	-3.9118	1.43356	7.55947	8.3324	5.8919	3.50476	7.82359	5.8919	4	0	1					3.50476	5.8919	5.8919	7.55947	7.82359	8.3324
70	2	1	2	3	2	5	10	15	-1.43356	-3.9118	3.9118	1.43356	1.43356	3.9118	-8.87524	1.42963	7.55947	8.3324	9.16021	3.50476	12.787	10.6034	3	0	19					3.50476	7.55947	8.3324	9.16021	10.6034	12.787
71	2	1	2	4	2	5	10	16	-1.43356	-3.9118	3.9118	1.43356	1.43356	3.9118	-8.87524	-1.42963	7.55947	8.3324	7.84473	3.50476	13.1037	11.6104	3	0	18					3.50476	7.55947	7.84473	8.3324	11.6104	13.1037
72	2	1	3	1	2	5	11	13	-1.43356	-3.9118	3.9118	1.43356	1.42963	8.87524	-3.9118	-1.43356	7.55947	13.1037	3.50476	7.84473	8.3324	11.6104	3	0	18					3.50476	7.55947	7.84473	8.3324	11.6104	13.1037
73	2	1	3	2	2	5	11	14	-1.43356	-3.9118	3.9118	1.43356	1.42963	8.87524	-3.9118	1.43356	7.55947	13.1037	5.8919	7.84473	7.82359	9.16021	3	0	13					5.8919	7.55947	7.82359	7.84473	9.16021	13.1037
74	2	1	3	3	2	5	11	15	-1.43356	-3.9118	3.9118	1.43356	1.42963	8.87524	-8.87524	1.42963	7.55947	13.1037	9.16021	7.84473	12.787	12.7133	2	0	41					7.55947	7.84473	9.16021	12.7133	12.787	13.1037		63.1684
75	2	1	3	4	2	5	11	16	-1.43356	-3.9118	3.9118	1.43356	1.42963	8.87524	-8.87524	-1.42963	7.55947	13.1037	7.84473	7.84473	13.1037	14.5733	2	0	45					7.55947	7.84473	7.84473	13.1037	13.1037	14.5733		64.0296
76	2	1	4	1	2	5	12	13	-1.43356	-3.9118	3.9118	1.43356	-1.42963	8.87524	-3.9118	-1.43356	7.55947	12.787	3.50476	9.16021	8.3324	10.6034	3	0	19					3.50476	7.55947	8.3324	9.16021	10.6034	12.787
77	2	1	4	2	2	5	12	14	-1.43356	-3.9118	3.9118	1.43356	-1.42963	8.87524	-3.9118	1.43356	7.55947	12.787	5.8919	9.16021	7.82359	7.84473	3	0	9					5.8919	7.55947	7.82359	7.84473	9.16021	12.787
78	2	1	4	3	2	5	12	15	-1.43356	-3.9118	3.9118	1.43356	-1.42963	8.87524	-8.87524	1.42963	7.55947	12.787	9.16021	9.16021	12.787	10.5297	2	0	57					7.55947	9.16021	9.16021	10.5297	12.787	12.787		61.9837
79	2	1	4	4	2	5	12	16	-1.43356	-3.9118	3.9118	1.43356	-1.42963	8.87524	-8.87524	-1.42963	7.55947	12.787	7.84473	9.16021	13.1037	12.7133	2	0	41					7.55947	7.84473	9.16021	12.7133	12.787	13.1037		63.1684
80	2	2	1	1	2	6	9	13	-1.43356	-3.9118	3.9118	-1.43356	-1.43356	3.9118	-3.9118	-1.43356	5.8919	7.82359	3.50476	7.55947	7.82359	5.8919	4	0	5					3.50476	5.8919	5.8919	7.55947	7.82359	7.82359
81	2	2	1	2	2	6	9	14	-1.43356	-3.9118	3.9118	-1.43356	-1.43356	3.9118	-3.9118	1.43356	5.8919	7.82359	5.8919	7.55947	8.3324	3.50476	4	0	1					3.50476	5.8919	5.8919	7.55947	7.82359	8.3324
82	2	2	1	3	2	6	9	15	-1.43356	-3.9118	3.9118	-1.43356	-1.43356	3.9118	-8.87524	1.42963	5.8919	7.82359	9.16021	7.55947	13.1037	7.84473	3	0	13					5.8919	7.55947	7.82359	7.84473	9.16021	13.1037
83	2	2	1	4	2	6	9	16	-1.43356	-3.9118	3.9118	-1.43356	-1.43356	3.9118	-8.87524	-1.42963	5.8919	7.82359	7.84473	7.55947	12.787	9.16021	3	0	9					5.8919	7.55947	7.82359	7.84473	9.16021	12.787
84	2	2	2	1	2	6	10	13	-1.43356	-3.9118	3.9118	-1.43356	1.43356	3.9118	-3.9118	-1.43356	5.8919	8.3324	3.50476	5.8919	7.82359	7.55947	4	0	1					3.50476	5.8919	5.8919	7.55947	7.82359	8.3324
85	2	2	2	2	2	6	10	14	-1.43356	-3.9118	3.9118	-1.43356	1.43356	3.9118	-3.9118	1.43356	5.8919	8.3324	5.8919	5.8919	8.3324	5.8919	4	0	0					5.8919	5.8919	5.8919	5.8919	8.3324	8.3324
86	2	2	2	3	2	6	10	15	-1.43356	-3.9118	3.9118	-1.43356	1.43356	3.9118	-8.87524	1.42963	5.8919	8.3324	9.16021	5.8919	13.1037	10.6034	3	0	3					5.8919	5.8919	8.3324	9.16021	10.6034	13.1037
87	2	2	2	4	2	6	10	16	-1.43356	-3.9118	3.9118	-1.43356	1.43356	3.9118	-8.87524	-1.42963	5.8919	8.3324	7.84473	5.8919	12.787	11.6104	3	0	2					5.8919	5.8919	7.84473	8.3324	11.6104	12.787
88	2	2	3	1	2	6	11	13	-1.43356	-3.9118	3.9118	-1.43356	1.42963	8.87524	-3.9118	-1.43356	5.8919	13.1037	3.50476	10.6034	7.82359	11.6104	3	0	7					3.50476	5.8919	7.82359	10.6034	11.6104	13.1037
89	2	2	3	2	2	6	11	14	-1.43356	-3.9118	3.9118	-1.43356	1.42963	8.87524	-3.9118	1.43356	5.8919	13.1037	5.8919	10.6034	8.3324	9.16021	3	0	3					5.8919	5.8919	8.3324	9.16021	10.6034	13.1037
90	2	2	3	3	2	6	11	15	-1.43356	-3.9118	3.9118	-1.43356	1.42963	8.87524	-8.87524	1.42963	5.8919	13.1037	9.16021	10.6034	13.1037	12.7133	2	0	15					5.8919	9.16021	10.6034	12.7133	13.1037	13.1037		64.5762
91	2	2	3	4	2	6	11	16	-1.43356	-3.9118	3.9118	-1.43356	1.42963	8.87524	-8.87524	-1.42963	5.8919	13.1037	7.84473	10.6034	12.787	14.5733	2	0	11					5.8919	7.84473	10.6034	12.787	13.1037	14.5733		64.8041
92	2	2	4	1	2	6	12	13	-1.43356	-3.9118	3.9118	-1.43356	-1.42963	8.87524	-3.9118	-1.43356	5.8919	12.787	3.50476	11.6104	7.82359	10.6034	3	0	6					3.50476	5.8919	7.82359	10.6034	11.6104	12.787
93	2	2	4	2	2	6	12	14	-1.43356	-3.9118	3.9118	-1.43356	-1.42963	8.87524	-3.9118	1.43356	5.8919	12.787	5.8919	11.6104	8.3324	7.84473	3	0	2					5.8919	5.8919	7.84473	8.3324	11.6104	12.787
94	2	2	4	3	2	6	12	15	-1.43356	-3.9118	3.9118	-1.43356	-1.42963	8.87524	-8.87524	1.42963	5.8919	12.787	9.16021	11.6104	13.1037	10.5297	2	0	14					5.8919	9.16021	10.5297	11.6104	12.787	13.1037		63.0829
95	2	2	4	4	2	6	12	16	-1.43356	-3.9118	3.9118	-1.43356	-1.42963	8.87524	-8.87524	-1.42963	5.8919	12.787	7.84473	11.6104	12.787	12.7133	2	0	10					5.8919	7.84473	11.6104	12.7133	12.787	12.787		63.6344
96	2	3	1	1	2	7	9	13	-1.43356	-3.9118	8.87524	-1.42963	-1.43356	3.9118	-3.9118	-1.43356	10.6034	7.82359	3.50476	11.6104	12.787	5.8919	3	0	6					3.50476	5.8919	7.82359	10.6034	11.6104	12.787
97	2	3	1	2	2	7	9	14	-1.43356	-3.9118	8.87524	-1.42963	-1.43356	3.9118	-3.9118	1.43356	10.6034	7.82359	5.8919	11.6104	13.1037	3.50476	3	0	7					3.50476	5.8919	7.82359	10.6034	11.6104	13.1037
98	2	3	1	3	2	7	9	15	-1.43356	-3.9118	8.87524	-1.42963	-1.43356	3.9118	-8.87524	1.42963	10.6034	7.82359	9.16021	11.6104	17.9793	7.84473	2	0	38					7.82359	7.84473	9.16021	10.6034	11.6104	17.9793		65.0217
99	2	3	1	4	2	7	9	16	-1.43356	-3.9118	8.87524	-1.42963	-1.43356	3.9118	-8.87524	-1.42963	10.6034	7.82359	7.84473	11.6104	17.7505	9.16021	2	0	39					7.82359	7.84473	9.16021	10.6034	11.6104	17.7505		64.7929
100	2	3	2	1	2	7	10	13	-1.43356	-3.9118	8.87524	-1.42963	1.43356	3.9118	-3.9118	-1.43356	10.6034	8.3324	3.50476	9.16021	12.787	7.55947	3	0	19					3.50476	7.55947	8.3324	9.16021	10.6034	12.787
101	2	3	2	2	2	7	10	14	-1.43356	-3.9118	8.87524	-1.42963	1.43356	3.9118	-3.9118	1.43356	10.6034	8.3324	5.8919	9.16021	13.1037	5.8919	3	0	3					5.8919	5.8919	8.3324	9.16021	10.6034	13.1037
102	2	3	2	3	2	7	10	15	-1.43356	-3.9118	8.87524	-1.42963	1.43356	3.9118	-8.87524	1.42963	10.6034	8.3324	9.16021	9.16021	17.9793	10.6034	2	0	51					8.3324	9.16021	9.16021	10.6034	10.6034	17.9793		65.839
103	2	3	2	4	2	7	10	16	-1.43356	-3.9118	8.87524	-1.42963	1.43356	3.9118	-8.87524	-1.42963	10.6034	8.3324	7.84473	9.16021	17.7505	11.6104	2	0	35					7.84473	8.3324	9.16021	10.6034	11.6104	17.7505		65.3017
104	2	3	3	1	2	7	11	13	-1.43356	-3.9118	8.87524	-1.42963	1.42963	8.87524	-3.9118	-1.43356	10.6034	13.1037	3.50476	12.7133	12.787	11.6104	2	0	26					3.50476	10.6034	11.6104	12.7133	12.787	13.1037		64.3226
105	2	3	3	2	2	7	11	14	-1.43356	-3.9118	8.87524	-1.42963	1.42963	8.87524	-3.9118	1.43356	10.6034	13.1037	5.8919	12.7133	13.1037	9.16021	2	0	15					5.8919	9.16021	10.6034	12.7133	13.1037	13.1037		64.5762
106	2	3	3	3	2	7	11	15	-1.43356	-3.9118	8.87524	-1.42963	1.42963	8.87524	-8.87524	1.42963	10.6034	13.1037	9.16021	12.7133	17.9793	12.7133	1	0	63					9.16021	10.6034	12.7133	12.7133	13.1037	17.9793
107	2	3	3	4	2	7	11	16	-1.43356	-3.9118	8.87524	-1.42963	1.42963	8.87524	-8.87524	-1.42963	10.6034	13.1037	7.84473	12.7133	17.7505	14.5733	1	0	47					7.84473	10.6034	12.7133	13.1037	14.5733	17.7505
108	2	3	4	1	2	7	12	13	-1.43356	-3.9118	8.87524	-1.42963	-1.42963	8.87524	-3.9118	-1.43356	10.6034	12.787	3.50476	14.5733	12.787	10.6034	2	0	27					3.50476	10.6034	10.6034	12.787	12.787	14.5733		64.859
109	2	3	4	2	2	7	12	14	-1.43356	-3.9118	8.87524	-1.42963	-1.42963	8.87524	-3.9118	1.43356	10.6034	12.787	5.8919	14.5733	13.1037	7.84473	2	0	11					5.8919	7.84473	10.6034	12.787	13.1037	14.5733		64.8041
110	2	3	4	3	2	7	12	15	-1.43356	-3.9118	8.87524	-1.42963	-1.42963	8.87524	-8.87524	1.42963	10.6034	12.787	9.16021	14.5733	17.9793	10.5297	1	0	59					9.16021	10.5297	10.6034	12.787	14.5733	17.9793
111	2	3	4	4	2	7	12	16	-1.43356	-3.9118	8.87524	-1.42963	-1.42963	8.87524	-8.87524	-1.42963	10.6034	12.787	7.84473	14.5733	17.7505	12.7133	1	0	43					7.84473	10.6034	12.7133	12.787	14.5733	17.7505
112	2	4	1	1	2	8	9	13	-1.43356	-3.9118	8.87524	1.42963	-1.43356	3.9118	-3.9118	-1.43356	11.6104	7.82359	3.50476	10.6034	13.1037	5.8919	3	0	7					3.50476	5.8919	7.82359	10.6034	11.6104	13.1037
113	2	4	1	2	2	8	9	14	-1.43356	-3.9118	8.87524	1.42963	-1.43356	3.9118	-3.9118	1.43356	11.6104	7.82359	5.8919	10.6034	12.787	3.50476	3	0	6					3.50476	5.8919	7.82359	10.6034	11.6104	12.787
114	2	4	1	3	2	8	9	15	-1.43356	-3.9118	8.87524	1.42963	-1.43356	3.9118	-8.87524	1.42963	11.6104	7.82359	9.16021	10.6034	17.7505	7.84473	2	0	39					7.82359	7.84473	9.16021	10.6034	11.6104	17.7505		64.7929
115	2	4	1	4	2	8	9	16	-1.43356	-3.9118	8.87524	1.42963	-1.43356	3.9118	-8.87524	-1.42963	11.6104	7.82359	7.84473	10.6034	17.9793	9.16021	2	0	38					7.82359	7.84473	9.16021	10.6034	11.6104	17.9793		65.0217
116	2	4	2	1	2	8	10	13	-1.43356	-3.9118	8.87524	1.42963	1.43356	3.9118	-3.9118	-1.43356	11.6104	8.3324	3.50476	7.84473	13.1037	7.55947	3	0	18					3.50476	7.55947	7.84473	8.3324	11.6104	13.1037
117	2	4	2	2	2	8	10	14	-1.43356	-3.9118	8.87524	1.42963	1.43356	3.9118	-3.9118	1.43356	11.6104	8.3324	5.8919	7.84473	12.787	5.8919	3	0	2					5.8919	5.8919	7.84473	8.3324	11.6104	12.787
118	2	4	2	3	2	8	10	15	-1.43356	-3.9118	8.87524	1.42963	1.43356	3.9118	-8.87524	1.42963	11.6104	8.3324	9.16021	7.84473	17.7505	10.6034	2	0	35					7.84473	8.3324	9.16021	10.6034	11.6104	17.7505		65.3017
119	2	4	2	4	2	8	10	16	-1.43356	-3.9118	8.87524	1.42963	1.43356	3.9118	-8.87524	-1.42963	11.6104	8.3324	7.84473	7.84473	17.9793	11.6104	2	0	34					7.84473	7.84473	8.3324	11.6104	11.6104	17.9793		65.222
120	2	4	3	1	2	8	11	13	-1.43356	-3.9118	8.87524	1.42963	1.42963	8.87524	-3.9118	-1.43356	11.6104	13.1037	3.50476	10.5297	13.1037	11.6104	2	0	30					3.50476	10.5297	11.6104	11.6104	13.1037	13.1037		63.4627
121	2	4	3	2	2	8	11	14	-1.43356	-3.9118	8.87524	1.42963	1.42963	8.87524	-3.9118	1.43356	11.6104	13.1037	5.8919	10.5297	12.787	9.16021	2	0	14					5.8919	9.16021	10.5297	11.6104	12.787	13.1037		63.0829
122	2	4	3	3	2	8	11	15	-1.43356	-3.9118	8.87524	1.42963	1.42963	8.87524	-8.87524	1.42963	11.6104	13.1037	9.16021	10.5297	17.7505	12.7133	1	0	62					9.16021	10.5297	11.6104	12.7133	13.1037	17.7505
123	2	4	3	4	2	8	11	16	-1.43356	-3.9118	8.87524	1.42963	1.42963	8.87524	-8.87524	-1.42963	11.6104	13.1037	7.84473	10.5297	17.9793	14.5733	1	0	46					7.84473	10.5297	11.6104	13.1037	14.5733	17.9793
124	2	4	4	1	2	8	12	13	-1.43356	-3.9118	8.87524	1.42963	-1.42963	8.87524	-3.9118	-1.43356	11.6104	12.787	3.50476	12.7133	13.1037	10.6034	2	0	26					3.50476	10.6034	11.6104	12.7133	12.787	13.1037		64.3226
125	2	4	4	2	2	8	12	14	-1.43356	-3.9118	8.87524	1.42963	-1.42963	8.87524	-3.9118	1.43356	11.6104	12.787	5.8919	12.7133	12.787	7.84473	2	0	10					5.8919	7.84473	11.6104	12.7133	12.787	12.787		63.6344
126	2	4	4	3	2	8	12	15	-1.43356	-3.9118	8.87524	1.42963	-1.42963	8.87524	-8.87524	1.42963	11.6104	12.787	9.16021	12.7133	17.7505	10.5297	1	0	58					9.16021	10.5297	11.6104	12.7133	12.787	17.7505
127	2	4	4	4	2	8	12	16	-1.43356	-3.9118	8.87524	1.42963	-1.42963	8.87524	-8.87524	-1.42963	11.6104	12.787	7.84473	12.7133	17.9793	12.7133	1	0	42					7.84473	11.6104	12.7133	12.7133	12.787	17.9793
128	3	1	1	1	3	5	9	13	-1.42963	-8.87524	3.9118	1.43356	-1.43356	3.9118	-3.9118	-1.43356	11.6104	12.787	7.84473	5.8919	8.3324	5.8919	3	0	2					5.8919	5.8919	7.84473	8.3324	11.6104	12.787
129	3	1	1	2	3	5	9	14	-1.42963	-8.87524	3.9118	1.43356	-1.43356	3.9118	-3.9118	1.43356	11.6104	12.787	10.6034	5.8919	7.82359	3.50476	3	0	6					3.50476	5.8919	7.82359	10.6034	11.6104	12.787
130	3	1	1	3	3	5	9	15	-1.42963	-8.87524	3.9118	1.43356	-1.43356	3.9118	-8.87524	1.42963	11.6104	12.787	12.7133	5.8919	12.787	7.84473	2	0	10					5.8919	7.84473	11.6104	12.7133	12.787	12.787		63.6344
131	3	1	1	4	3	5	9	16	-1.42963	-8.87524	3.9118	1.43356	-1.43356	3.9118	-8.87524	-1.42963	11.6104	12.787	10.5297	5.8919	13.1037	9.16021	2	0	14					5.8919	9.16021	10.5297	11.6104	12.787	13.1037		63.0829
132	3	1	2	1	3	5	10	13	-1.42963	-8.87524	3.9118	1.43356	1.43356	3.9118	-3.9118	-1.43356	11.6104	13.1037	7.84473	3.50476	8.3324	7.55947	3	0	18					3.50476	7.55947	7.84473	8.3324	11.6104	13.1037
133	3	1	2	2	3	5	10	14	-1.42963	-8.87524	3.9118	1.43356	1.43356	3.9118	-3.9118	1.43356	11.6104	13.1037	10.6034	3.50476	7.82359	5.8919	3	0	7					3.50476	5.8919	7.82359	10.6034	11.6104	13.1037
134	3	1	2	3	3	5	10	15	-1.42963	-8.87524	3.9118	1.43356	1.43356	3.9118	-8.87524	1.42963	11.6104	13.1037	12.7133	3.50476	12.787	10.6034	2	0	26					3.50476	10.6034	11.6104	12.7133	12.787	13.1037		64.3226
135	3	1	2	4	3	5	10	16	-1.42963	-8.87524	3.9118	1.43356	1.43356	3.9118	-8.87524	-1.42963	11.6104	13.1037	10.5297	3.50476	13.1037	11.6104	2	0	30					3.50476	10.5297	11.6104	11.6104	13.1037	13.1037		63.4627
136	3	1	3	1	3	5	11	13	-1.42963	-8.87524	3.9118	1.43356	1.42963	8.87524	-3.9118	-1.43356	11.6104	17.9793	7.84473	7.84473	8.3324	11.6104	2	0	34					7.84473	7.84473	8.3324	11.6104	11.6104	17.9793		65.222
137	3	1	3	2	3	5	11	14	-1.42963	-8.87524	3.9118	1.43356	1.42963	8.87524	-3.9118	1.43356	11.6104	17.9793	10.6034	7.84473	7.82359	9.16021	2	0	38					7.82359	7.84473	9.16021	10.6034	11.6104	17.9793		65.0217
138	3	1	3	3	3	5	11	15	-1.42963	-8.87524	3.9118	1.43356	1.42963	8.87524	-8.87524	1.42963	11.6104	17.9793	12.7133	7.84473	12.787	12.7133	1	0	42					7.84473	11.6104	12.7133	12.7133	12.787	17.9793
139	3	1	3	4	3	5	11	16	-1.42963	-8.87524	3.9118	1.43356	1.42963	8.87524	-8.87524	-1.42963	11.6104	17.9793	10.5297	7.84473	13.1037	14.5733	1	0	46					7.84473	10.5297	11.6104	13.1037	14.5733	17.9793
140	3	1	4	1	3	5	12	13	-1.42963	-8.87524	3.9118	1.43356	-1.42963	8.87524	-3.9118	-1.43356	11.6104	17.7505	7.84473	9.16021	8.3324	10.6034	2	0	35					7.84473	8.3324	9.16021	10.6034	11.6104	17.7505		65.3017
141	3	1	4	2	3	5	12	14	-1.42963	-8.87524	3.9118	1.43356	-1.42963	8.87524	-3.9118	1.43356	11.6104	17.7505	10.6034	9.16021	7.82359	7.84473	2	0	39					7.82359	7.84473	9.16021	10.6034	11.6104	17.7505		64.7929
142	3	1	4	3	3	5	12	15	-1.42963	-8.87524	3.9118	1.43356	-1.42963	8.87524	-8.87524	1.42963	11.6104	17.7505	12.7133	9.16021	12.787	10.5297	1	0	58					9.16021	10.5297	11.6104	12.7133	12.787	17.7505
143	3	1	4	4	3	5	12	16	-1.42963	-8.87524	3.9118	1.43356	-1.42963	8.87524	-8.87524	-1.42963	11.6104	17.7505	10.5297	9.16021	13.1037	12.7133	1	0	62					9.16021	10.5297	11.6104	12.7133	13.1037	17.7505
144	3	2	1	1	3	6	9	13	-1.42963	-8.87524	3.9118	-1.43356	-1.43356	3.9118	-3.9118	-1.43356	9.16021	12.787	7.84473	7.55947	7.82359	5.8919	3	0	9					5.8919	7.55947	7.82359	7.84473	9.16021	12.787
145	3	2	1	2	3	6	9	14	-1.42963	-8.87524	3.9118	-1.43356	-1.43356	3.9118	-3.9118	1.43356	9.16021	12.787	10.6034	7.55947	8.3324	3.50476	3	0	19					3.50476	7.55947	8.3324	9.16021	10.6034	12.787
146	3	2	1	3	3	6	9	15	-1.42963	-8.87524	3.9118	-1.43356	-1.43356	3.9118	-8.87524	1.42963	9.16021	12.787	12.7133	7.55947	13.1037	7.84473	2	0	41					7.55947	7.84473	9.16021	12.7133	12.787	13.1037		63.1684
147	3	2	1	4	3	6	9	16	-1.42963	-8.87524	3.9118	-1.43356	-1.43356	3.9118	-8.87524	-1.42963	9.16021	12.787	10.5297	7.55947	12.787	9.16021	2	0	57					7.55947	9.16021	9.16021	10.5297	12.787	12.787		61.9837
148	3	2	2	1	3	6	10	13	-1.42963	-8.87524	3.9118	-1.43356	1.43356	3.9118	-3.9118	-1.43356	9.16021	13.1037	7.84473	5.8919	7.82359	7.55947	3	0	13					5.8919	7.55947	7.82359	7.84473	9.16021	13.1037
149	3	2	2	2	3	6	10	14	-1.42963	-8.87524	3.9118	-1.43356	1.43356	3.9118	-3.9118	1.43356	9.16021	13.1037	10.6034	5.8919	8.3324	5.8919	3	0	3					5.8919	5.8919	8.3324	9.16021	10.6034	13.1037
150	3	2	2	3	3	6	10	15	-1.42963	-8.87524	3.9118	-1.43356	1.43356	3.9118	-8.87524	1.42963	9.16021	13.1037	12.7133	5.8919	13.1037	10.6034	2	0	15					5.8919	9.16021	10.6034	12.7133	13.1037	13.1037		64.5762
151	3	2	2	4	3	6	10	16	-1.42963	-8.87524	3.9118	-1.43356	1.43356	3.9118	-8.87524	-1.42963	9.16021	13.1037	10.5297	5.8919	12.787	11.6104	2	0	14					5.8919	9.16021	10.5297	11.6104	12.787	13.1037		63.0829
152	3	2	3	1	3	6	11	13	-1.42963	-8.87524	3.9118	-1.43356	1.42963	8.87524	-3.9118	-1.43356	9.16021	17.9793	7.84473	10.6034	7.82359	11.6104	2	0	38					7.82359	7.84473	9.16021	10.6034	11.6104	17.9793		65.0217
153	3	2	3	2	3	6	11	14	-1.42963	-8.87524	3.9118	-1.43356	1.42963	8.87524	-3.9118	1.43356	9.16021	17.9793	10.6034	10.6034	8.3324	9.16021	2	0	51					8.3324	9.16021	9.16021	10.6034	10.6034	17.9793		65.839
154	3	2	3	3	3	6	11	15	-1.42963	-8.87524	3.9118	-1.43356	1.42963	8.87524	-8.87524	1.42963	9.16021	17.9793	12.7133	10.6034	13.1037	12.7133	1	0	63					9.16021	10.6034	12.7133	12.7133	13.1037	17.9793
155	3	2	3	4	3	6	11	16	-1.42963	-8.87524	3.9118	-1.43356	1.42963	8.87524	-8.87524	-1.42963	9.16021	17.9793	10.5297	10.6034	12.787	14.5733	1	0	59					9.16021	10.5297	10.6034	12.787	14.5733	17.9793
156	3	2	4	1	3	6	12	13	-1.42963	-8.87524	3.9118	-1.43356	-1.42963	8.87524	-3.9118	-1.43356	9.16021	17.7505	7.84473	11.6104	7.82359	10.6034	2	0	39					7.82359	7.84473	9.16021	10.6034	11.6104	17.7505		64.7929
157	3	2	4	2	3	6	12	14	-1.42963	-8.87524	3.9118	-1.43356	-1.42963	8.87524	-3.9118	1.43356	9.16021	17.7505	10.6034	11.6104	8.3324	7.84473	2	0	35					7.84473	8.3324	9.16021	10.6034	11.6104	17.7505		65.3017
158	3	2	4	3	3	6	12	15	-1.42963	-8.87524	3.9118	-1.43356	-1.42963	8.87524	-8.87524	1.42963	9.16021	17.7505	12.7133	11.6104	13.1037	10.5297	1	0	62					9.16021	10.5297	11.6104	12.7133	13.1037	17.7505
159	3	2	4	4	3	6	12	16	-1.42963	-8.87524	3.9118	-1.43356	-1.42963	8.87524	-8.87524	-1.42963	9.16021	17.7505	10.5297	11.6104	12.787	12.7133	1	0	58					9.16021	10.5297	11.6104	12.7133	12.787	17.7505
160	3	3	1	1	3	7	9	13	-1.42963	-8.87524	8.87524	-1.42963	-1.43356	3.9118	-3.9118	-1.43356	12.7133	12.787	7.84473	11.6104	12.787	5.8919	2	0	10					5.8919	7.84473	11.6104	12.7133	12.787	12.787		63.6344
161	3	3	1	2	3	7	9	14	-1.42963	-8.87524	8.87524	-1.42963	-1.43356	3.9118	-3.9118	1.43356	12.7133	12.787	10.6034	11.6104	13.1037	3.50476	2	0	26					3.50476	10.6034	11.6104	12.7133	12.787	13.1037		64.3226
162	3	3	1	3	3	7	9	15	-1.42963	-8.87524	8.87524	-1.42963	-1.43356	3.9118	-8.87524	1.42963	12.7133	12.787	12.7133	11.6104	17.9793	7.84473	1	0	42					7.84473	11.6104	12.7133	12.7133	12.787	17.9793
163	3	3	1	4	3	7	9	16	-1.42963	-8.87524	8.87524	-1.42963	-1.43356	3.9118	-8.87524	-1.42963	12.7133	12.787	10.5297	11.6104	17.7505	9.16021	1	0	58					9.16021	10.5297	11.6104	12.7133	12.787	17.7505
164	3	3	2	1	3	7	10	13	-1.42963	-8.87524	8.87524	-1.42963	1.43356	3.9118	-3.9118	-1.43356	12.7133	13.1037	7.84473	9.16021	12.787	7.55947	2	0	41					7.55947	7.84473	9.16021	12.7133	12.787	13.1037		63.1684
165	3	3	2	2	3	7	10	14	-1.42963	-8.87524	8.87524	-1.42963	1.43356	3.9118	-3.9118	1.43356	12.7133	13.1037	10.6034	9.16021	13.1037	5.8919	2	0	15					5.8919	9.16021	10.6034	12.7133	13.1037	13.1037		64.5762
166	3	3	2	3	3	7	10	15	-1.42963	-8.87524	8.87524	-1.42963	1.43356	3.9118	-8.87524	1.42963	12.7133	13.1037	12.7133	9.16021	17.9793	10.6034	1	0	63					9.16021	10.6034	12.7133	12.7133	13.1037	17.9793
167	3	3	2	4	3	7	10	16	-1.42963	-8.87524	8.87524	-1.42963	1.43356	3.9118	-8.87524	-1.42963	12.7133	13.1037	10.5297	9.16021	17.7505	11.6104	1	0	62					9.16021	10.5297	11.6104	12.7133	13.1037	17.7505
168	3	3	3	1	3	7	11	13	-1.42963	-8.87524	8.87524	-1.42963	1.42963	8.87524	-3.9118	-1.43356	12.7133	17.9793	7.84473	12.7133	12.787	11.6104	1	0	42					7.84473	11.6104	12.7133	12.7133	12.787	17.9793
169	3	3	3	2	3	7	11	14	-1.42963	-8.87524	8.87524	-1.42963	1.42963	8.87524	-3.9118	1.43356	12.7133	17.9793	10.6034	12.7133	13.1037	9.16021	1	0	63					9.16021	10.6034	12.7133	12.7133	13.1037	17.9793
170	3	3	3	3	3	7	11	15	-1.42963	-8.87524	8.87524	-1.42963	1.42963	8.87524	-8.87524	1.42963	12.7133	17.9793	12.7133	12.7133	17.9793	12.7133	0	1	170					12.7133	12.7133	12.7133	12.7133	17.9793	17.9793
171	3	3	3	4	3	7	11	16	-1.42963	-8.87524	8.87524	-1.42963	1.42963	8.87524	-8.87524	-1.42963	12.7133	17.9793	10.5297	12.7133	17.7505	14.5733	0	1	171					10.5297	12.7133	12.7133	14.5733	17.7505	17.9793
172	3	3	4	1	3	7	12	13	-1.42963	-8.87524	8.87524	-1.42963	-1.42963	8.87524	-3.9118	-1.43356	12.7133	17.7505	7.84473	14.5733	12.787	10.6034	1	0	43					7.84473	10.6034	12.7133	12.787	14.5733	17.7505
173	3	3	4	2	3	7	12	14	-1.42963	-8.87524	8.87524	-1.42963	-1.42963	8.87524	-3.9118	1.43356	12.7133	17.7505	10.6034	14.5733	13.1037	7.84473	1	0	47					7.84473	10.6034	12.7133	13.1037	14.5733	17.7505
174	3	3	4	3	3	7	12	15	-1.42963	-8.87524	8.87524	-1.42963	-1.42963	8.87524	-8.87524	1.42963	12.7133	17.7505	12.7133	14.5733	17.9793	10.5297	0	0	171					10.5297	12.7133	12.7133	14.5733	17.7505	17.9793
175	3	3	4	4	3	7	12	16	-1.42963	-8.87524	8.87524	-1.42963	-1.42963	8.87524	-8.87524	-1.42963	12.7133	17.7505	10.5297	14.5733	17.7505	12.7133	0	1	175					10.5297	12.7133	12.7133	14.5733	17.7505	17.7505
176	3	4	1	1	3	8	9	13	-1.42963	-8.87524	8.87524	1.42963	-1.43356	3.9118	-3.9118	-1.43356	14.5733	12.787	7.84473	10.6034	13.1037	5.8919	2	0	11					5.8919	7.84473	10.6034	12.787	13.1037	14.5733		64.8041
177	3	4	1	2	3	8	9	14	-1.42963	-8.87524	8.87524	1.42963	-1.43356	3.9118	-3.9118	1.43356	14.5733	12.787	10.6034	10.6034	12.787	3.50476	2	0	27					3.50476	10.6034	10.6034	12.787	12.787	14.5733		64.859
178	3	4	1	3	3	8	9	15	-1.42963	-8.87524	8.87524	1.42963	-1.43356	3.9118	-8.87524	1.42963	14.5733	12.787	12.7133	10.6034	17.7505	7.84473	1	0	43					7.84473	10.6034	12.7133	12.787	14.5733	17.7505
179	3	4	1	4	3	8	9	16	-1.42963	-8.87524	8.87524	1.42963	-1.43356	3.9118	-8.87524	-1.42963	14.5733	12.787	10.5297	10.6034	17.9793	9.16021	1	0	59					9.16021	10.5297	10.6034	12.787	14.5733	17.9793
180	3	4	2	1	3	8	10	13	-1.42963	-8.87524	8.87524	1.42963	1.43356	3.9118	-3.9118	-1.43356	14.5733	13.1037	7.84473	7.84473	13.1037	7.55947	2	0	45					7.55947	7.84473	7.84473	13.1037	13.1037	14.5733		64.0296
181	3	4	2	2	3	8	10	14	-1.42963	-8.87524	8.87524	1.42963	1.43356	3.9118	-3.9118	1.43356	14.5733	13.1037	10.6034	7.84473	12.787	5.8919	2	0	11					5.8919	7.84473	10.6034	12.787	13.1037	14.5733		64.8041
182	3	4	2	3	3	8	10	15	-1.42963	-8.87524	8.87524	1.42963	1.43356	3.9118	-8.87524	1.42963	14.5733	13.1037	12.7133	7.84473	17.7505	10.6034	1	0	47					7.84473	10.6034	12.7133	13.1037	14.5733	17.7505
183	3	4	2	4	3	8	10	16	-1.42963	-8.87524	8.87524	1.42963	1.43356	3.9118	-8.87524	-1.42963	14.5733	13.1037	10.5297	7.84473	17.9793	11.6104	1	0	46					7.84473	10.5297	11.6104	13.1037	14.5733	17.9793
184	3	4	3	1	3	8	11	13	-1.42963	-8.87524	8.87524	1.42963	1.42963	8.87524	-3.9118	-1.43356	14.5733	17.9793	7.84473	10.5297	13.1037	11.6104	1	0	46					7.84473	10.5297	11.6104	13.1037	14.5733	17.9793
185	3	4	3	2	3	8	11	14	-1.42963	-8.87524	8.87524	1.42963	1.42963	8.87524	-3.9118	1.43356	14.5733	17.9793	10.6034	10.5297	12.787	9.16021	1	0	59					9.16021	10.5297	10.6034	12.787	14.5733	17.9793
186	3	4	3	3	3	8	11	15	-1.42963	-8.87524	8.87524	1.42963	1.42963	8.87524	-8.87524	1.42963	14.5733	17.9793	12.7133	10.5297	17.7505	12.7133	0	0	171					10.5297	12.7133	12.7133	14.5733	17.7505	17.9793
187	3	4	3	4	3	8	11	16	-1.42963	-8.87524	8.87524	1.42963	1.42963	8.87524	-8.87524	-1.42963	14.5733	17.9793	10.5297	10.5297	17.9793	14.5733	0	1	187					10.5297	10.5297	14.5733	14.5733	17.9793	17.9793
188	3	4	4	1	3	8	12	13	-1.42963	-8.87524	8.87524	1.42963	-1.42963	8.87524	-3.9118	-1.43356	14.5733	17.7505	7.84473	12.7133	13.1037	10.6034	1	0	47					7.84473	10.6034	12.7133	13.1037	14.5733	17.7505
189	3	4	4	2	3	8	12	14	-1.42963	-8.87524	8.87524	1.42963	-1.42963	8.87524	-3.9118	1.43356	14.5733	17.7505	10.6034	12.7133	12.787	7.84473	1	0	43					7.84473	10.6034	12.7133	12.787	14.5733	17.7505
190	3	4	4	3	3	8	12	15	-1.42963	-8.87524	8.87524	1.42963	-1.42963	8.87524	-8.87524	1.42963	14.5733	17.7505	12.7133	12.7133	17.7505	10.5297	0	0	175					10.5297	12.7133	12.7133	14.5733	17.7505	17.7505
191	3	4	4	4	3	8	12	16	-1.42963	-8.87524	8.87524	1.42963	-1.42963	8.87524	-8.87524	-1.42963	14.5733	17.7505	10.5297	12.7133	17.9793	12.7133	0	0	171					10.5297	12.7133	12.7133	14.5733	17.7505	17.9793
192	4	1	1	1	4	5	9	13	1.42963	-8.87524	3.9118	1.43356	-1.43356	3.9118	-3.9118	-1.43356	10.6034	13.1037	9.16021	5.8919	8.3324	5.8919	3	0	3					5.8919	5.8919	8.3324	9.16021	10.6034	13.1037
193	4	1	1	2	4	5	9	14	1.42963	-8.87524	3.9118	1.43356	-1.43356	3.9118	-3.9118	1.43356	10.6034	13.1037	11.6104	5.8919	7.82359	3.50476	3	0	7					3.50476	5.8919	7.82359	10.6034	11.6104	13.1037
194	4	1	1	3	4	5	9	15	1.42963	-8.87524	3.9118	1.43356	-1.43356	3.9118	-8.87524	1.42963	10.6034	13.1037	14.5733	5.8919	12.787	7.84473	2	0	11					5.8919	7.84473	10.6034	12.787	13.1037	14.5733		64.8041
195	4	1	1	4	4	5	9	16	1.42963	-8.87524	3.9118	1.43356	-1.43356	3.9118	-8.87524	-1.42963	10.6034	13.1037	12.7133	5.8919	13.1037	9.16021	2	0	15					5.8919	9.16021	10.6034	12.7133	13.1037	13.1037		64.5762
196	4	1	2	1	4	5	10	13	1.42963	-8.87524	3.9118	1.43356	1.43356	3.9118	-3.9118	-1.43356	10.6034	12.787	9.16021	3.50476	8.3324	7.55947	3	0	19					3.50476	7.55947	8.3324	9.16021	10.6034	12.787
197	4	1	2	2	4	5	10	14	1.42963	-8.87524	3.9118	1.43356	1.43356	3.9118	-3.9118	1.43356	10.6034	12.787	11.6104	3.50476	7.82359	5.8919	3	0	6					3.50476	5.8919	7.82359	10.6034	11.6104	12.787
198	4	1	2	3	4	5	10	15	1.42963	-8.87524	3.9118	1.43356	1.43356	3.9118	-8.87524	1.42963	10.6034	12.787	14.5733	3.50476	12.787	10.6034	2	0	27					3.50476	10.6034	10.6034	12.787	12.787	14.5733		64.859
199	4	1	2	4	4	5	10	16	1.42963	-8.87524	3.9118	1.43356	1.43356	3.9118	-8.87524	-1.42963	10.6034	12.787	12.7133	3.50476	13.1037	11.6104	2	0	26					3.50476	10.6034	11.6104	12.7133	12.787	13.1037		64.3226
200	4	1	3	1	4	5	11	13	1.42963	-8.87524	3.9118	1.43356	1.42963	8.87524	-3.9118	-1.43356	10.6034	17.7505	9.16021	7.84473	8.3324	11.6104	2	0	35					7.84473	8.3324	9.16021	10.6034	11.6104	17.7505		65.3017
201	4	1	3	2	4	5	11	14	1.42963	-8.87524	3.9118	1.43356	1.42963	8.87524	-3.9118	1.43356	10.6034	17.7505	11.6104	7.84473	7.82359	9.16021	2	0	39					7.82359	7.84473	9.16021	10.6034	11.6104	17.7505		64.7929
202	4	1	3	3	4	5	11	15	1.42963	-8.87524	3.9118	1.43356	1.42963	8.87524	-8.87524	1.42963	10.6034	17.7505	14.5733	7.84473	12.787	12.7133	1	0	43					7.84473	10.6034	12.7133	12.787	14.5733	17.7505
203	4	1	3	4	4	5	11	16	1.42963	-8.87524	3.9118	1.43356	1.42963	8.87524	-8.87524	-1.42963	10.6034	17.7505	12.7133	7.84473	13.1037	14.5733	1	0	47					7.84473	10.6034	12.7133	13.1037	14.5733	17.7505
204	4	1	4	1	4	5	12	13	1.42963	-8.87524	3.9118	1.43356	-1.42963	8.87524	-3.9118	-1.43356	10.6034	17.9793	9.16021	9.16021	8.3324	10.6034	2	0	51					8.3324	9.16021	9.16021	10.6034	10.6034	17.9793		65.839
205	4	1	4	2	4	5	12	14	1.42963	-8.87524	3.9118	1.43356	-1.42963	8.87524	-3.9118	1.43356	10.6034	17.9793	11.6104	9.16021	7.82359	7.84473	2	0	38					7.82359	7.84473	9.16021	10.6034	11.6104	17.9793		65.0217
206	4	1	4	3	4	5	12	15	1.42963	-8.87524	3.9118	1.43356	-1.42963	8.87524	-8.87524	1.42963	10.6034	17.9793	14.5733	9.16021	12.787	10.5297	1	0	59					9.16021	10.5297	10.6034	12.787	14.5733	17.9793
207	4	1	4	4	4	5	12	16	1.42963	-8.87524	3.9118	1.43356	-1.42963	8.87524	-8.87524	-1.42963	10.6034	17.9793	12.7133	9.16021	13.1037	12.7133	1	0	63					9.16021	10.6034	12.7133	12.7133	13.1037	17.9793
208	4	2	1	1	4	6	9	13	1.42963	-8.87524	3.9118	-1.43356	-1.43356	3.9118	-3.9118	-1.43356	7.84473	13.1037	9.16021	7.55947	7.82359	5.8919	3	0	13					5.8919	7.55947	7.82359	7.84473	9.16021	13.1037
209	4	2	1	2	4	6	9	14	1.42963	-8.87524	3.9118	-1.43356	-1.43356	3.9118	-3.9118	1.43356	7.84473	13.1037	11.6104	7.55947	8.3324	3.50476	3	0	18					3.50476	7.55947	7.84473	8.3324	11.6104	13.1037
210	4	2	1	3	4	6	9	15	1.42963	-8.87524	3.9118	-1.43356	-1.43356	3.9118	-8.87524	1.42963	7.84473	13.1037	14.5733	7.55947	13.1037	7.84473	2	0	45					7.55947	7.84473	7.84473	13.1037	13.1037	14.5733		64.0296
211	4	2	1	4	4	6	9	16	1.42963	-8.87524	3.9118	-1.43356	-1.43356	3.9118	-8.87524	-1.42963	7.84473	13.1037	12.7133	7.55947	12.787	9.16021	2	0	41					7.55947	7.84473	9.16021	12.7133	12.787	13.1037		63.1684
212	4	2	2	1	4	6	10	13	1.42963	-8.87524	3.9118	-1.43356	1.43356	3.9118	-3.9118	-1.43356	7.84473	12.787	9.16021	5.8919	7.82359	7.55947	3	0	9					5.8919	7.55947	7.82359	7.84473	9.16021	12.787
213	4	2	2	2	4	6	10	14	1.42963	-8.87524	3.9118	-1.43356	1.43356	3.9118	-3.9118	1.43356	7.84473	12.787	11.6104	5.8919	8.3324	5.8919	3	0	2					5.8919	5.8919	7.84473	8.3324	11.6104	12.787
214	4	2	2	3	4	6	10	15	1.42963	-8.87524	3.9118	-1.43356	1.43356	3.9118	-8.87524	1.42963	7.84473	12.787	14.5733	5.8919	13.1037	10.6034	2	0	11					5.8919	7.84473	10.6034	12.787	13.1037	14.5733		64.8041
215	4	2	2	4	4	6	10	16	1.42963	-8.87524	3.9118	-1.43356	1.43356	3.9118	-8.87524	-1.42963	7.84473	12.787	12.7133	5.8919	12.787	11.6104	2	0	10					5.8919	7.84473	11.6104	12.7133	12.787	12.787		63.6344
216	4	2	3	1	4	6	11	13	1.42963	-8.87524	3.9118	-1.43356	1.42963	8.87524	-3.9118	-1.43356	7.84473	17.7505	9.16021	10.6034	7.82359	11.6104	2	0	39					7.82359	7.84473	9.16021	10.6034	11.6104	17.7505		64.7929
217	4	2	3	2	4	6	11	14	1.42963	-8.87524	3.9118	-1.43356	1.42963	8.87524	-3.9118	1.43356	7.84473	17.7505	11.6104	10.6034	8.3324	9.16021	2	0	35					7.84473	8.3324	9.16021	10.6034	11.6104	17.7505		65.3017
218	4	2	3	3	4	6	11	15	1.42963	-8.87524	3.9118	-1.43356	1.42963	8.87524	-8.87524	1.42963	7.84473	17.7505	14.5733	10.6034	13.1037	12.7133	1	0	47					7.84473	10.6034	12.7133	13.1037	14.5733	17.7505
219	4	2	3	4	4	6	11	16	1.42963	-8.87524	3.9118	-1.43356	1.42963	8.87524	-8.87524	-1.42963	7.84473	17.7505	12.7133	10.6034	12.787	14.5733	1	0	43					7.84473	10.6034	12.7133	12.787	14.5733	17.7505
220	4	2	4	1	4	6	12	13	1.42963	-8.87524	3.9118	-1.43356	-1.42963	8.87524	-3.9118	-1.43356	7.84473	17.9793	9.16021	11.6104	7.82359	10.6034	2	0	38					7.82359	7.84473	9.16021	10.6034	11.6104	17.9793		65.0217
221	4	2	4	2	4	6	12	14	1.42963	-8.87524	3.9118	-1.43356	-1.42963	8.87524	-3.9118	1.43356	7.84473	17.9793	11.6104	11.6104	8.3324	7.84473	2	0	34					7.84473	7.84473	8.3324	11.6104	11.6104	17.9793		65.222
222	4	2	4	3	4	6	12	15	1.42963	-8.87524	3.9118	-1.43356	-1.42963	8.87524	-8.87524	1.42963	7.84473	17.9793	14.5733	11.6104	13.1037	10.5297	1	0	46					7.84473	10.5297	11.6104	13.1037	14.5733	17.9793
223	4	2	4	4	4	6	12	16	1.42963	-8.87524	3.9118	-1.43356	-1.42963	8.87524	-8.87524	-1.42963	7.84473	17.9793	12.7133	11.6104	12.787	12.7133	1	0	42					7.84473	11.6104	12.7133	12.7133	12.787	17.9793
224	4	3	1	1	4	7	9	13	1.42963	-8.87524	8.87524	-1.42963	-1.43356	3.9118	-3.9118	-1.43356	10.5297	13.1037	9.16021	11.6104	12.787	5.8919	2	0	14					5.8919	9.16021	10.5297	11.6104	12.787	13.1037		63.0829
225	4	3	1	2	4	7	9	14	1.42963	-8.87524	8.87524	-1.42963	-1.43356	3.9118	-3.9118	1.43356	10.5297	13.1037	11.6104	11.6104	13.1037	3.50476	2	0	30					3.50476	10.5297	11.6104	11.6104	13.1037	13.1037		63.4627
226	4	3	1	3	4	7	9	15	1.42963	-8.87524	8.87524	-1.42963	-1.43356	3.9118	-8.87524	1.42963	10.5297	13.1037	14.5733	11.6104	17.9793	7.84473	1	0	46					7.84473	10.5297	11.6104	13.1037	14.5733	17.9793
227	4	3	1	4	4	7	9	16	1.42963	-8.87524	8.87524	-1.42963	-1.43356	3.9118	-8.87524	-1.42963	10.5297	13.1037	12.7133	11.6104	17.7505	9.16021	1	0	62					9.16021	10.5297	11.6104	12.7133	13.1037	17.7505
228	4	3	2	1	4	7	10	13	1.42963	-8.87524	8.87524	-1.42963	1.43356	3.9118	-3.9118	-1.43356	10.5297	12.787	9.16021	9.16021	12.787	7.55947	2	0	57					7.55947	9.16021	9.16021	10.5297	12.787	12.787		61.9837
229	4	3	2	2	4	7	10	14	1.42963	-8.87524	8.87524	-1.42963	1.43356	3.9118	-3.9118	1.43356	10.5297	12.787	11.6104	9.16021	13.1037	5.8919	2	0	14					5.8919	9.16021	10.5297	11.6104	12.787	13.1037		63.0829
230	4	3	2	3	4	7	10	15	1.42963	-8.87524	8.87524	-1.42963	1.43356	3.9118	-8.87524	1.42963	10.5297	12.787	14.5733	9.16021	17.9793	10.6034	1	0	59					9.16021	10.5297	10.6034	12.787	14.5733	17.9793
231	4	3	2	4	4	7	10	16	1.42963	-8.87524	8.87524	-1.42963	1.43356	3.9118	-8.87524	-1.42963	10.5297	12.787	12.7133	9.16021	17.7505	11.6104	1	0	58					9.16021	10.5297	11.6104	12.7133	12.787	17.7505
232	4	3	3	1	4	7	11	13	1.42963	-8.87524	8.87524	-1.42963	1.42963	8.87524	-3.9118	-1.43356	10.5297	17.7505	9.16021	12.7133	12.787	11.6104	1	0	58					9.16021	10.5297	11.6104	12.7133	12.787	17.7505
233	4	3	3	2	4	7	11	14	1.42963	-8.87524	8.87524	-1.42963	1.42963	8.87524	-3.9118	1.43356	10.5297	17.7505	11.6104	12.7133	13.1037	9.16021	1	0	62					9.16021	10.5297	11.6104	12.7133	13.1037	17.7505
234	4	3	3	3	4	7	11	15	1.42963	-8.87524	8.87524	-1.42963	1.42963	8.87524	-8.87524	1.42963	10.5297	17.7505	14.5733	12.7133	17.9793	12.7133	0	0	171					10.5297	12.7133	12.7133	14.5733	17.7505	17.9793
235	4	3	3	4	4	7	11	16	1.42963	-8.87524	8.87524	-1.42963	1.42963	8.87524	-8.87524	-1.42963	10.5297	17.7505	12.7133	12.7133	17.7505	14.5733	0	0	175					10.5297	12.7133	12.7133	14.5733	17.7505	17.7505
236	4	3	4	1	4	7	12	13	1.42963	-8.87524	8.87524	-1.42963	-1.42963	8.87524	-3.9118	-1.43356	10.5297	17.9793	9.16021	14.5733	12.787	10.6034	1	0	59					9.16021	10.5297	10.6034	12.787	14.5733	17.9793
237	4	3	4	2	4	7	12	14	1.42963	-8.87524	8.87524	-1.42963	-1.42963	8.87524	-3.9118	1.43356	10.5297	17.9793	11.6104	14.5733	13.1037	7.84473	1	0	46					7.84473	10.5297	11.6104	13.1037	14.5733	17.9793
238	4	3	4	3	4	7	12	15	1.42963	-8.87524	8.87524	-1.42963	-1.42963	8.87524	-8.87524	1.42963	10.5297	17.9793	14.5733	14.5733	17.9793	10.5297	0	0	187					10.5297	10.5297	14.5733	14.5733	17.9793	17.9793
239	4	3	4	4	4	7	12	16	1.42963	-8.87524	8.87524	-1.42963	-1.42963	8.87524	-8.87524	-1.42963	10.5297	17.9793	12.7133	14.5733	17.7505	12.7133	0	0	171					10.5297	12.7133	12.7133	14.5733	17.7505	17.9793
240	4	4	1	1	4	8	9	13	1.42963	-8.87524	8.87524	1.42963	-1.43356	3.9118	-3.9118	-1.43356	12.7133	13.1037	9.16021	10.6034	13.1037	5.8919	2	0	15					5.8919	9.16021	10.6034	12.7133	13.1037	13.1037		64.5762
241	4	4	1	2	4	8	9	14	1.42963	-8.87524	8.87524	1.42963	-1.43356	3.9118	-3.9118	1.43356	12.7133	13.1037	11.6104	10.6034	12.787	3.50476	2	0	26					3.50476	10.6034	11.6104	12.7133	12.787	13.1037		64.3226
242	4	4	1	3	4	8	9	15	1.42963	-8.87524	8.87524	1.42963	-1.43356	3.9118	-8.87524	1.42963	12.7133	13.1037	14.5733	10.6034	17.7505	7.84473	1	0	47					7.84473	10.6034	12.7133	13.1037	14.5733	17.7505
243	4	4	1	4	4	8	9	16	1.42963	-8.87524	8.87524	1.42963	-1.43356	3.9118	-8.87524	-1.42963	12.7133	13.1037	12.7133	10.6034	17.9793	9.16021	1	0	63					9.16021	10.6034	12.7133	12.7133	13.1037	17.9793
244	4	4	2	1	4	8	10	13	1.42963	-8.87524	8.87524	1.42963	1.43356	3.9118	-3.9118	-1.43356	12.7133	12.787	9.16021	7.84473	13.1037	7.55947	2	0	41					7.55947	7.84473	9.16021	12.7133	12.787	13.1037		63.1684
245	4	4	2	2	4	8	10	14	1.42963	-8.87524	8.87524	1.42963	1.43356	3.9118	-3.9118	1.43356	12.7133	12.787	11.6104	7.84473	12.787	5.8919	2	0	10					5.8919	7.84473	11.6104	12.7133	12.787	12.787		63.6344
246	4	4	2	3	4	8	10	15	1.42963	-8.87524	8.87524	1.42963	1.43356	3.9118	-8.87524	1.42963	12.7133	12.787	14.5733	7.84473	17.7505	10.6034	1	0	43					7.84473	10.6034	12.7133	12.787	14.5733	17.7505
247	4	4	2	4	4	8	10	16	1.42963	-8.87524	8.87524	1.42963	1.43356	3.9118	-8.87524	-1.42963	12.7133	12.787	12.7133	7.84473	17.9793	11.6104	1	0	42					7.84473	11.6104	12.7133	12.7133	12.787	17.9793
248	4	4	3	1	4	8	11	13	1.42963	-8.87524	8.87524	1.42963	1.42963	8.87524	-3.9118	-1.43356	12.7133	17.7505	9.16021	10.5297	13.1037	11.6104	1	0	62					9.16021	10.5297	11.6104	12.7133	13.1037	17.7505
249	4	4	3	2	4	8	11	14	1.42963	-8.87524	8.87524	1.42963	1.42963	8.87524	-3.9118	1.43356	12.7133	17.7505	11.6104	10.5297	12.787	9.16021	1	0	58					9.16021	10.5297	11.6104	12.7133	12.787	17.7505
250	4	4	3	3	4	8	11	15	1.42963	-8.87524	8.87524	1.42963	1.42963	8.87524	-8.87524	1.42963	12.7133	17.7505	14.5733	10.5297	17.7505	12.7133	0	0	175					10.5297	12.7133	12.7133	14.5733	17.7505	17.7505
251	4	4	3	4	4	8	11	16	1.42963	-8.87524	8.87524	1.42963	1.42963	8.87524	-8.87524	-1.42963	12.7133	17.7505	12.7133	10.5297	17.9793	14.5733	0	0	171					10.5297	12.7133	12.7133	14.5733	17.7505	17.9793
252	4	4	4	1	4	8	12	13	1.42963	-8.87524	8.87524	1.42963	-1.42963	8.87524	-3.9118	-1.43356	12.7133	17.9793	9.16021	12.7133	13.1037	10.6034	1	0	63					9.16021	10.6034	12.7133	12.7133	13.1037	17.9793
253	4	4	4	2	4	8	12	14	1.42963	-8.87524	8.87524	1.42963	-1.42963	8.87524	-3.9118	1.43356	12.7133	17.9793	11.6104	12.7133	12.787	7.84473	1	0	42					7.84473	11.6104	12.7133	12.7133	12.787	17.9793
254	4	4	4	3	4	8	12	15	1.42963	-8.87524	8.87524	1.42963	-1.42963	8.87524	-8.87524	1.42963	12.7133	17.9793	14.5733	12.7133	17.7505	10.5297	0	0	171					10.5297	12.7133	12.7133	14.5733	17.7505	17.9793
255	4	4	4	4	4	8	12	16	1.42963	-8.87524	8.87524	1.42963	-1.42963	8.87524	-8.87524	-1.42963	12.7133	17.9793	12.7133	12.7133	17.9793	12.7133	0	0	170					12.7133	12.7133	12.7133	12.7133	17.9793	17.9793

## Sheet: scratch
2	1	10		8
2	1	11		8
2	1	14		8
2	1	15		8
2	1	26		8
2	1	27		4
2	1	30		4
2	1	34		4
2	1	35		8
2	1	38		8
2	1	39		8
2	1	41		8
2	1	45		4
2	1	51		4
2	1	57		4	96
2	0	26
2	0	10
2	0	11
2	0	35
2	0	39
2	0	38
2	0	14
2	0	15
2	0	41
2	0	41
2	0	45
2	0	57
2	0	41
2	0	15
2	0	11
2	0	14
2	0	10
2	0	38
2	0	39
2	0	51
2	0	35
2	0	26
2	0	15
2	0	27
2	0	11
2	0	39
2	0	38
2	0	35
2	0	34
2	0	30
2	0	14
2	0	26
2	0	10
2	0	10
2	0	14
2	0	26
2	0	30
2	0	34
2	0	38
2	0	35
2	0	39
2	0	41
2	0	57
2	0	15
2	0	14
2	0	38
2	0	51
2	0	39
2	0	35
2	0	10
2	0	26
2	0	41
2	0	15
2	0	11
2	0	27
2	0	45
2	0	11
2	0	11
2	0	15
2	0	27
2	0	26
2	0	35
2	0	39
2	0	51
2	0	38
2	0	45
2	0	41
2	0	11
2	0	10
2	0	39
2	0	35
2	0	38
2	0	34
2	0	14
2	0	30
2	0	57
2	0	14
2	0	15
2	0	26
2	0	41
2	0	10
