# Supplementary material for: Machine learning of isomerization in porous molecular frameworks: exploring functional group pair distance distributions
Source: Royal Society of Chemistry journal article supplement (doi:10.1039/d3qi01065a), 2023-01-01
Supplement: d3qi01065a4.xlsx [file d3qi01065a4.xlsx]

## Sheet: Tri2Di3
BDC linker						PBDC (outer) linker						PBDC (inner) linker
FG-FG distance (Å)	Count*	In-In*	In-Out*	Out-Out*		FG-FG distance (Å)	Count*	In-In*	In-Out*	Out-Out*		FG-FG distance (Å)	Count*	In-In*	In-Out*	Out-Out*		*multiply by	4
3.85	6	6	0	0		4.53	6	6	0	0		4.62	6	6	0	0
4.83	6	6	0	0		8.48	6	6	0	0		4.82	6	6	0	0
8.4	12	0	12	0		9.12	12	0	12	0		9.18	12	0	12	0
8.89	12	0	12	0		11.62	12	0	12	0		9.28	12	0	12	0
12.24	6	0	0	6		13.04	6	0	0	6		13.07	6	0	0	6
12.57	6	0	0	6		14.9	6	0	0	6		13.15	6	0	0	6

## Sheet: Tri4Di6
BDC linker						PBDC (outer) linker						PBDC (inner) linker
FG-FG distance (Å)	Count*	In-In*	In-Out*	Out-Out*		FG-FG distance (Å)	Count*	In-In*	In-Out*	Out-Out*		FG-FG distance (Å)	Count*	In-In*	In-Out*	Out-Out*		*multiply by	256
3.14	12	12	0	0		3.92	12	12	0	0		6.89	12	12	0	0
5.26	24	24	0	0		8.16	24	0	24	0		7.66	24	24	0	0
6.08	12	12	0	0		9.73	24	24	0	0		8.26	12	12	0	0
6.84	12	12	0	0		10.83	12	0	0	12		10.75	12	12	0	0
7.41	24	0	24	0		11.07	12	12	0	0		10.89	24	0	24	0
8.51	24	0	24	0		11.75	12	12	0	0		11.42	24	0	24	0
9.63	24	0	24	0		12.1	24	0	24	0		11.8	24	0	24	0
10.02	12	0	0	12		13.99	24	0	24	0		12.21	24	0	24	0
10.09	24	0	24	0		14.96	24	0	24	0		13.75	12	0	0	12
11.54	24	0	24	0		15.73	24	0	0	24		14.52	24	0	0	24
11.73	24	0	0	24		16.32	24	0	24	0		15.19	12	0	0	12
12.9	12	0	0	12		18.05	12	0	0	12		15.62	24	0	24	0
16.33	12	0	0	12		21.05	12	0	0	12		20.48	12	0	0	12

## Sheet: Tri4-2Di6
BDC linker						PBDC (outer) linker						PBDC (inner) linker
FG-FG distance (Å)	Count*	In-In*	In-Out*	Out-Out*		FG-FG distance (Å)	Count*	In-In*	In-Out*	Out-Out*		FG-FG distance (Å)	Count*	In-In*	In-Out*	Out-Out*		*multiply by	256
8.68	8	8	0	0		10.38	8	8	0	0		13.38	8	8	0	0
10.38	8	8	0	0		13.25	8	0	8	0		14.19	8	8	0	0
10.54	8	8	0	0		14.82	8	0	8	0		14.24	8	8	0	0
11.07	2	2	0	0		14.98	8	8	0	0		15.01	8	8	0	0
11.46	2	2	0	0		15	8	8	0	0		16.28	2	2	0	0
11.77	8	0	8	0		16.18	2	2	0	0		16.34	2	2	0	0
11.99	8	8	0	0		16.29	4	4	0	0		16.37	4	4	0	0
12.2	4	4	0	0		16.37	4	4	0	0		16.43	4	4	0	0
12.21	4	4	0	0		16.93	8	0	0	8		16.48	4	4	0	0
12.55	4	4	0	0		17.12	8	0	8	0		16.54	4	4	0	0
12.56	4	4	0	0		17.69	2	2	0	0		16.57	8	0	8	0
13.13	8	0	8	0		17.83	4	4	0	0		17.27	8	0	8	0
13.18	8	0	8	0		17.9	4	4	0	0		17.62	8	0	8	0
14.12	8	0	8	0		18.4	8	0	8	0		17.68	8	0	8	0
14.3	8	0	8	0		18.48	8	8	0	0		18.33	16	0	16	0
15.12	8	0	8	0		19.08	8	0	8	0		18.51	8	0	8	0
15.32	8	0	8	0		19.67	8	0	8	0		19.18	8	0	8	0
15.37	8	0	0	8		20.1	8	0	8	0		20.13	8	0	0	8
15.92	4	0	4	0		20.12	8	0	8	0		20.16	8	0	8	0
16	8	0	8	0		21.09	4	0	4	0		20.17	8	0	8	0
16.01	8	0	8	0		21.33	8	0	0	8		20.22	8	0	8	0
16.14	8	0	8	0		21.38	8	0	8	0		20.23	8	0	8	0
16.18	4	0	4	0		21.4	8	0	8	0		20.95	8	0	0	8
16.26	8	0	8	0		21.85	8	0	0	8		21.12	8	0	0	8
16.27	8	0	8	0		21.94	8	0	8	0		21.16	4	0	4	0
17.06	8	0	0	8		22.28	4	0	4	0		21.21	4	0	4	0
17.21	8	0	0	8		22.48	8	0	8	0		21.9	8	0	0	8
17.26	4	4	0	0		23.1	4	4	0	0		23.22	4	4	0	0
17.51	4	4	0	0		23.19	4	0	0	4		23.25	4	0	0	4
18.73	8	0	0	8		23.36	4	0	0	4		23.27	4	4	0	0
19.06	8	0	0	8		24.21	4	4	0	0		23.3	4	0	0	4
19.28	8	0	0	8		24.33	4	0	0	4		23.38	4	0	0	4
20.76	2	0	0	2		24.49	4	0	0	4		23.44	4	0	0	4
20.96	2	0	0	2		25.42	8	0	0	8		26.04	2	0	0	2
22.11	8	0	8	0		26	2	0	0	2		26.08	2	0	0	2
22.3	8	0	8	0		26.98	2	0	0	2		28.1	8	0	8	0
26.95	4	0	0	4		28.01	8	0	8	0		28.14	8	0	8	0
27.11	4	0	0	4		28.94	8	0	8	0		32.98	4	0	0	4
						32.92	4	0	0	4		33.01	4	0	0	4
						33.73	4	0	0	4

## Sheet: Tri6Di9
BDC linker						PBDC (outer) linker						PBDC (inner) linker
FG-FG distance (Å)	Count*	In-In*	In-Out*	Out-Out*		FG-FG distance (Å)	Count*	In-In*	In-Out*	Out-Out*		FG-FG distance (Å)	Count*	In-In*	In-Out*	Out-Out*		*multiply by	16384
4.37	6	6	0	0		4.91	6	6	0	0		7.87	6	6	0	0
6.17	12	12	0	0		6.84	12	12	0	0		8.61	12	12	0	0
6.37	12	12	0	0		8.29	12	0	12	0		9.21	6	6	0	0
7.3	6	6	0	0		9.04	6	0	0	6		10.85	12	0	12	0
7.81	12	0	12	0		10.5	12	12	0	0		11	12	12	0	0
8.51	24	24	0	0		10.57	24	0	24	0		11.42	12	0	12	0
8.59	6	0	0	6		12.06	6	6	0	0		11.64	12	0	12	0
9.06	12	0	12	0		12.46	12	0	12	0		11.93	6	0	0	6
9.73	12	0	12	0		12.85	12	0	0	12		11.98	12	12	0	0
9.92	24	0	24	0		12.91	24	24	0	0		12	12	12	0	0
10.33	24	12	0	12		13.57	12	0	12	0		12.1	12	0	12	0
10.36	12	0	12	0		14.07	12	0	0	12		12.69	12	0	0	12
11.1	12	12	0	0		14.82	12	0	12	0		12.91	12	12	0	0
11.47	30	0	24	6		15.26	24	0	24	0		13.33	6	0	0	6
11.67	12	12	0	0		15.81	12	12	0	0		14.48	12	0	12	0
12.03	12	12	0	0		16.21	6	0	0	6		14.51	12	0	12	0
12.15	12	0	0	12		16.79	12	12	0	0		15.3	24	0	24	0
12.46	6	6	0	0		16.94	12	12	0	0		15.61	12	0	12	0
12.55	36	12	24	0		17.1	24	0	24	0		15.67	12	0	12	0
13.29	12	12	0	0		17.5	6	6	0	0		16.37	12	0	12	0
13.77	6	6	0	0		18.24	12	12	0	0		16.4	12	0	12	0
13.82	24	0	24	0		18.62	24	0	0	24		16.64	12	12	0	0
14.33	24	0	0	24		19.24	12	12	0	0		16.89	6	6	0	0
15.24	12	0	12	0		19.63	12	0	12	0		16.93	12	12	0	0
15.65	12	0	12	0		19.81	12	12	0	0		16.96	12	0	0	12
16.05	24	0	24	0		20.33	24	0	24	0		16.98	6	6	0	0
16.22	12	0	0	12		20.43	12	0	12	0		17.32	12	12	0	0
16.31	24	0	24	0		20.68	6	6	0	0		17.97	12	0	0	12
16.69	12	0	12	0		21.22	24	0	24	0		18	12	0	0	12
17.07	12	0	12	0		22.25	12	0	12	0		18.63	6	6	0	0
17.18	12	0	12	0		22.4	24	0	24	0		18.96	24	12	0	12
17.78	12	0	12	0		23.02	12	0	0	12		19.23	6	6	0	0
18.13	12	0	12	0		23.21	12	0	12	0		20.89	12	0	12	0
18.48	12	0	12	0		23.81	12	0	12	0		21.06	12	0	12	0
19.43	12	0	0	12		24	12	0	0	12		21.28	24	0	24	0
20.06	12	0	0	12		24.12	12	0	12	0		21.33	24	0	24	0
20.27	12	0	0	12		24.71	12	0	12	0		21.63	12	0	12	0
20.87	12	0	0	12		25.34	12	0	0	12		21.7	12	0	12	0
21.82	6	0	0	6		25.42	12	0	12	0		23.39	12	0	12	0
22.57	12	0	0	12		26.35	12	0	0	12		23.66	12	0	12	0
23.11	6	0	0	6		26.95	6	0	0	6		23.76	12	0	12	0
						27.55	12	0	0	12		23.99	12	0	12	0
						29.02	12	0	0	12		25.01	12	0	0	12
						30.12	6	0	0	6		25.37	6	0	0	6
												25.41	6	0	0	6
												25.42	6	0	0	6
												25.45	6	0	0	6
												25.73	12	0	0	12
												28.08	6	0	0	6
												28.41	12	0	0	12
												28.7	6	0	0	6

## Sheet: Tri8Di12
BDC linker						PBDC (outer) linker						PBDC (inner) linker
FG-FG distance (Å)	Count*	In-In*	In-Out*	Out-Out*		FG-FG distance (Å)	Count*	In-In*	In-Out*	Out-Out*		FG-FG distance (Å)	Count*	In-In*	In-Out*	Out-Out*		*multiply by	1048576
6.67	24	24	0	0		7.04	24	24	0	0		11.19	24	24	0	0
8.99	48	48	0	0		10.4	48	0	48	0		12.18	48	48	0	0
10.03	48	0	48	0		11.92	24	0	0	24		13.1	24	24	0	0
10.83	24	24	0	0		13.1	48	48	0	0		14.25	48	0	48	0
11.56	24	0	0	24		15.2	48	0	48	0		15.07	48	0	48	0
11.67	48	0	48	0		16.72	48	0	48	0		15.35	48	0	48	0
12.37	24	24	0	0		17.1	24	24	0	0		16.02	24	0	0	24
12.54	48	0	48	0		17.14	24	24	0	0		16.12	48	0	48	0
12.72	24	24	0	0		17.75	48	0	0	48		17.05	48	0	0	48
13.75	48	0	0	48		18.49	24	24	0	0		17.17	24	24	0	0
13.88	48	0	48	0		18.53	24	24	0	0		17.22	24	24	0	0
14.05	24	24	0	0		20.07	48	0	48	0		18.02	24	0	0	24
15.3	48	48	0	0		20.86	48	0	48	0		20.5	24	24	0	0
15.63	24	0	0	24		21.54	48	48	0	0		20.91	48	0	48	0
16.17	48	0	48	0		22.06	48	0	48	0		20.95	48	0	48	0
16.43	48	0	48	0		22.08	24	0	0	24		21.05	48	48	0	0
16.44	24	24	0	0		22.79	48	0	48	0		21.6	24	24	0	0
17.5	12	12	0	0		24.04	24	0	0	24		24.07	24	0	0	24
17.74	12	12	0	0		24.18	12	12	0	0		24.11	24	0	0	24
18.4	48	0	48	0		24.21	24	24	0	0		24.28	12	12	0	0
19.23	24	0	0	24		25.1	24	0	0	24		24.32	12	12	0	0
19.34	48	0	48	0		25.21	12	12	0	0		24.83	48	0	48	0
19.44	24	0	0	24		25.34	48	0	48	0		25.31	48	0	48	0
19.88	48	0	48	0		26.28	48	0	48	0		25.47	48	0	48	0
20.75	48	0	48	0		26.84	24	0	0	24		25.94	48	0	48	0
22.34	24	0	24	0		28.53	48	0	48	0		28.91	24	0	0	24
22.44	24	0	0	24		29.09	24	0	24	0		29.16	24	0	24	0
22.53	24	0	24	0		29.88	48	0	0	48		29.19	24	0	24	0
23.63	48	0	0	48		29.96	24	0	24	0		29.49	48	0	0	48
24.78	24	0	0	24		32.65	24	0	0	24		30.06	24	0	0	24
27.19	12	0	0	12		34	12	0	0	12		34.04	12	0	0	12
27.34	12	0	0	12		34.75	12	0	0	12		34.07	12	0	0	12

## Sheet: Tri20Di30
BDC linker						PBDC (outer) linker						PBDC (inner) linker
FG-FG distance (Å)	Count*	In-In*	In-Out*	Out-Out*		FG-FG distance (Å)	Count*	In-In*	In-Out*	Out-Out*		FG-FG distance (Å)	Count*	In-In*	In-Out*	Out-Out*		*multiply by	7.20576e+16
8.56	60	60	0	0		8.91	60	60	0	0		13.62	60	60	0	0
11.08	240	120	120	0		11.4	120	0	120	0		14.76	120	120	0	0
11.61	60	0	0	60		11.89	60	0	0	60		15.8	120	0	120	0
13.08	120	0	120	0		15.3	120	120	0	0		15.86	60	60	0	0
13.32	60	60	0	0		16.91	120	0	120	0		16.58	60	0	0	60
13.66	120	0	120	0		17.88	120	0	120	0		16.84	120	0	120	0
14.04	120	0	0	120		18.24	120	0	0	120		16.99	120	0	120	0
15.5	120	0	120	0		20.5	60	60	0	0		17.77	116	0	0	116
16.27	60	0	0	60		21.58	60	60	0	0		17.78	4	0	0	4
16.79	60	60	0	0		22.53	120	0	120	0		18	120	0	120	0
17.92	120	120	0	0		23.35	60	60	0	0		18.93	60	0	0	60
18.61	60	60	0	0		23.59	60	0	0	60		23.42	60	60	0	0
18.85	60	60	0	0		24.4	120	0	120	0		23.88	120	120	0	0
19.68	120	0	120	0		24.75	120	120	0	0		24.28	60	60	0	0
20.63	120	0	120	0		26.01	60	60	0	0		26.19	120	0	120	0
20.86	240	120	120	0		26.47	180	0	120	60		26.63	120	0	120	0
21.44	120	0	120	0		27.27	120	0	120	0		26.69	120	0	120	0
21.66	60	0	0	60		27.65	120	0	120	0		27.06	120	0	120	0
22.06	120	0	120	0		28.2	120	120	0	0		27.09	60	60	0	0
22.71	120	0	0	120		28.79	120	0	120	0		28.04	120	120	0	0
22.89	60	60	0	0		29.02	60	0	0	60		28.28	60	0	0	60
23.44	60	0	0	60		29.52	120	0	0	120		28.76	120	0	0	120
23.77	120	0	120	0		30.88	120	0	120	0		29	60	60	0	0
24.06	120	120	0	0		30.94	60	0	0	60		29.17	60	0	0	60
24.28	120	0	120	0		31.42	120	120	0	0		30.2	120	0	120	0
24.57	60	0	0	60		31.75	120	0	120	0		31.1	120	0	120	0
26.01	120	0	120	0		33.12	60	60	0	0		31.23	120	0	120	0
26.14	120	120	0	0		33.94	120	0	0	120		32.13	120	0	120	0
26.55	120	0	0	120		34.79	120	0	120	0		32.78	60	0	0	60
27.17	60	60	0	0		34.92	60	60	0	0		33.25	120	120	0	0
27.56	120	0	120	0		35.27	120	0	120	0		33.78	120	0	0	120
27.84	120	0	120	0		36.23	120	0	120	0		34.23	120	120	0	0
28.53	60	0	0	60		36.45	120	120	0	0		34.78	60	0	0	60
28.76	120	120	0	0		38.29	120	0	0	120		36.81	120	0	120	0
29.62	120	0	120	0		38.91	60	0	0	60		36.88	120	0	120	0
29.87	120	0	120	0		38.98	240	120	120	0		37.81	120	0	120	0
30.12	60	60	0	0		39.85	120	0	120	0		37.88	120	0	120	0
30.26	60	60	0	0		40.27	120	0	120	0		37.9	60	60	0	0
30.68	120	120	0	0		40.49	60	60	0	0		38.61	120	120	0	0
30.92	120	0	0	120		41.27	120	120	0	0		39.28	60	60	0	0
31.24	120	0	120	0		42.08	60	60	0	0		40.12	120	0	0	120
31.31	60	60	0	0		42.71	120	0	120	0		41.08	60	60	0	0
32.6	120	0	120	0		42.83	60	0	0	60		41.15	120	0	0	120
32.94	180	60	0	120		43.02	60	60	0	0		41.31	120	120	0	0
32.98	120	0	120	0		43.34	240	0	120	120		41.57	60	60	0	0
33.76	120	120	0	0		43.54	60	60	0	0		41.92	120	0	120	0
34.14	120	0	120	0		44.76	120	0	120	0		42.6	120	0	120	0
34.48	60	60	0	0		45.47	120	0	120	0		42.7	120	0	120	0
34.53	120	0	120	0		45.63	120	120	0	0		43.34	120	0	120	0
34.89	120	0	120	0		45.7	120	0	120	0		45.01	60	60	0	0
35.02	180	0	120	60		46.16	120	0	120	0		45.36	120	0	120	0
35.41	30	30	0	0		46.86	120	0	0	120		45.38	120	120	0	0
35.53	30	30	0	0		47.29	180	60	120	0		45.58	120	0	120	0
35.57	120	0	120	0		47.59	30	30	0	0		45.62	120	0	120	0
36.57	120	0	0	120		48.13	30	30	0	0		45.73	60	60	0	0
37.58	120	0	120	0		48.21	120	0	120	0		45.75	60	0	0	60
37.93	60	0	0	60		48.9	60	0	0	60		45.87	120	0	120	0
38.28	120	0	120	0		49.77	120	0	0	120		46.5	120	0	0	120
38.49	120	0	120	0		50.06	60	0	0	60		47.21	60	0	0	60
38.64	60	0	0	60		50.12	120	0	120	0		47.7	30	30	0	0
39.07	120	0	0	120		50.46	120	0	120	0		47.72	30	30	0	0
39.11	120	0	120	0		51.45	60	0	0	60		49.51	60	0	0	60
39.66	60	0	0	60		51.98	120	0	120	0		49.66	120	0	120	0
40.25	60	0	60	0		52.5	60	0	60	0		49.76	120	0	0	120
40.36	60	0	60	0		52.84	60	0	0	60		50.01	120	0	120	0
42.16	60	0	0	60		52.99	60	0	60	0		50.03	60	0	0	60
42.95	120	0	0	120		54.91	120	0	0	120		50.06	120	0	120	0
43.67	60	0	0	60		56.63	60	0	0	60		50.4	120	0	120	0
45.1	30	0	0	30		57.41	30	0	0	30		52.57	60	0	60	0
45.19	30	0	0	30		57.86	30	0	0	30		52.59	60	0	60	0
												54.26	60	0	0	60
												54.65	120	0	0	120
												55.03	60	0	0	60
												57.45	30	0	0	30
												57.47	30	0	0	30

## Sheet: Tet2Di4
BDC linker						PBDC (outer) linker						PBDC (inner) linker
FG-FG distance (Å)	Count*	In-In*	In-Out*	Out-Out*		FG-FG distance (Å)	Count*	In-In*	In-Out*	Out-Out*		FG-FG distance (Å)	Count*	In-In*	In-Out*	Out-Out*		*multiply by	16
3.68	8	8	0	0		3.81	8	8	0	0		3.88	8	8	0	0
4.7	8	8	0	0		5.39	4	4	0	0		4.12	8	8	0	0
5.2	4	4	0	0		8.07	16	0	16	0		5.49	4	4	0	0
5.97	4	4	0	0		8.12	8	8	0	0		5.66	4	4	0	0
7.88	16	0	16	0		8.97	4	4	0	0		8.1	16	0	16	0
8.4	16	0	16	0		10.3	8	0	8	0		8.23	16	0	16	0
10.04	8	0	8	0		10.75	8	0	0	8		10.37	8	0	8	0
10.46	8	0	8	0		10.81	16	0	16	0		10.47	8	0	8	0
10.53	8	0	0	8		12.56	8	0	8	0		10.78	8	0	0	8
10.92	8	0	0	8		12.95	8	0	0	8		10.88	8	0	0	8
14.89	4	0	0	4		15.21	4	0	0	4		15.25	4	0	0	4
15.17	4	0	0	4		16.84	4	0	0	4		15.32	4	0	0	4

## Sheet: Tet3Di3
BDC linker						PBDC (outer) linker						PBDC (inner) linker
FG-FG distance (Å)	Count*	In-In*	In-Out*	Out-Out*		FG-FG distance (Å)	Count*	In-In*	In-Out*	Out-Out*		FG-FG distance (Å)	Count*	In-In*	In-Out*	Out-Out*		*multiply by	256
4.02	6	6	0	0		4.55	6	6	0	0		4.59	6	6	0	0
5	6	6	0	0		5.33	6	6	0	0		4.79	6	6	0	0
6.55	6	6	0	0		7.01	6	6	0	0		7.87	12	0	12	0
7.43	12	0	12	0		7.86	12	0	12	0		8	12	0	12	0
7.69	6	6	0	0		8.29	6	0	0	6		8.31	6	6	0	0
7.87	6	0	0	6		8.48	6	6	0	0		8.32	6	0	0	6
7.97	12	0	12	0		9.71	12	0	12	0		8.44	6	0	0	6
8.36	6	0	0	6		10.66	12	0	12	0		9.07	12	12	0	0
8.43	12	12	0	0		10.86	12	12	0	0		9.49	6	6	0	0
9.34	12	12	0	0		11	6	0	0	6		9.68	6	6	0	0
9.51	6	6	0	0		11.49	12	0	12	0		10.17	12	12	0	0
10.33	6	6	0	0		11.77	12	12	0	0		10.72	6	6	0	0
10.83	12	0	12	0		12.49	6	6	0	0		12.55	12	0	12	0
12.01	12	0	12	0		13.16	6	0	0	6		13.09	12	0	12	0
12.21	12	0	12	0		13.29	6	6	0	0		13.47	12	0	12	0
12.97	12	0	12	0		13.58	12	0	12	0		13.91	12	0	12	0
13.27	12	0	12	0		14.91	12	0	12	0		13.99	12	0	12	0
13.67	12	0	12	0		15.5	12	0	12	0		14.48	12	0	12	0
14.14	12	0	12	0		15.56	6	0	0	6		14.82	12	0	12	0
14.33	6	0	0	6		16.67	12	0	12	0		15.22	12	0	12	0
14.78	12	0	12	0		16.7	12	0	12	0		16.08	6	0	0	6
15.94	12	0	0	12		17.79	12	0	12	0		16.85	12	0	0	12
16.35	6	0	0	6		17.9	12	0	0	12		17.53	6	0	0	6
17.16	6	0	0	6		19.73	12	0	0	12		18.1	6	0	0	6
17.77	12	0	0	12		20.39	6	0	0	6		18.79	12	0	0	12
18.88	6	0	0	6		22.01	6	0	0	6		19.4	6	0	0	6

## Sheet: Tet4-4Di8
BDC linker						PBDC (outer) linker						PBDC (inner) linker
FG-FG distance (Å)	Count*	In-In*	In-Out*	Out-Out*		FG-FG distance (Å)	Count*	In-In*	In-Out*	Out-Out*		FG-FG distance (Å)	Count*	In-In*	In-Out*	Out-Out*		*multiply by	4096
5.23	8	8	0	0		4.25	8	8	0	0		6.54	8	8	0	0
5.37	8	8	0	0		6.49	8	8	0	0		6.69	8	8	0	0
5.99	8	8	0	0		7.76	8	8	0	0		8.42	8	8	0	0
7.49	8	8	0	0		8.26	16	0	16	0		9.45	16	16	0	0
7.67	16	16	0	0		9.68	8	8	0	0		9.8	16	0	16	0
8.6	16	0	16	0		9.79	16	0	16	0		9.9	16	0	16	0
9.08	16	0	16	0		10.37	8	0	0	8		10.37	8	8	0	0
9.24	24	8	16	0		10.61	16	16	0	0		10.66	8	8	0	0
9.33	8	8	0	0		11.04	8	0	0	8		11.05	8	0	0	8
9.43	8	8	0	0		11.83	16	0	16	0		11.15	8	0	0	8
9.59	8	0	0	8		12.15	16	0	16	0		11.49	16	16	0	0
10.03	8	0	0	8		12.44	16	16	0	0		12.07	16	0	16	0
10.46	8	8	0	0		12.79	16	0	16	0		12.27	8	8	0	0
10.76	24	8	16	0		13.19	16	8	0	8		12.85	16	0	16	0
10.87	8	8	0	0		14.4	8	8	0	0		13.27	16	0	16	0
11.52	8	0	0	8		14.7	8	8	0	0		13.29	8	8	0	0
11.65	24	8	16	0		15.01	24	8	16	0		13.36	8	8	0	0
11.87	16	0	16	0		15.14	8	0	0	8		13.98	16	0	16	0
12.08	8	8	0	0		15.34	16	0	16	0		14.48	8	0	0	8
12.89	16	0	16	0		15.79	8	8	0	0		14.76	16	0	16	0
13.08	16	0	16	0		16.31	24	8	0	16		14.81	8	8	0	0
13.72	16	0	0	16		17.23	16	0	16	0		14.88	8	8	0	0
13.82	16	0	16	0		17.69	16	0	16	0		15.41	16	0	16	0
14.87	16	0	16	0		17.91	16	0	16	0		15.54	16	0	0	16
14.98	24	0	16	8		19.1	16	0	16	0		15.76	16	0	16	0
15.29	16	0	16	0		19.61	32	0	16	16		16.36	16	0	16	0
15.61	8	0	0	8		19.81	16	0	16	0		16.54	8	0	0	8
16.57	16	0	16	0		20.6	8	0	0	8		17.75	16	0	16	0
16.74	16	0	0	16		20.89	16	0	16	0		17.81	16	0	16	0
16.85	16	0	16	0		21.9	8	0	0	8		18.21	8	0	0	8
18.33	8	0	0	8		23.06	8	0	0	8		19.07	16	0	0	16
19.19	8	0	0	8		23.37	8	0	0	8		19.69	16	0	16	0
19.43	8	0	0	8		24.52	8	0	0	8		19.74	16	0	16	0
21.45	8	0	0	8		25.57	8	0	0	8		19.89	8	0	0	8
21.67	8	0	0	8								21.93	8	0	0	8
												21.98	8	0	0	8
												24.56	8	0	0	8
												24.6	8	0	0	8

## Sheet: Tet5Di10
BDC linker						PBDC (outer) linker						PBDC (inner) linker
FG-FG distance (Å)	Count*	In-In*	In-Out*	Out-Out*		FG-FG distance (Å)	Count*	In-In*	In-Out*	Out-Out*		FG-FG distance (Å)	Count*	In-In*	In-Out*	Out-Out*		*multiply by	65536
4.35	10	10	0	0		6.57	10	10	0	0		6.6	10	10	0	0
5.25	10	10	0	0		6.89	10	10	0	0		6.74	10	10	0	0
5.89	10	10	0	0		9.35	20	0	20	0		9.35	20	0	20	0
7.21	10	0	0	10		9.52	10	10	0	0		9.45	20	0	20	0
7.32	10	10	0	0		9.64	10	0	0	10		9.64	10	0	0	10
7.41	20	0	20	0		9.71	10	10	0	0		9.75	10	0	0	10
7.77	10	0	0	10		10.44	20	0	20	0		11.63	10	10	0	0
7.96	20	0	20	0		11.78	20	0	20	0		12.75	20	20	0	0
8.45	20	20	0	0		12.03	10	0	0	10		13.37	10	10	0	0
9.5	40	20	20	0		12.33	10	0	0	10		13.83	10	10	0	0
10.65	10	10	0	0		13.13	20	0	20	0		14.36	20	20	0	0
11.04	20	0	20	0		13.35	20	20	0	0		14.89	20	0	20	0
11.25	20	0	20	0		14.88	20	20	0	0		15.32	10	10	0	0
11.39	10	0	0	10		15.52	20	0	20	0		15.82	20	0	20	0
11.51	10	10	0	0		15.65	10	0	0	10		16.16	20	0	20	0
12.38	20	0	20	0		17.41	40	0	40	0		16.89	20	0	20	0
12.48	10	10	0	0		18.29	10	10	0	0		17.02	10	0	0	10
12.56	20	0	20	0		18.45	10	10	0	0		17.06	20	0	20	0
13.21	10	10	0	0		18.64	20	0	0	20		17.72	20	0	20	0
13.48	10	0	0	10		19.14	20	0	20	0		18.02	20	0	20	0
13.59	20	0	20	0		19.43	10	10	0	0		18.19	20	0	0	20
13.68	20	20	0	0		19.58	10	10	0	0		18.83	20	0	20	0
13.82	20	0	0	20		20.98	20	0	0	20		19.32	10	0	0	10
13.94	20	0	20	0		21.6	40	20	20	0		19.56	10	0	0	10
14.3	10	10	0	0		22.57	20	20	0	0		20.17	10	10	0	0
14.35	20	20	0	0		22.71	10	10	0	0		20.59	20	0	0	20
14.94	10	10	0	0		22.82	20	0	20	0		20.63	20	20	0	0
15.02	20	0	20	0		23.02	20	0	20	0		21.01	10	10	0	0
15.59	20	0	0	20		23.64	10	10	0	0		21.23	10	10	0	0
16.04	10	0	0	10		23.98	10	0	0	10		21.6	10	0	0	10
17.01	20	0	20	0		24.16	20	0	20	0		21.66	20	20	0	0
17.59	10	0	0	10		25.56	20	0	20	0		22.02	10	10	0	0
17.89	40	0	40	0		25.84	10	0	0	10		24.66	20	0	20	0
18.34	20	0	20	0		26.31	20	0	20	0		25.05	20	0	20	0
18.74	20	0	20	0		26.77	20	0	20	0		25.19	20	0	20	0
18.8	20	0	20	0		27.15	10	0	0	10		25.51	20	0	20	0
19.18	20	0	20	0		27.23	20	0	20	0		25.92	20	0	20	0
19.62	20	0	20	0		27.48	20	0	20	0		26.29	20	0	20	0
21.3	10	0	0	10		28.37	20	0	20	0		26.42	20	0	20	0
22.36	20	0	0	20		28.81	10	0	0	10		26.73	20	0	20	0
22.49	10	0	0	10		30.16	20	0	0	20		28.96	10	0	0	10
23.08	10	0	0	10		31.6	10	0	0	10		29.44	20	0	0	20
23.49	20	0	0	20		31.66	20	0	0	20		29.84	10	0	0	10
24.18	10	0	0	10		33.03	10	0	0	10		30.53	10	0	0	10
												30.98	20	0	0	20
												31.36	10	0	0	10

[truncated: 5 more sheets: Tet6Di12, Tet8Di16, Tet16Di32, Tet24Di48, Disk Space]
