# Supplementary material for: Machine learning of isomerization in porous molecular frameworks: exploring functional group pair distance distributions
Source: Royal Society of Chemistry journal article supplement (doi:10.1039/d3qi01065a), 2023-01-01
Supplement: d3qi01065a5.pdf [file d3qi01065a5.pdf]

## Supporting Information

# Functional Group Pair Distance based Descriptor for Isomerisation in Porous Molecular Framework Materials

Maryam Nurhuda<sup>a</sup>, Yusuf Hafidh<sup>b</sup>, Cansu Dogan<sup>a</sup>, Daniel Packwood<sup>c</sup>, Carole C. Perry<sup>a</sup>, Matthew A. Addicoat<sup>a\*</sup>

<sup>a</sup> *School of Science and Technology, Nottingham Trent University, Clifton Lane, Nottingham NG11 8NS*

<sup>b</sup> *Department of Mathematics, Bandung Institute of Technology, Jl. Ganesa 10 Bandung - Jawa Barat, Indonesia*

<sup>c</sup> *Kyoto Univ, Inst Integrated Cell Mat Sci, Inst Adv Study, Kyoto 6068501, Japan*

Supporting Information:

S0 [Motivation](#)

S1 Number of isomers of each pore topology arising from different functional group arrangements.

S2 Number of  $Tet^2Di^4$  Unique Isomer Calculation Using Group Theory

S3 Algorithm for Isomer enumeration.

S4 Enumeration and analysis of 2D  $D_{4h}$  cage

S5 Histograms of the functional group - functional group distances of every pore topology.

S6 Functional Group - Functional Group distance Histogram of  $Tet^2Di^4$  Isomers.

S7 The effect of rotation on functional group distances.

S8 Kernel Density Estimation on Histograms

S9 Principal Component Analysis

S10 Representative isomers of  $NH_2$ -UiO-66 Oh Cage for the Machine Learning Input.

S11 Machine Learning method

# S1 Number of isomers of each pore topology arising from different functional group arrangements

| Pore topology      | Number of Isomers    |
|--------------------|----------------------|
| $Tri^2 Di^3$       | 10                   |
| $Tri^4 Di^6$       | 176                  |
| $Tri_2^4 Di^6$     | 568                  |
| $Tri^6 Di^9$       | 21856                |
| $Tri^8 Di^{12}$    | 351976               |
| $Tri^{20} Di^{30}$ | 9607679214180672     |
| $Tet^2 Di^4$       | 31                   |
| $Tet_3^3 Di^3$     | 366                  |
| $Tet_4^4 Di^8$     | 4244                 |
| $Tet^5 Di^{10}$    | 52740                |
| $Tet^6 Di^{12}$    | 354024               |
| $Tet^8 Di^{16}$    | 268439588            |
| $Tet^{16} Di^{32}$ | 17592195482624       |
| $Tet^{24} Di^{48}$ | 1.650586719047232e27 |

Table S1: Number of isomers arising from different arrangement of functional group position of pore cage structure, functionalisation is based on one functional group per linker.

## S2 Example of Unique Isomer Calculation Using Group Theory

we consider  $Tet^2Di^4$ , the pore has point group  $D_{4h}$  with 16 symmetry elements:

$$G = E, 2 \cdot C_4, C_2, 2 \cdot C'_2, 2 \cdot C''_2, \\ i, 2 \cdot S_4, \sigma_h, 2 \cdot \sigma_v, 2 \cdot \sigma_d$$

and the number of possible structures is:

$$H = 4^{n_{linkers}} = 4^4 = 256$$

Then the total number,  $n$  of unique structures is calculated as:

$$n = \frac{1}{16} [\chi(E) + 2 \bullet \chi(C_4) + \chi(C_2) + 2 \bullet \chi(C'_2) \\ + 2 \bullet \chi(C''_2) + \chi(i) + 2 \bullet \chi(S_4) + \chi(\sigma_h) \\ + 2 \bullet \chi(\sigma_v) + 2 \bullet \chi(\sigma_d)] = 31 \quad (S1)$$

with each term of  $\chi(x)$  of the symmetry elements equal to:

$$\begin{array}{ll} \chi(E) = 256 & \chi(C_4) = 4 \\ \chi(C_2) = 16 & \chi(C'_2) = 16 \\ \chi(C''_2) = 4 & \chi(i) = 16 \\ \chi(S_4) = 16 & \chi(\sigma_h) = 0 \\ \chi(\sigma_v) = 0 & \chi(\sigma_d) = 64 \end{array}$$

## S3 Algorithm of Isomer Enumeration

### Step 1: Preparation

Step 1a: Labelling each functional group slot with an index.

In this step, the pore structures are installed with full functionalisation, which means all hydrogen atoms in the benzene linker are replaced by a functional group (FG). Then each functional group slot is labelled by an index named as FG\_id. FG\_id in the same linker need to be in a sequence of 4 consecutive numbers, as shown in Figure S1 .

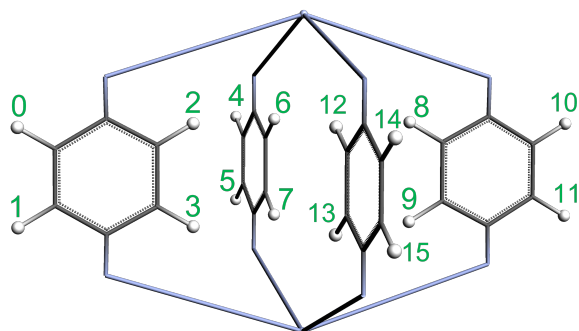

Figure S1: Pore  $Tet^2Di^4$  with assigned index for each functional group, functional group slot is shown in blue circles.

Step 1b: Generating a transformation library.

After indexing each FG slot, symmetry operations are applied to the pore. Again,  $Tet^2Di^4$  is used as an example,  $Tet^2Di^4$  has point group of  $D_{4h}$  with 16 symmetry elements. Therefore, the pore is transformed 16 times. After every transformation, the new structure is compared to the original pore structure to list the FG\_id position of the new structure, this information is stored in a table which we refer to as the transformation library (will be used in the next step). In the transformation library, the first column represents the initial position of FG. The columns after are the transformed (and projected) FG\_id for each symmetry operation. For the Tet2Di4 pore, the transformation library will be a table of dimension 16x16 (Figure S2). The 16 rows correspond to the 16 possible FG position, and the 16 columns correspond to the 16 symmetry elements.

| E  | C <sub>4</sub> | C <sub>2</sub> | C <sub>2</sub> ' | ..... | C <sub>2</sub> '' | σ <sub>h</sub> |
|----|----------------|----------------|------------------|-------|-------------------|----------------|
| 0  | 14             | 10             | 1                |       | 5                 | 1              |
| 1  | 15             | 11             | 0                |       | 4                 | 0              |
| 2  | 12             | 8              | 3                |       | 7                 | 3              |
| 3  | 13             | 9              | 2                |       | 6                 | 2              |
| 4  | 0              | 12             | 15               |       | 1                 | 5              |
| 8  | 6              | 2              | 9                |       | 13                | 9              |
| 12 | 8              | 6              | 7                |       | 9                 | 13             |
| 15 | 11             | 5              | 4                |       | 10                | 14             |

Figure S2: (right) Symmetry elements of pore  $Tet^2Di^4$  (only 5 from the 16 are shown) (left) Transformation library, library of each functional group index and the transformed index, the first column represents the initial position, each subsequent column represent a specified symmetry operation, double lines represent hidden rows.

Generating a transformation library beforehand is useful for tracking the possible symmetry transformations of the pore, specifically in cutting down repetitive transformations (of the pore) each of which involve multiplication of the xyz coordinate matrices and transformation matrices which can become highly computationally costly.

## Step 2: Enumeration of all possible functional group arrangement.

Using the example of  $Tet^2Di^4$  pore, as each linker is installed with one functional group, the pore isomers will have 4 functional groups. The isomers are encoded to a string of 4 FG\_id and also encoded to an equivalent single integer isomer\_id, defined by Equation S2. All possible combinations of FG\_id are listed (an example is shown in S3). Along with that, a unique flag list is prepared to mark the unique isomers Figure 5.10.

$$\text{isomer\_id} = \sum_{\text{FG\_id}} (\text{FG\_id} \% 4) \bullet 4^{\text{int}(\frac{\text{FG\_id}}{4})} \quad (\text{S2})$$

| Isomer_Id | FG_id |   |    |    | Unique? |
|-----------|-------|---|----|----|---------|
| 0         | 0     | 4 | 8  | 12 | yes/no  |
| 1         | 1     | 4 | 8  | 12 | yes/no  |
| 2         | 2     | 4 | 8  | 12 | yes/no  |
| 3         | 3     | 4 | 8  | 12 | yes/no  |
| 4         | 0     | 5 | 8  | 12 | yes/no  |
| 5         | 1     | 5 | 8  | 12 | yes/no  |
| 6         | 2     | 5 | 8  | 12 | yes/no  |
| ..        |       |   |    |    |         |
| 255       | 3     | 7 | 11 | 15 | yes/no  |

Figure S3: Example of functional group enumeration unique list

### Step 2a: Finding equivalent symmetry related isomers.

For each isomer, equivalent symmetry related isomers are determined by looking at the transformation library generated in step 2. For example, as illustrated in Figure S4, in the first isomer (isomer\_id=0), functionalisation is located at FG\_id 0-4-8-12, so the FG\_id rows are highlighted in green. Then, the highlighted green rows are copied into a new matrix and transposed. Each of the rows from the transpose matrix are the equivalent isomers.

| E  | C <sub>4</sub> | C <sub>2</sub> | C <sub>2</sub> ' | ..... | C <sub>2</sub> '' | σ <sub>h</sub> |
|----|----------------|----------------|------------------|-------|-------------------|----------------|
| 0  | 14             | 10             | 1                |       | 5                 | 1              |
| 1  | 15             | 11             | 0                |       | 4                 | 0              |
| 2  | 12             | 8              | 3                |       | 7                 | 3              |
| 3  | 13             | 9              | 2                |       | 6                 | 2              |
| 4  | 0              | 12             | 15               |       | 1                 | 5              |
| 8  | 6              | 2              | 9                |       | 13                | 9              |
| 12 | 8              | 6              | 7                |       | 9                 | 13             |
| 15 | 11             | 5              | 4                |       | 10                | 14             |

  

**Equivalent isomers:**

|    |    |    |    |
|----|----|----|----|
| 14 | 0  | 6  | 8  |
| 10 | 12 | 2  | 6  |
| 1  | 15 | 9  | 7  |
| .. |    |    |    |
| 5  | 1  | 13 | 9  |
| 1  | 5  | 9  | 13 |

Figure S4: Illustration of equivalent isomers determined from transformation list

Step 2b: Marking the unique flag list.

As illustrated in Figure S5, Isomer\_id 0 will be marked as unique in the unique flag list, while the equivalent isomers are marked as a duplicate. To search for the Ids of the equivalent isomers, the string of 4 FG\_ids is converted back to its isomer\_id by Equation S2. Steps 2a and 2b are repeated for the next unsigned unique flag list isomer until all isomer\_id in the unique flag list are marked.

| Equivalent isomers: |    |    |    | Isomer_id | Isomer_Id | FG_id | Unique? |    |     |  |
|---------------------|----|----|----|-----------|-----------|-------|---------|----|-----|--|
| 14                  | 0  | 6  | 8  | 136       | 0         | 4     | 8       | 12 | yes |  |
| 10                  | 12 | 2  | 6  | 42        | 1         | 4     | 8       | 12 |     |  |
| 1                   | 15 | 9  | 7  | 221       | 2         | 4     | 8       | 12 |     |  |
| ..                  |    |    |    |           | 3         | 4     | 8       | 12 |     |  |
| 5                   | 1  | 13 | 9  | 85        | 4         | 5     | 8       | 12 |     |  |
| 1                   | 5  | 9  | 13 | 85        | 5         | 5     | 8       | 12 |     |  |
|                     |    |    |    |           | 6         | 5     | 8       | 12 |     |  |
|                     |    |    |    |           | 42        | 6     | 10      | 12 | no  |  |
|                     |    |    |    |           | 85        | 1     | 5       | 13 | no  |  |
|                     |    |    |    |           | 136       | 0     | 6       | 14 | no  |  |
|                     |    |    |    |           | 221       | 1     | 7       | 15 | no  |  |
|                     |    |    |    |           | ..        |       |         |    |     |  |
|                     |    |    |    |           | 255       | 3     | 7       | 11 | 15  |  |

Figure S5: Example of functional group enumeration unique list

In huge pores with more than 12 ditopic linkers, the number of isomers exceeds the maximum size of a python list. Encoding and decoding the isomers has significantly reduced the computational load. The encoding also cuts the computational time that would be required to search for string containing  $n_{FG}$  numbers in a list of  $4^{n_{linker}}$  isomers.

## S4 Enumeration and analysis of 2D $D_{4h}$ cage

S5 Histograms of the functional group - functional group distances of every pore topology.

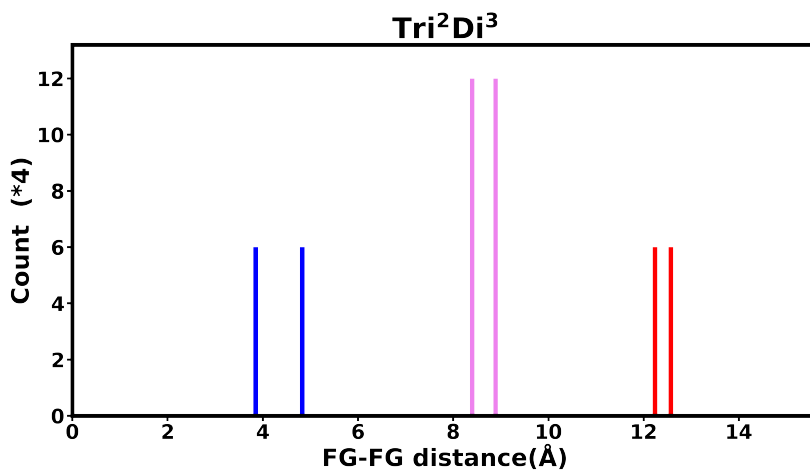

(a) Benzene-1,4-dicarboxylic acid linker

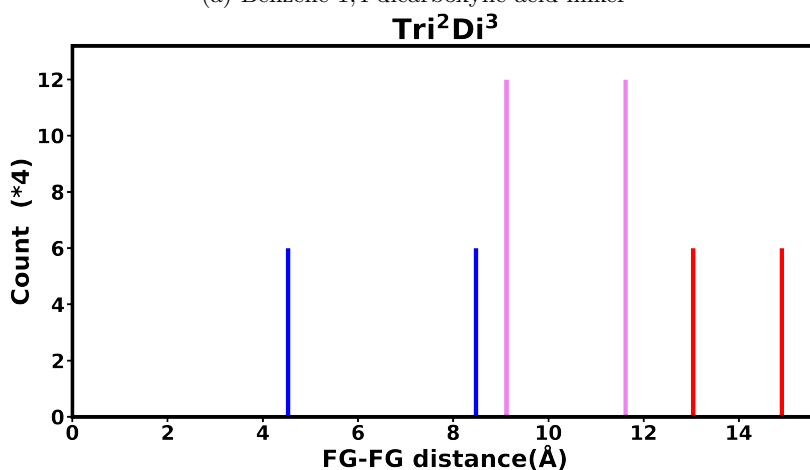

(b) Outer poly(1,4-benzenedicarboxylic acid) linker

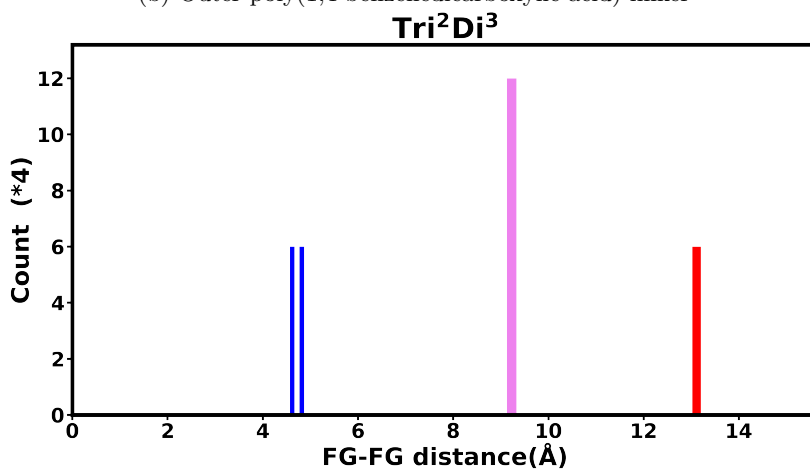

(c) Inner poly(1,4-benzenedicarboxylic acid) linker

Figure S6: Histogram of FG-FG distances in pore  $Tri^2Di^3$ , constructed from a node with radius  $5\text{\AA}$  and two different linker sizes, (a) benzene-1,4-dicarboxylic acid, (b) poly(1,4-benzenedicarboxylic acid) outer functional group positions (c) poly(1,4-benzenedicarboxylic acid) inner functional group positions.



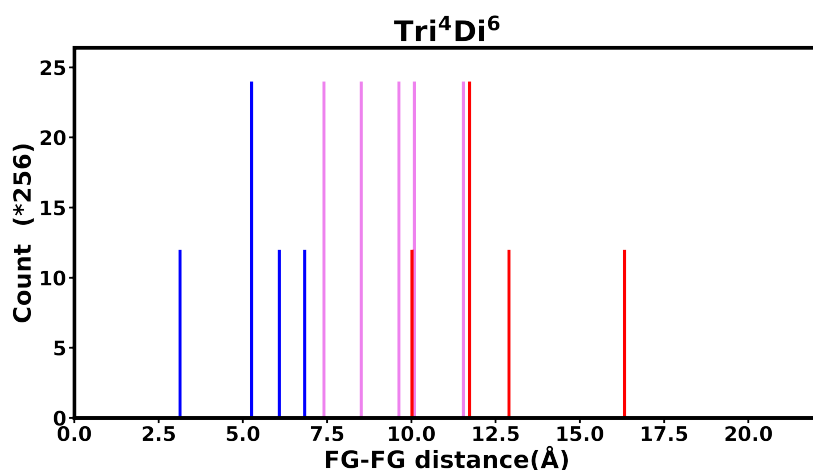

(a) Benzene-1,4-dicarboxylic acid linker

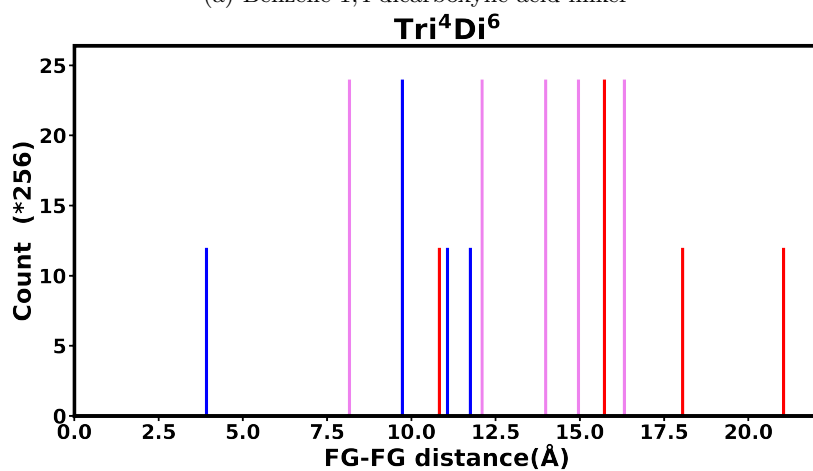

(b) Outer poly(1,4-benzenedicarboxylic acid) linker

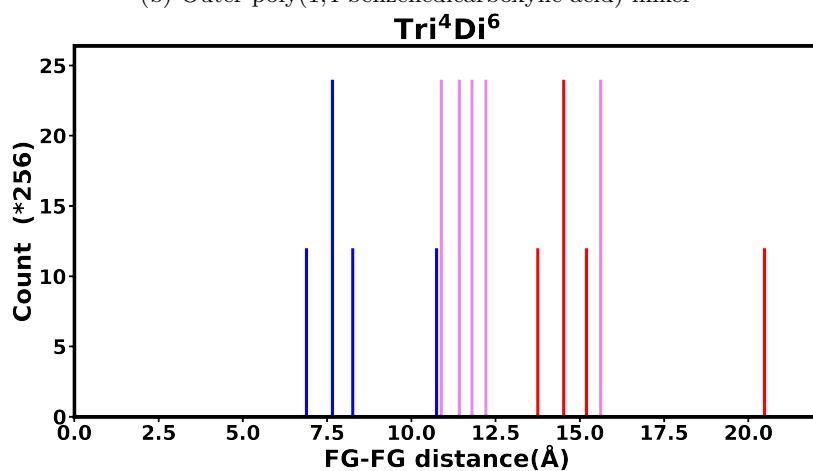

(c) Inner poly(1,4-benzenedicarboxylic acid) linker

Figure S7: Histogram of FG-FG distances in pore  $Tri^4Di^6$ , constructed from a node with radius  $5\text{\AA}$  and two different linker size, (a) benzene-1,4-dicarboxylic acid, (b) poly(1,4-benzenedicarboxylic acid) outer functional group positions (c) poly(1,4-benzenedicarboxylic acid) inner functional group positions.

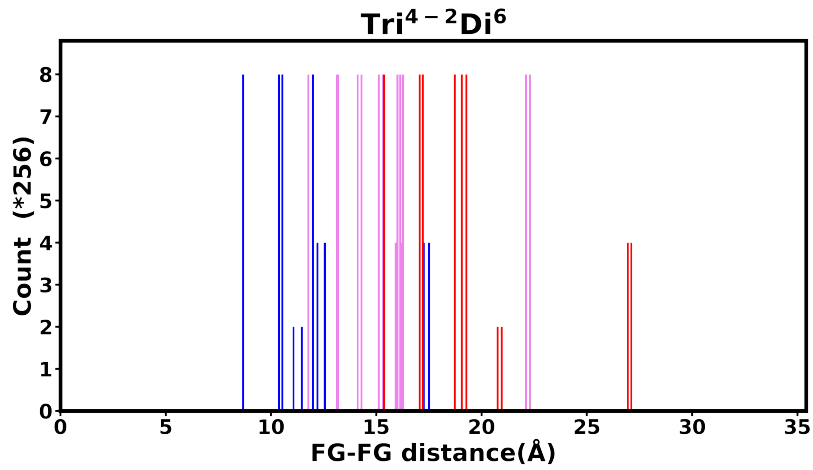

(a) Benzene-1,4-dicarboxylic acid linker

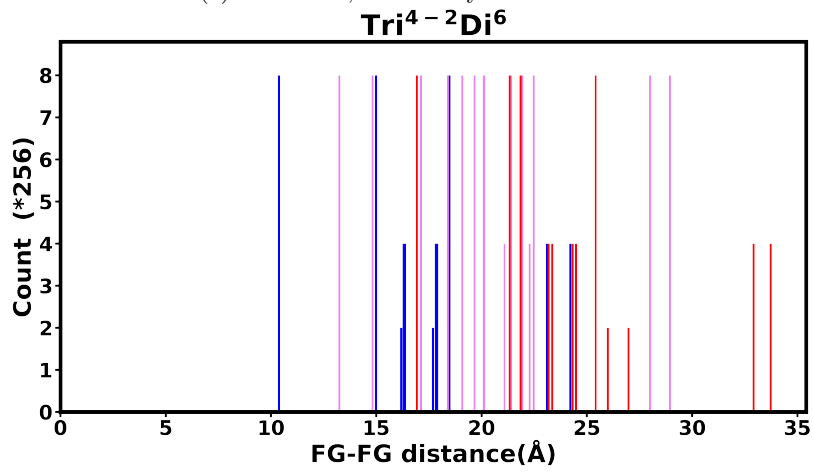

(b) Outer poly(1,4-benzenedicarboxylic acid) linker

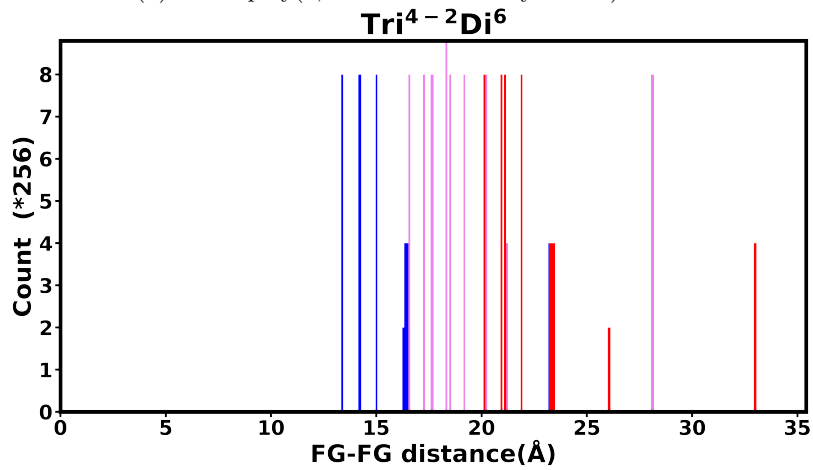

(c) Inner poly(1,4-benzenedicarboxylic acid) linker

Figure S8: Histogram of FG-FG distances in pore  $Tri_2^4Di^6$ , constructed from a node with radius  $5\text{\AA}$  and two different linker size, (a) benzene-1,4-dicarboxylic acid, (b) poly(1,4-benzenedicarboxylic acid) outer functional group positions (c) poly(1,4-benzenedicarboxylic acid) inner functional group positions.

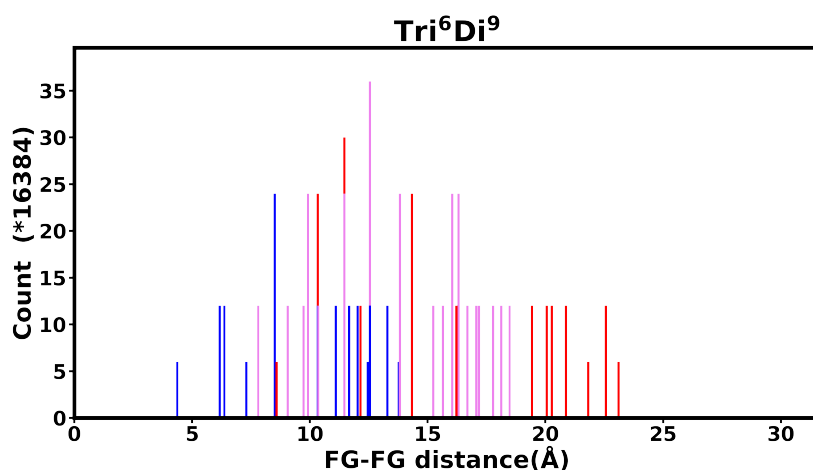

(a) Benzene-1,4-dicarboxylic acid linker

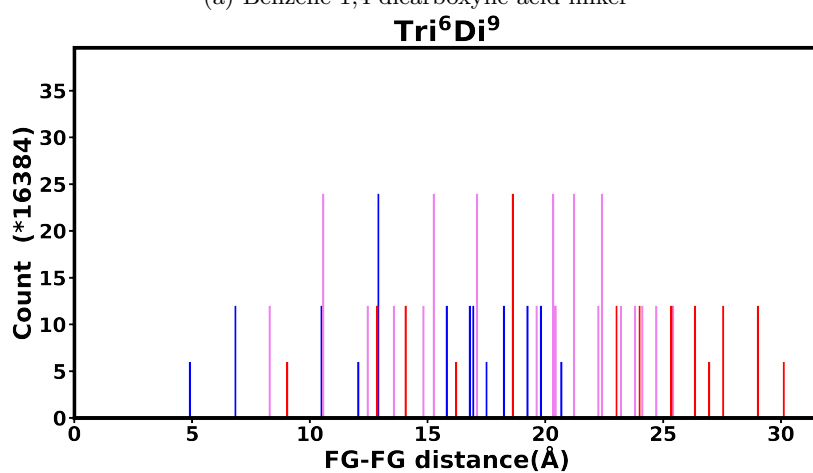

(b) Outer poly(1,4-benzenedicarboxylic acid) linker

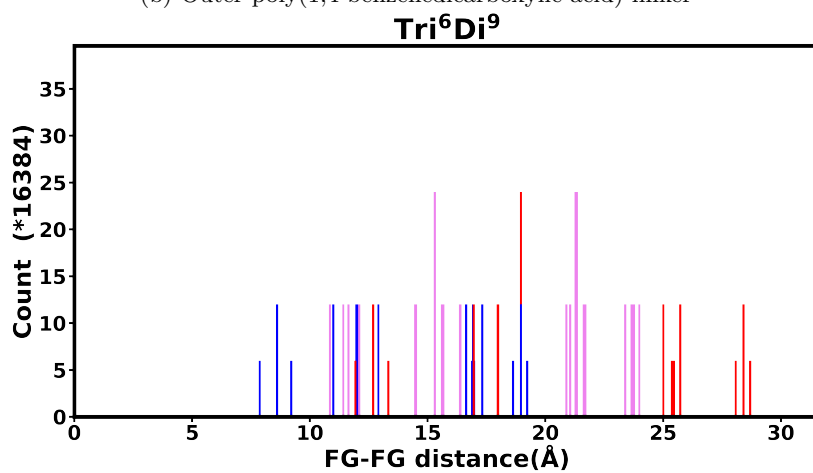

(c) Inner poly(1,4-benzenedicarboxylic acid) linker

Figure S9: Histogram of FG-FG distances in pore  $Tri^6Di^9$ , constructed from a node with radius  $5\text{\AA}$  and two different linker sizes, (a) benzene-1,4-dicarboxylic acid, (b) poly(1,4-benzenedicarboxylic acid) outer functional group positions (c) poly(1,4-benzenedicarboxylic acid) inner functional group positions.

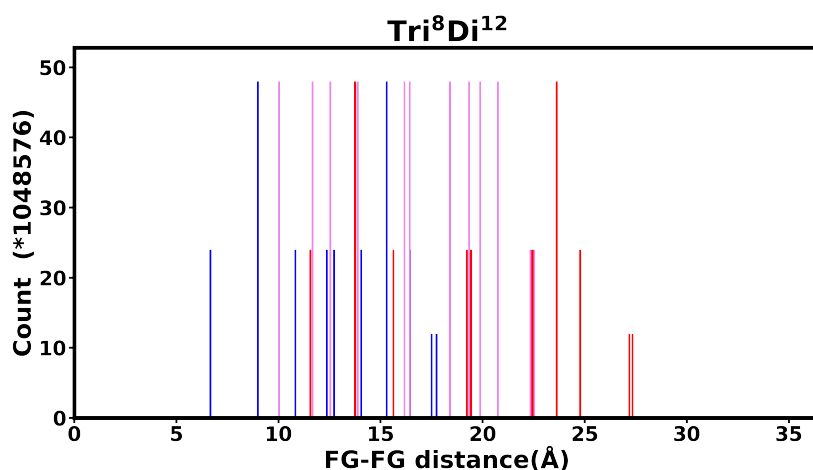

(a) Benzene-1,4-dicarboxylic acid linker

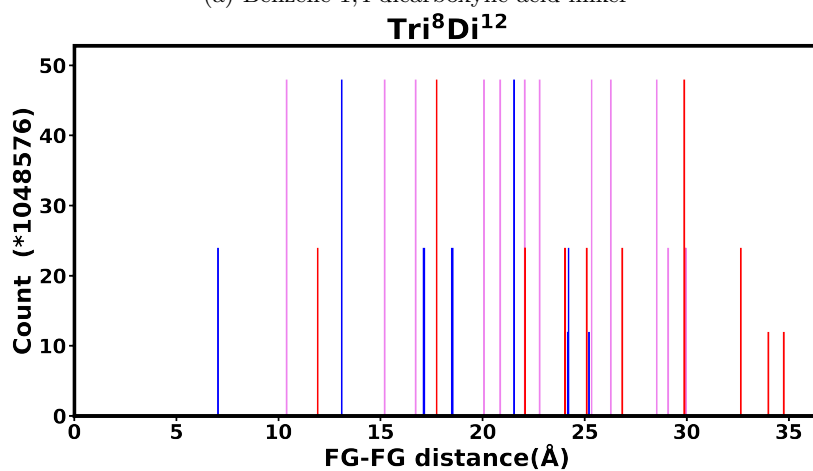

(b) Outer poly(1,4-benzenedicarboxylic acid) linker

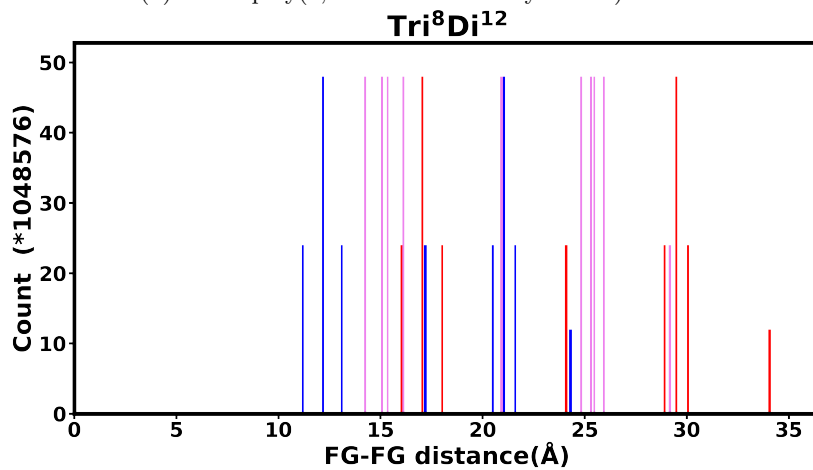

(c) Inner poly(1,4-benzenedicarboxylic acid) linker

Figure S10: Histogram of FG-FG distances in pore *Tri<sup>8</sup>Di<sup>12</sup>*, constructed from a node with radius 5Å and two different linker sizes, (a) benzene-1,4-dicarboxylic acid, (b) poly(1,4-benzenedicarboxylic acid) outer functional group positions (c) poly(1,4-benzenedicarboxylic acid) inner functional group positions.

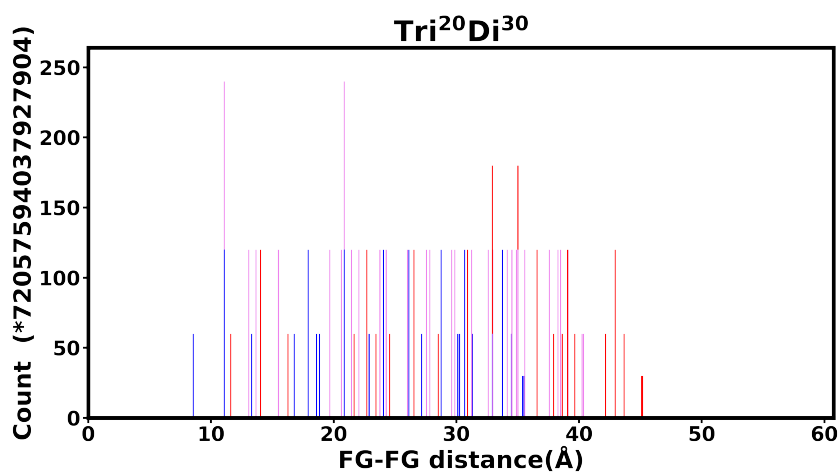

(a) Benzene-1,4-dicarboxylic acid linker

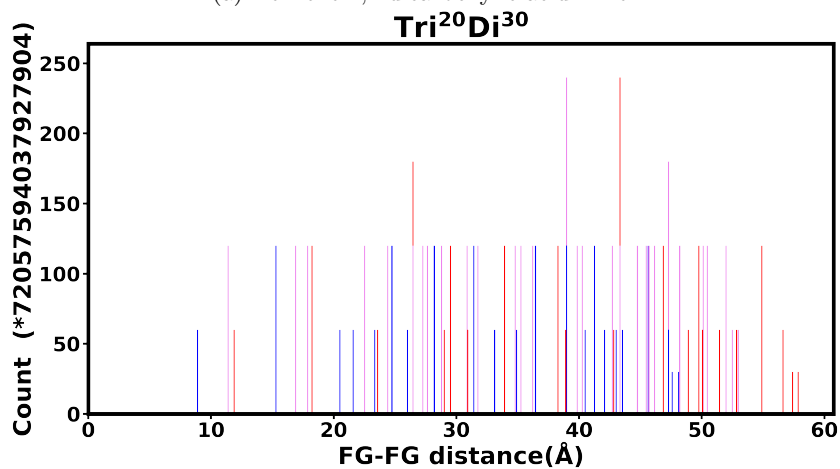

(b) Outer poly(1,4-benzenedicarboxylic acid) linker

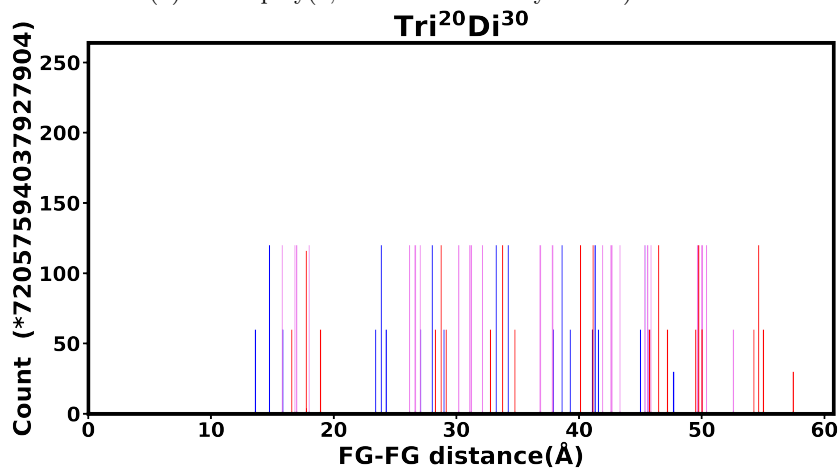

(c) Inner poly(1,4-benzenedicarboxylic acid) linker

Figure S11: Histogram of FG-FG distances in pore *Tri<sup>20</sup>Di<sup>30</sup>*, constructed from a node with radius 5Å and two different linker sizes, (a) benzene-1,4-dicarboxylic acid, (b) poly(1,4-benzenedicarboxylic acid) outer functional group positions (c) poly(1,4-benzenedicarboxylic acid) inner functional group positions.

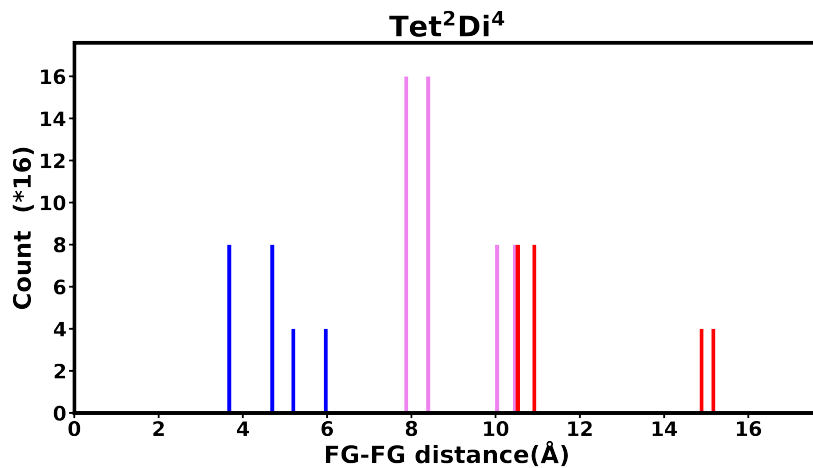

(a) Benzene-1,4-dicarboxylic acid linker

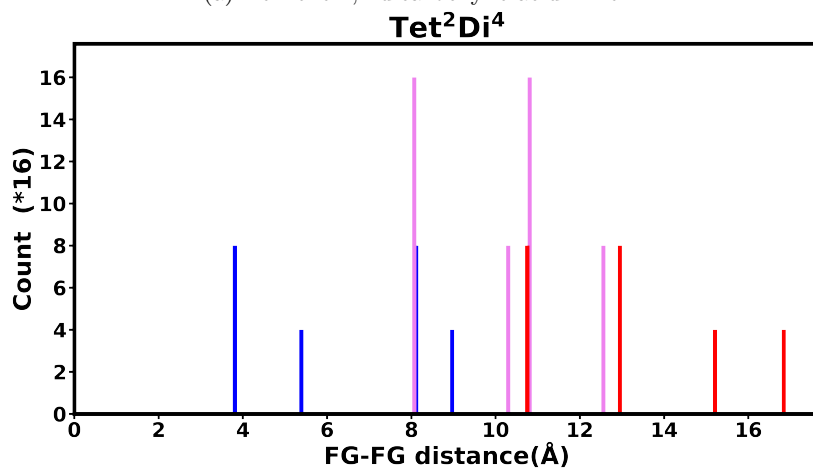

(b) Outer poly(1,4-benzenedicarboxylic acid) linker

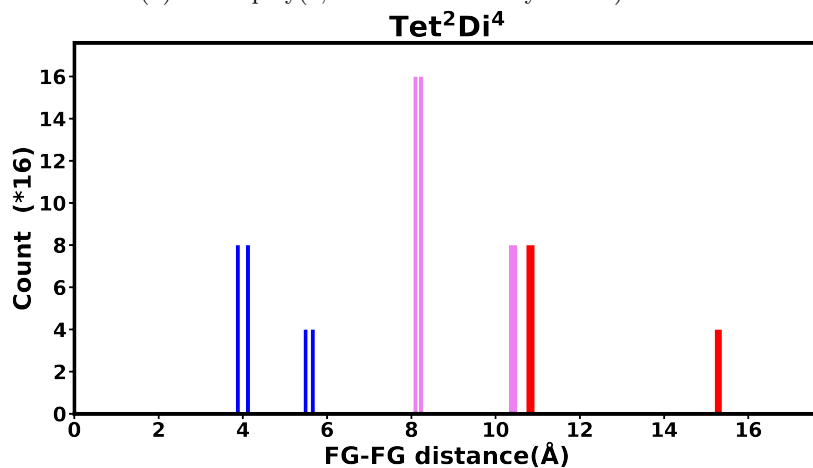

(c) Inner poly(1,4-benzenedicarboxylic acid) linker

Figure S12: Histogram of FG-FG distances in pore *Tet<sup>2</sup>Di<sup>4</sup>*, constructed from a node with radius 5Å and two different linker sizes, (a) benzene-1,4-dicarboxylic acid, (b) poly(1,4-benzenedicarboxylic acid) outer functional group positions (c) poly(1,4-benzenedicarboxylic acid) inner functional group positions.

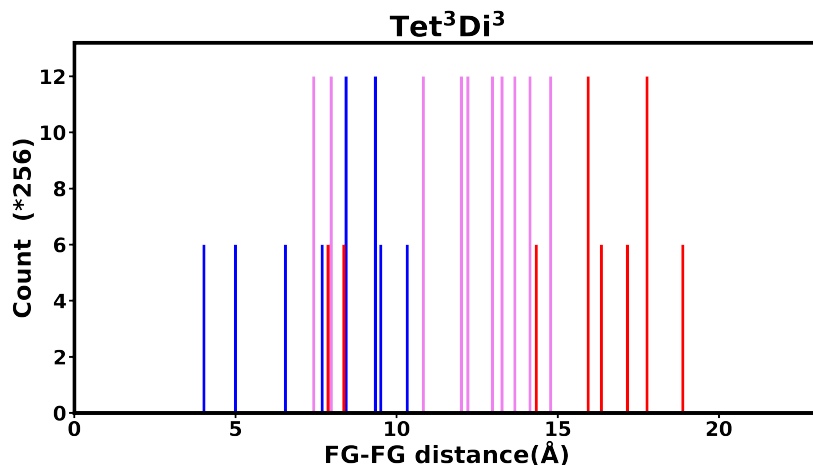

(a) Benzene-1,4-dicarboxylic acid linker

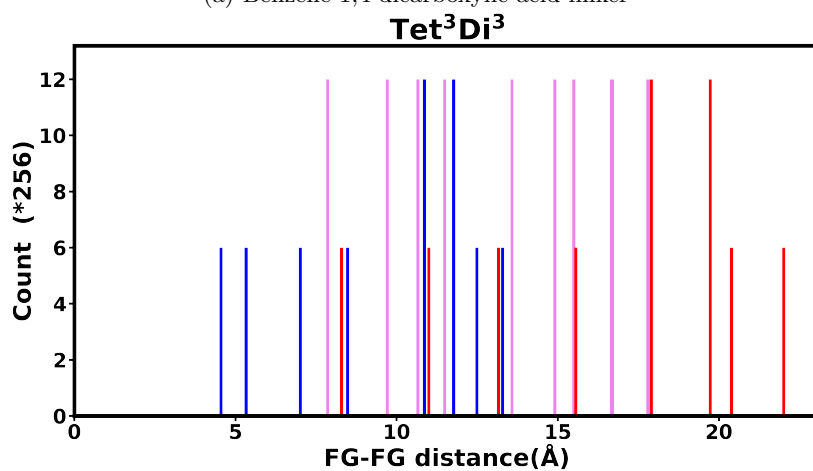

(b) Outer poly(1,4-benzenedicarboxylic acid) linker

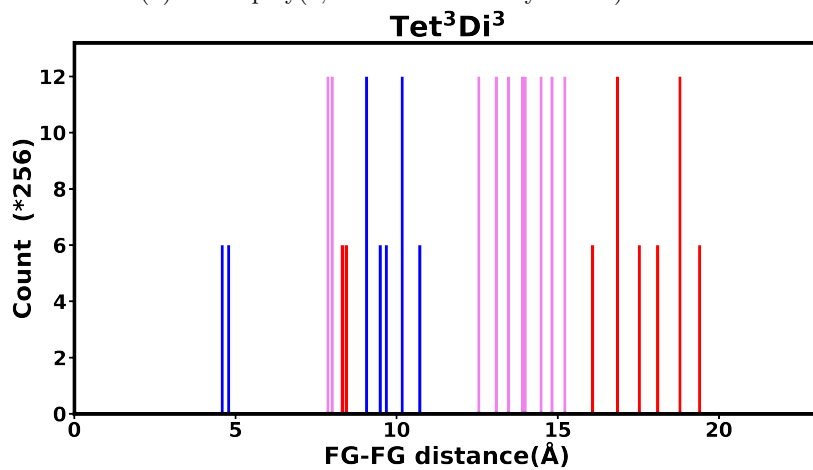

(c) Inner poly(1,4-benzenedicarboxylic acid) linker

Figure S13: Histogram of FG-FG distances in pore  $Tet^3Di^3$ , constructed from a node with radius 5Å and two different linker sizes, (a) benzene-1,4-dicarboxylic acid, (b) poly(1,4-benzenedicarboxylic acid) outer functional group positions (c) poly(1,4-benzenedicarboxylic acid) inner functional group positions.

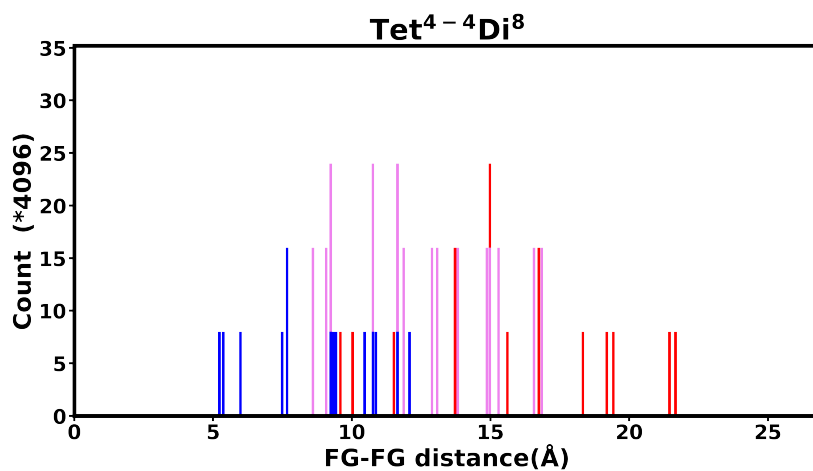

(a) Benzene-1,4-dicarboxylic acid linker

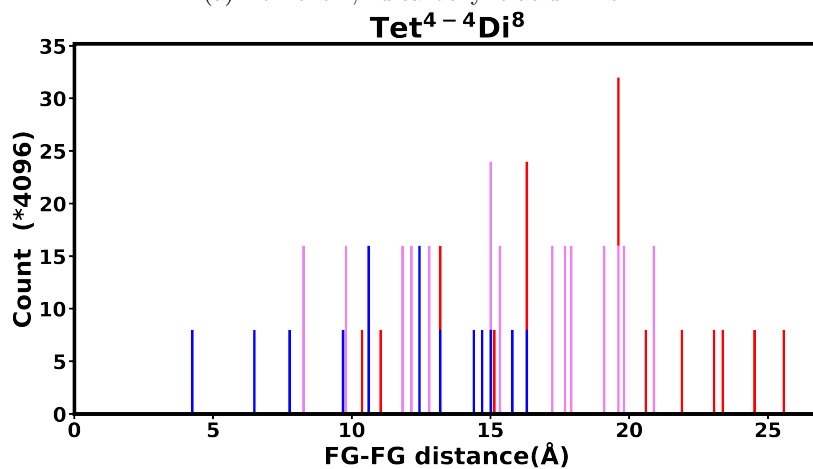

(b) Outer poly(1,4-benzenedicarboxylic acid) linker

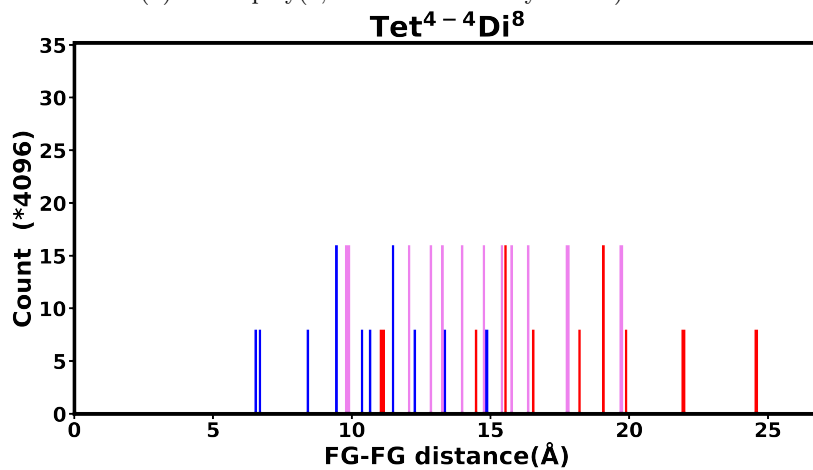

(c) Inner poly(1,4-benzenedicarboxylic acid) linker

Figure S14: Histogram of FG-FG distances in pore  $Tet_4^4Di^8$ , constructed from a node with radius 5Å and two different linker sizes, (a) benzene-1,4-dicarboxylic acid, (b) poly(1,4-benzenedicarboxylic acid) outer functional group positions (c) poly(1,4-benzenedicarboxylic acid) inner functional group positions.



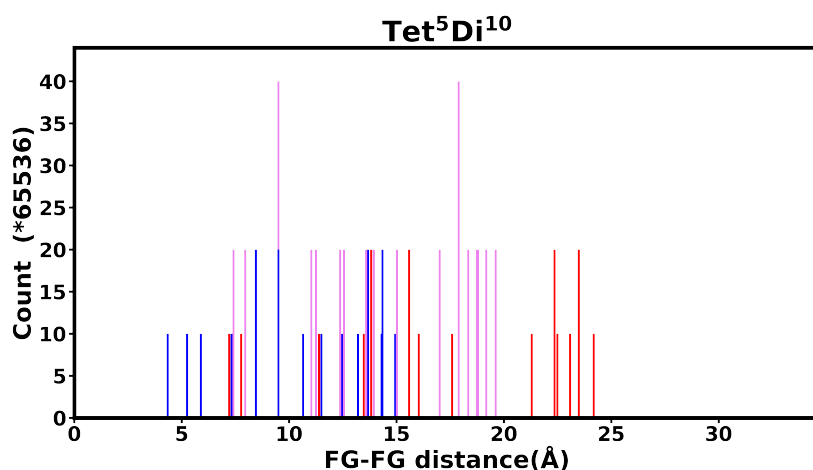

(a) Benzene-1,4-dicarboxylic acid linker

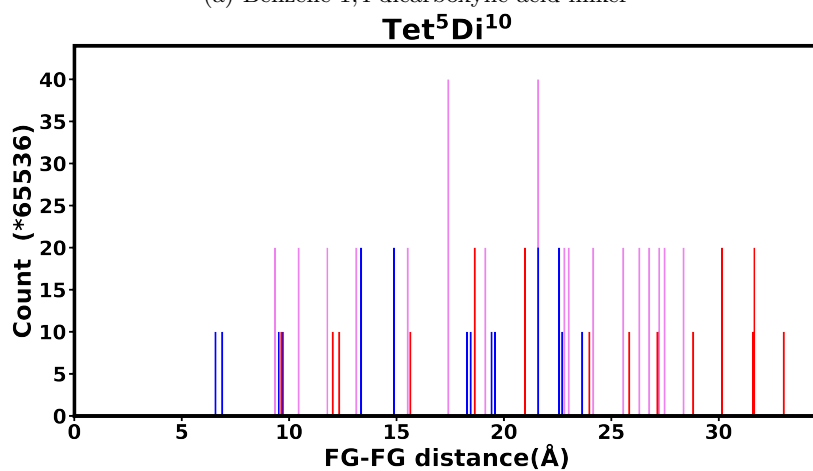

(b) Outer poly(1,4-benzenedicarboxylic acid) linker

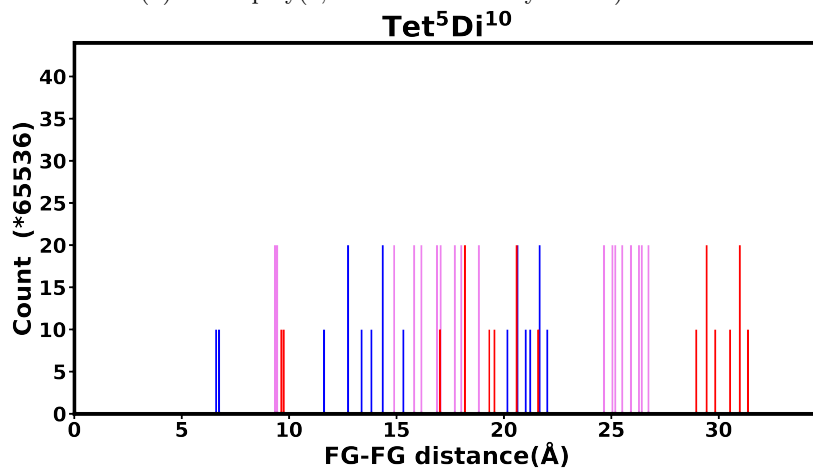

(c) Inner poly(1,4-benzenedicarboxylic acid) linker

Figure S15: Histogram of FG-FG distances in pore  $Tet^5Di^{10}$ , constructed from a node with radius  $5\text{\AA}$  and two different linker sizes, (a) benzene-1,4-dicarboxylic acid, (b) poly(1,4-benzenedicarboxylic acid) outer functional group positions (c) poly(1,4-benzenedicarboxylic acid) inner functional group positions.

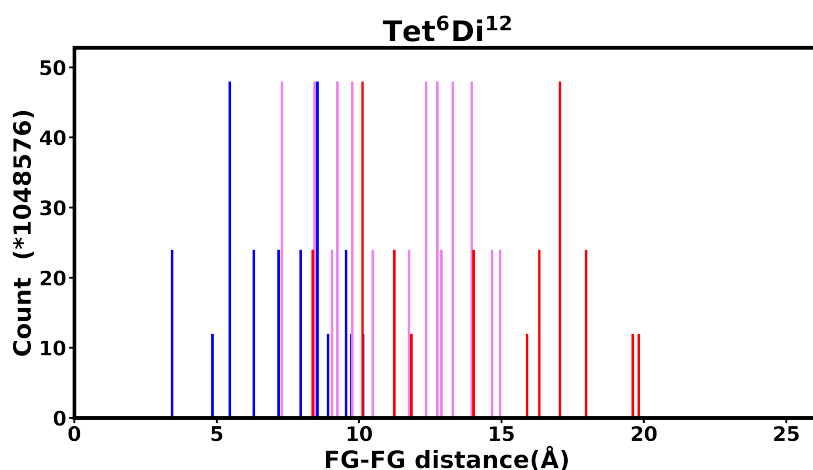

(a) Benzene-1,4-dicarboxylic acid linker

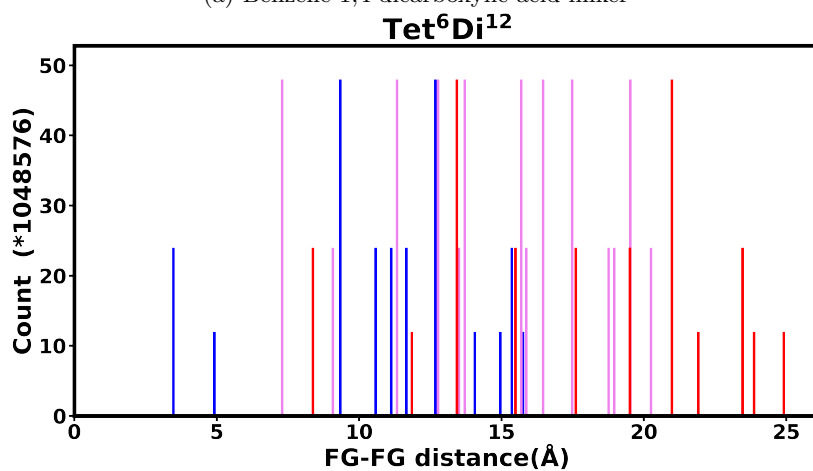

(b) Outer poly(1,4-benzenedicarboxylic acid) linker

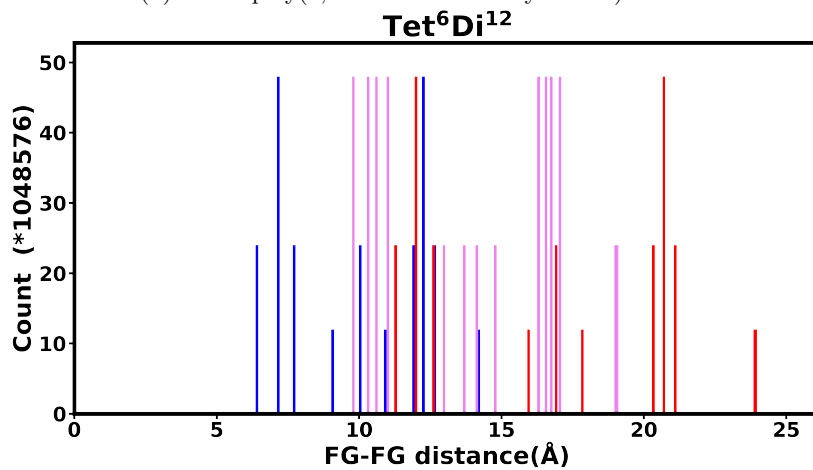

(c) Inner poly(1,4-benzenedicarboxylic acid) linker

Figure S16: Histogram of FG-FG distances in pore *Tet<sup>6</sup>Di<sup>12</sup>*, constructed from a node with radius 5Å and two different linker sizes, (a) benzene-1,4-dicarboxylic acid, (b) poly(1,4-benzenedicarboxylic acid) outer functional group positions (c) poly(1,4-benzenedicarboxylic acid) inner functional group positions.

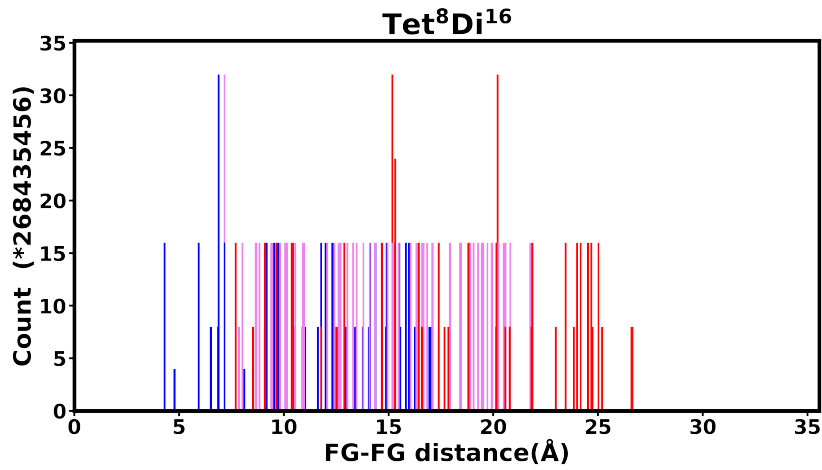

(a) Benzene-1,4-dicarboxylic acid linker

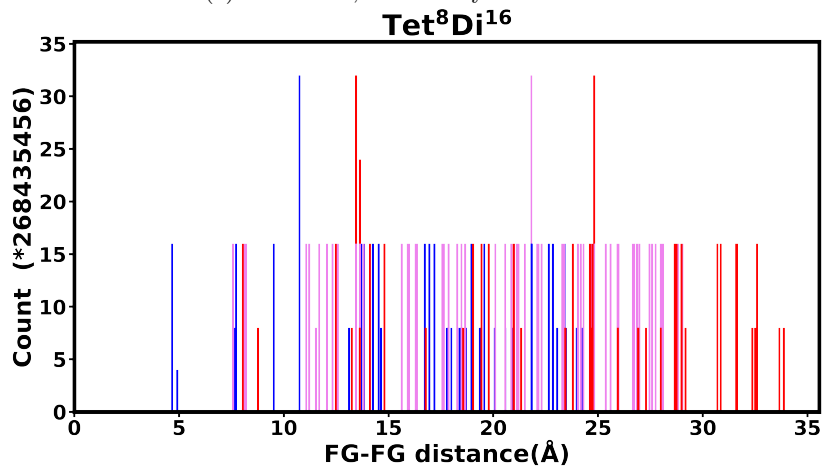

(b) Outer poly(1,4-benzenedicarboxylic acid) linker

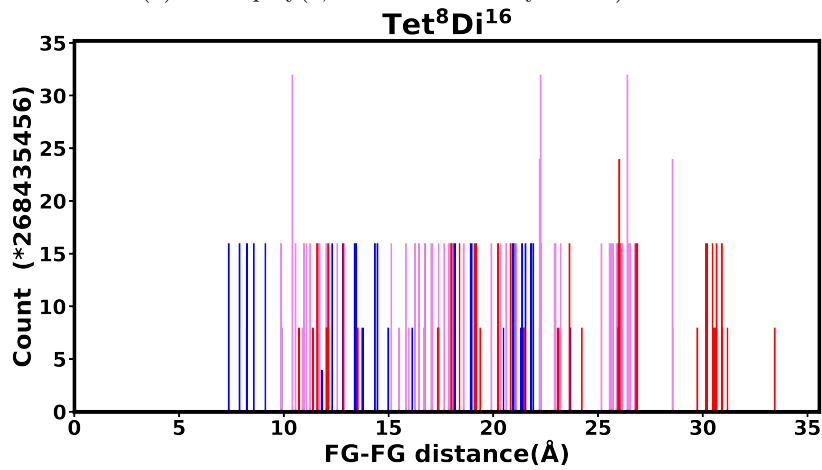

(c) Inner poly(1,4-benzenedicarboxylic acid) linker

Figure S17: Histogram of FG-FG distances in pore *Tet<sup>8</sup>Di<sup>16</sup>*, constructed from a node with radius 5Å and two different linker sizes, (a) benzene-1,4-dicarboxylic acid, (b) poly(1,4-benzenedicarboxylic acid) outer functional group positions (c) poly(1,4-benzenedicarboxylic acid) inner functional group positions.

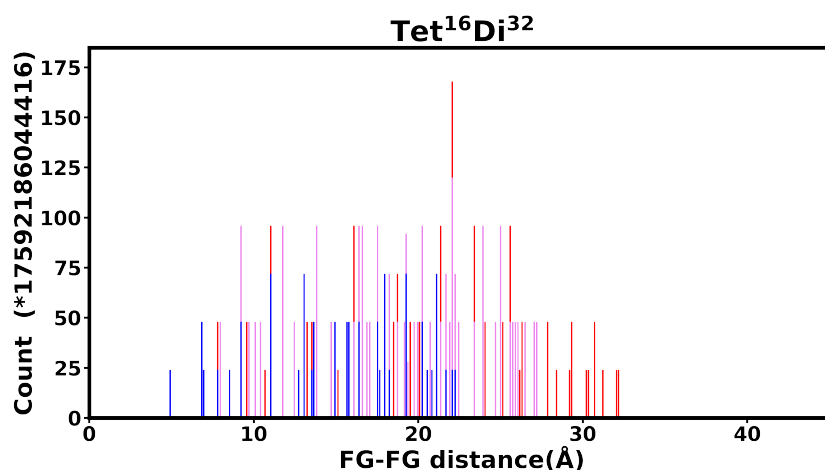

(a) Benzene-1,4-dicarboxylic acid linker

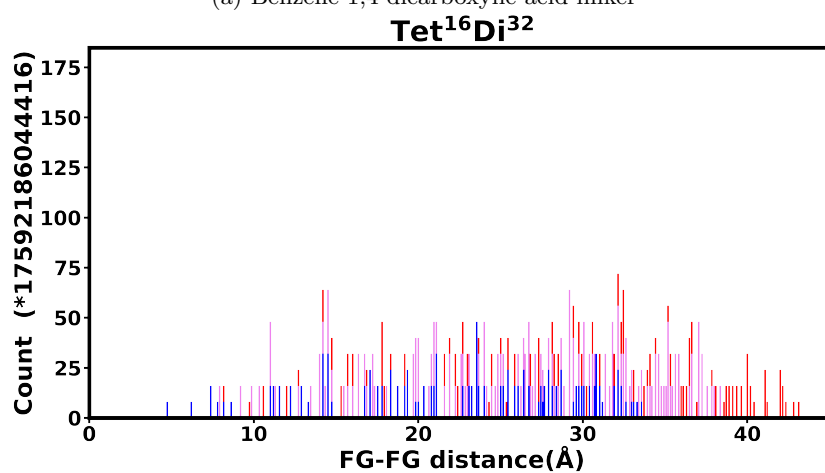

(b) Outer poly(1,4-benzenedicarboxylic acid) linker

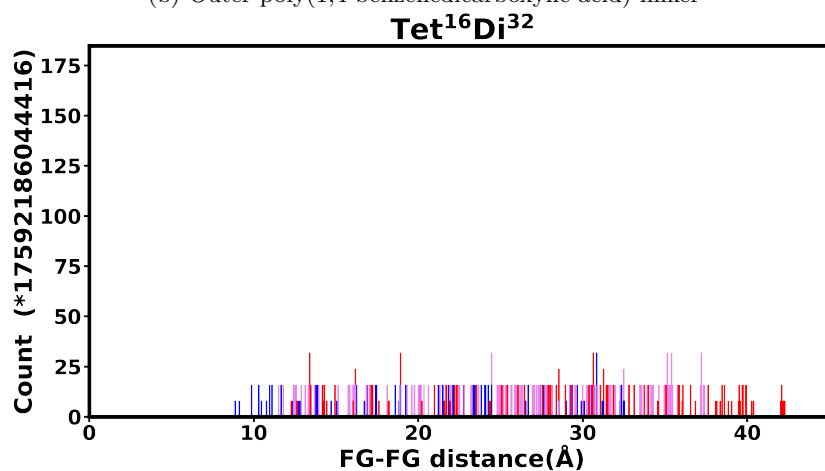

(c) Inner poly(1,4-benzenedicarboxylic acid) linker

Figure S18: Histogram of FG-FG distances in pore  $Tet^{16}Di^{32}$ , constructed from a node with radius  $5\text{\AA}$  and two different linker sizes, (a) benzene-1,4-dicarboxylic acid, (b) poly(1,4-benzenedicarboxylic acid) outer functional group positions (c) poly(1,4-benzenedicarboxylic acid) inner functional group positions.

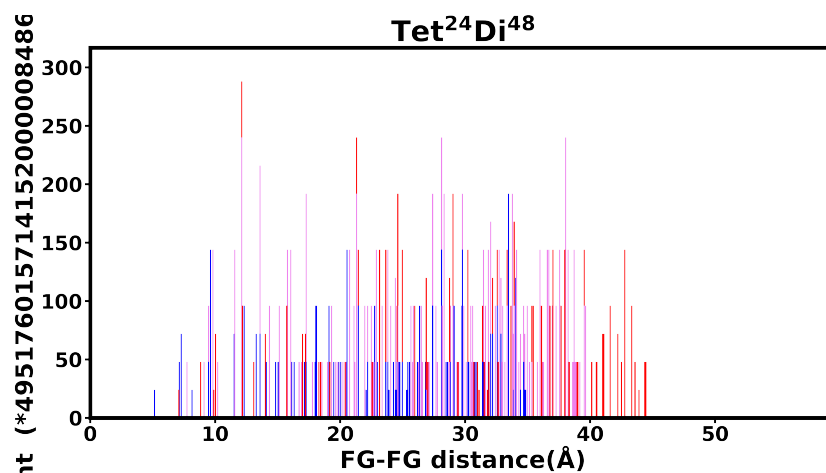

(a) Benzene-1,4-dicarboxylic acid linker

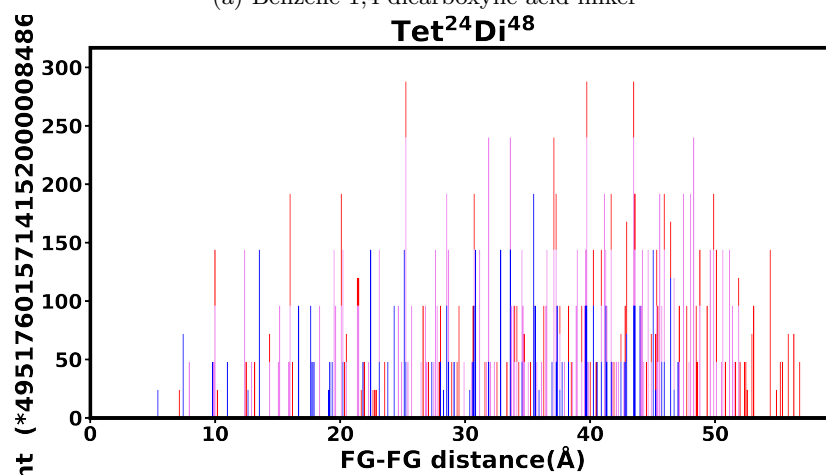

(b) Outer poly(1,4-benzenedicarboxylic acid) linker

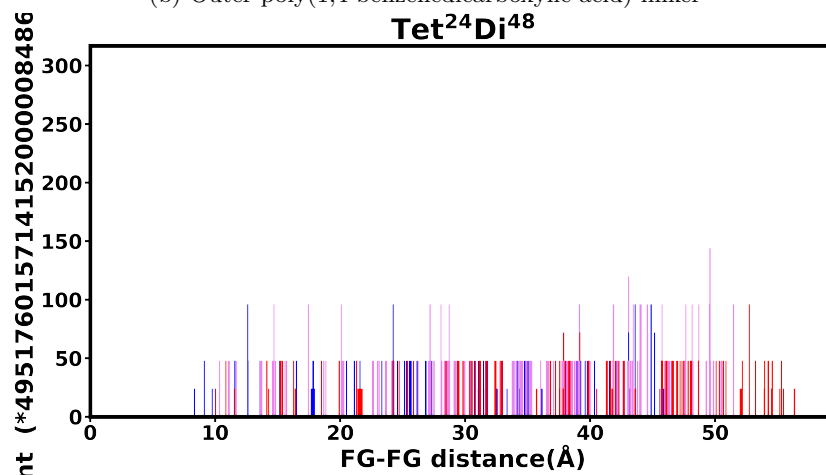

(c) Inner poly(1,4-benzenedicarboxylic acid) linker

Figure S19: Histogram of FG-FG distances in pore *Tet<sup>24</sup>Di<sup>48</sup>*, constructed from a node with radius 5Å and two different linker sizes, (a) benzene-1,4-dicarboxylic acid, (b) poly(1,4-benzenedicarboxylic acid) outer functional group positions (c) poly(1,4-benzenedicarboxylic acid) inner functional group positions.

**S6 Functional Group - Functional Group distance Histogram of  $Tet^2Di^4$  Isomers.**

## S7 The effect of linker rotation on the functional group - functional group distances

| FG-FG dis-<br>tance(Å) | Shortest Dis-<br>tance(Å) | Maximum<br>distance(Å) |
|------------------------|---------------------------|------------------------|
| 3.68                   | 2.44                      | 5.82                   |
| 4.70                   | 3.81                      | 6.52                   |
| 5.20                   | 5.20                      | 6.31                   |
| 5.96                   | 5.96                      | 6.96                   |
| 7.91                   | 6.18                      | 9.32                   |
| 8.43                   | 6.82                      | 9.76                   |
| 10.07                  | 9.80                      | 10.48                  |
| 10.48                  | 10.22                     | 10.88                  |
| 10.57                  | 8.34                      | 11.85                  |
| 10.95                  | 8.83                      | 12.19                  |
| 14.94                  | 14.28                     | 14.94                  |
| 15.22                  | 14.57                     | 15.22                  |

Table S2: Distances found in  $Tet^2Di^4$  pore. The linker rotation deviates the distances from its symmetric position, the maximum and minimum distance is tabulated. Colour code blue represents In-In distances, violet In-out distances, red out-out distances.

| FG-FG dis-<br>tance(Å) | Shortest Dis-<br>tance(Å) | Maximum<br>distance(Å) |
|------------------------|---------------------------|------------------------|
| 3.14                   | 2.39                      | 4.79                   |
| 5.26                   | 4.63                      | 6.75                   |
| 6.08                   | 5.33                      | 7.73                   |
| 6.84                   | 6.75                      | 8.09                   |
| 7.41                   | 6.13                      | 8.39                   |
| 8.51                   | 7.27                      | 9.63                   |
| 9.63                   | 8.40                      | 10.49                  |
| 10.02                  | 8.33                      | 10.78                  |
| 10.09                  | 8.80                      | 11.13                  |
| 11.54                  | 11.11                     | 12.09                  |
| 11.73                  | 10.08                     | 12.47                  |
| 12.90                  | 11.21                     | 13.66                  |
| 16.33                  | 15.55                     | 16.35                  |

Table S3: Distances found in  $Tri^4Di^6$  pore. The linker rotation deviates the distances from its symmetric position, the maximum and minimum distance is tabulated. Distances are colour-coded: blue represents In-In distances, violet In-out distances, red out-out distances.

| FG-FG dis-<br>tance(Å) | Shortest Dis-<br>tance(Å) | Maximum<br>distance(Å) |
|------------------------|---------------------------|------------------------|
| 3.43                   | 2.01                      | 4.15                   |
| 4.85                   | 4.85                      | 5.86                   |
| 5.46                   | 4.24                      | 5.59                   |
| 6.3                    | 4.88                      | 8.38                   |
| 7.17                   | 7.17                      | 8.01                   |
| 7.29                   | 5.57                      | 8.5                    |
| 7.95                   | 7.22                      | 9.92                   |
| 8.37                   | 6.29                      | 9.79                   |
| 8.44                   | 6.71                      | 9.81                   |
| 8.54                   | 8.24                      | 9.003                  |
| 8.91                   | 8.91                      | 9.7                    |
| 9.05                   | 8.82                      | 9.26                   |
| 9.24                   | 7.57                      | 10.6                   |
| 9.54                   | 9.54                      | 10.87                  |
| 9.73                   | 9.73                      | 10.68                  |
| 9.76                   | 7.94                      | 11.15                  |
| 10.12                  | 8.12                      | 11.5                   |
| 10.14                  | 10.14                     | 11.06                  |
| 10.48                  | 10.28                     | 10.71                  |
| 11.24                  | 9.16                      | 12.66                  |
| 11.75                  | 11.75                     | 13.11                  |
| 11.84                  | 11.37                     | 11.84                  |
| 12.35                  | 11.11                     | 13.6                   |
| 12.75                  | 11.8                      | 13.81                  |
| 12.89                  | 12.66                     | 13.11                  |
| 13.29                  | 12.31                     | 14.28                  |
| 13.95                  | 13.25                     | 14.72                  |
| 14.02                  | 13.55                     | 14.02                  |
| 14.67                  | 14.39                     | 14.87                  |
| 14.95                  | 14.68                     | 15.15                  |
| 15.9                   | 15.43                     | 15.9                   |
| 16.33                  | 14.6                      | 16.69                  |
| 17.05                  | 15.5                      | 17.4                   |
| 17.97                  | 18.27                     | 16.66                  |
| 19.61                  | 18.95                     | 19.61                  |
| 19.82                  | 19.33                     | 19.82                  |

Table S4: Distances found in  $Tet^6Di^{12}$  pore. The linker rotation deviates the distances from its symmetric position, the maximum and minimum distance is tabulated. Colour code blue represents In-In distances, violet In-out distances, red out-out distances.



## S8 Kernel Density Estimation on the Histograms

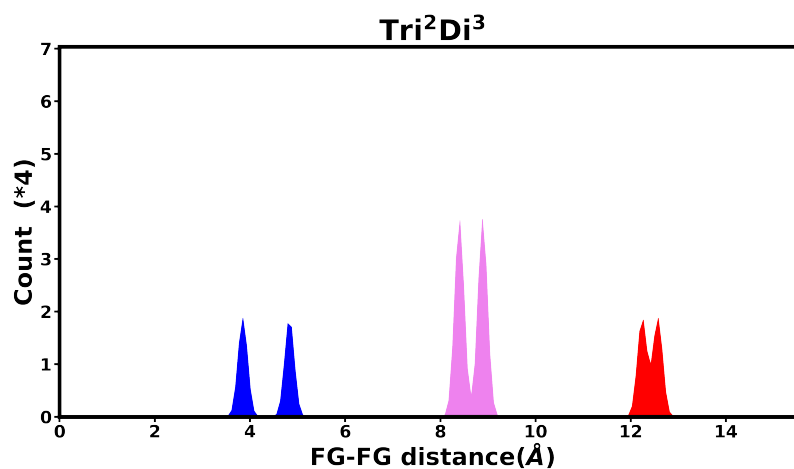

(a) Benzene-1,4-dicarboxylic acid linker

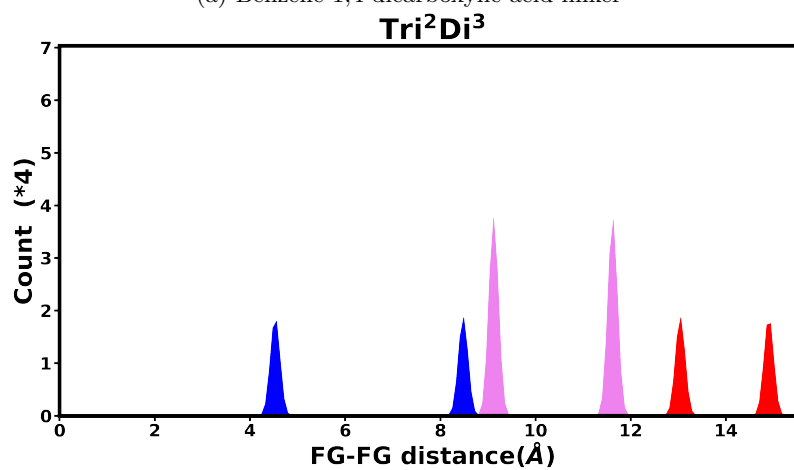

(b) Outer poly(1,4-benzenedicarboxylic acid) linker

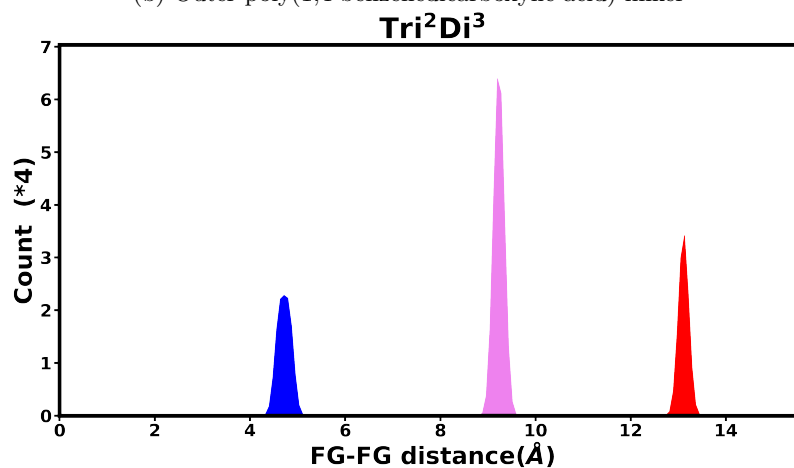

(c) Inner poly(1,4-benzenedicarboxylic acid) linker

Figure S20: KDE applied on FG-FG distance histograms of pore *Tri<sup>2</sup>Di<sup>3</sup>*, constructed from a node with radius 5 Å and two different linker sizes, (a) benzene-1,4-dicarboxylic acid, (b) poly(1,4-benzenedicarboxylic acid) outer functional group positions (c) poly(1,4-benzenedicarboxylic acid) inner functional group positions.

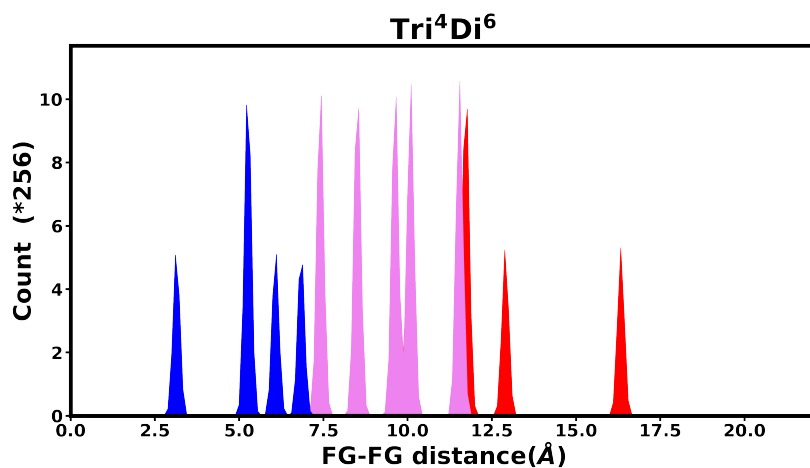

(a) Benzene-1,4-dicarboxylic acid linker

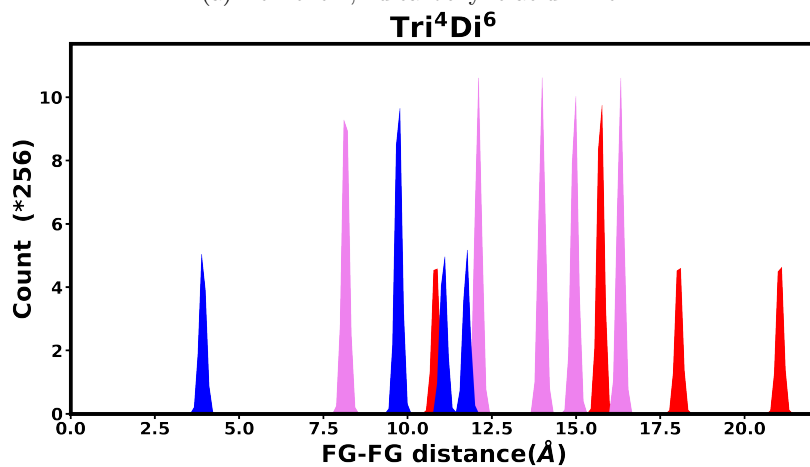

(b) Outer poly(1,4-benzenedicarboxylic acid) linker

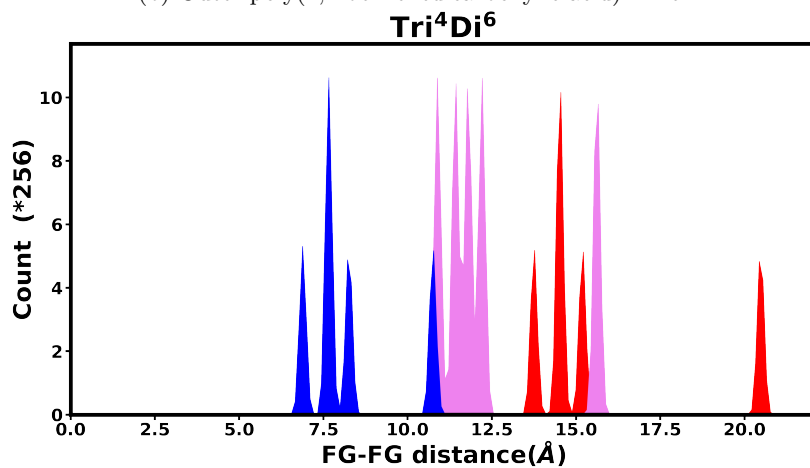

(c) Inner poly(1,4-benzenedicarboxylic acid) linker

Figure S21: KDE applied on FG-FG distance histograms of pore  $Tri^4Di^6$ , constructed from a node with radius  $5\text{\AA}$  and two different linker size, (a) benzene-1,4-dicarboxylic acid, (b) poly(1,4-benzenedicarboxylic acid) outer functional group positions (c) poly(1,4-benzenedicarboxylic acid) inner functional group positions.

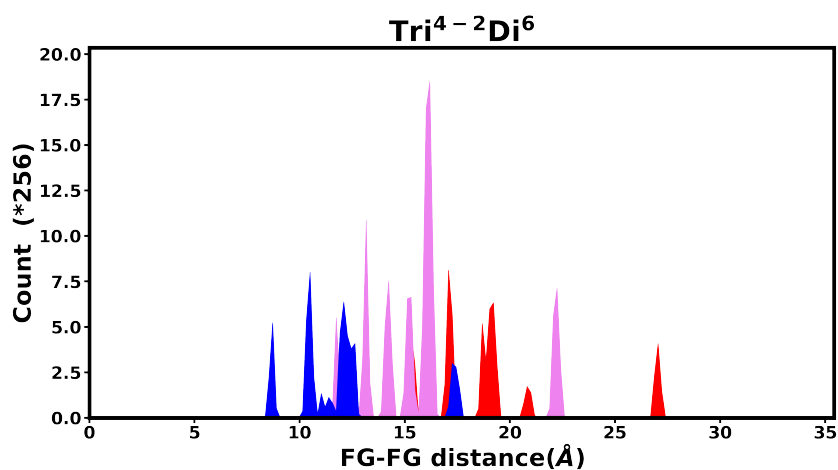

(a) Benzene-1,4-dicarboxylic acid linker

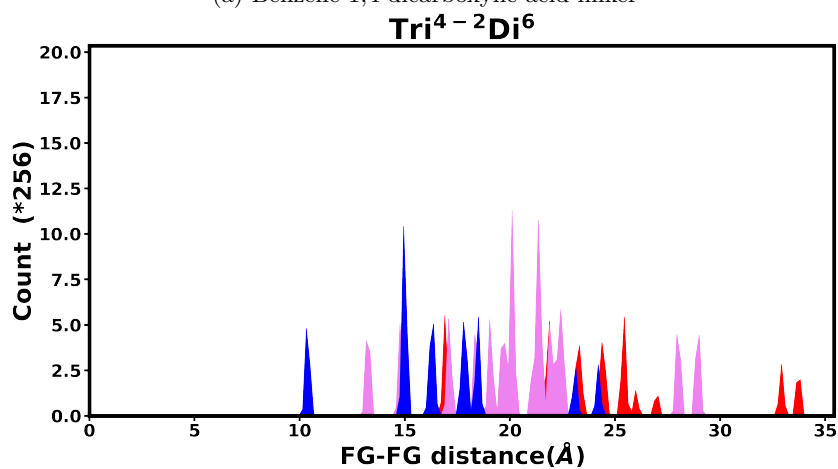

(b) Outer poly(1,4-benzenedicarboxylic acid) linker

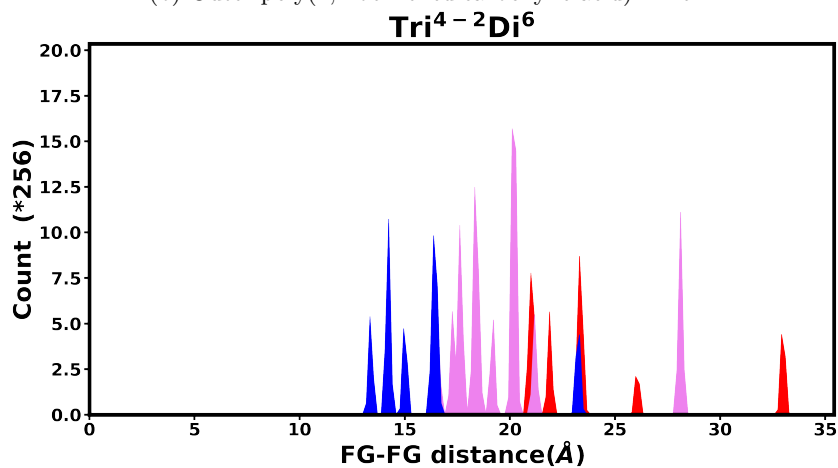

(c) Inner poly(1,4-benzenedicarboxylic acid) linker

Figure S22: KDE applied on FG-FG distance histograms of pore  $Tri_2^4Di^6$ , constructed from a node with radius  $5\text{\AA}$  and two different linker size, (a) benzene-1,4-dicarboxylic acid, (b) poly(1,4-benzenedicarboxylic acid) outer functional group positions (c) poly(1,4-benzenedicarboxylic acid) inner functional group positions.

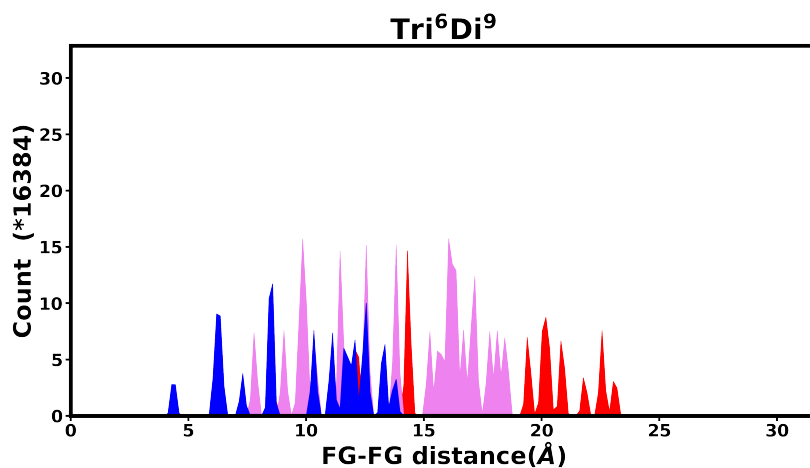

(a) Benzene-1,4-dicarboxylic acid linker

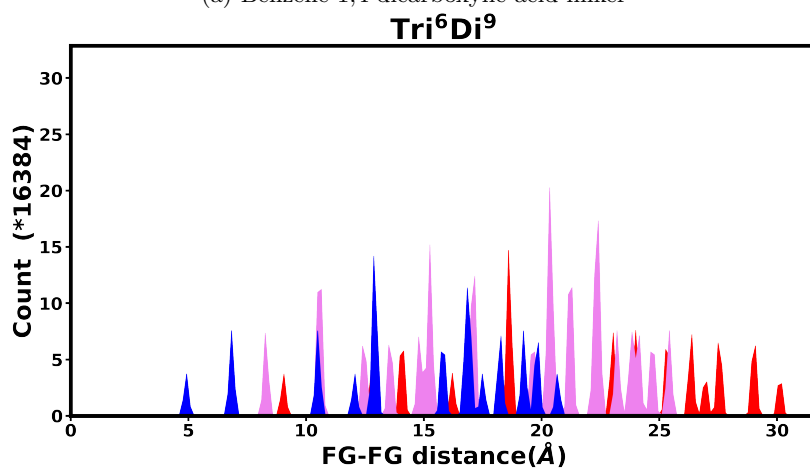

(b) Outer poly(1,4-benzenedicarboxylic acid) linker

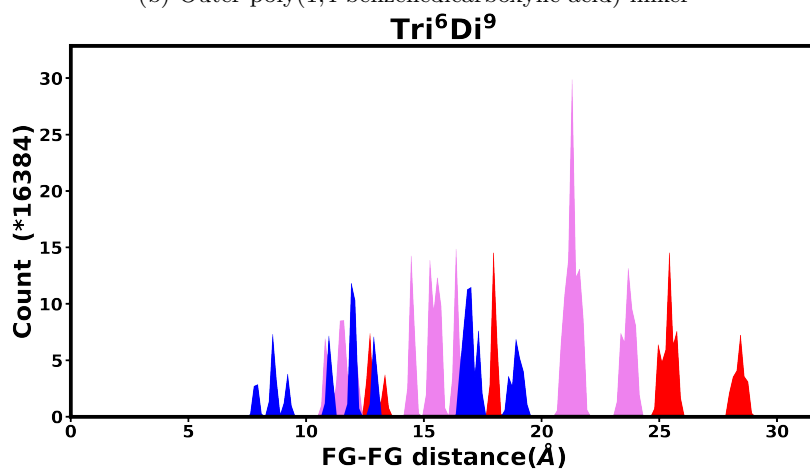

(c) Inner poly(1,4-benzenedicarboxylic acid) linker

Figure S23: KDE applied on FG-FG distance histograms of pore *Tri<sup>6</sup>Di<sup>9</sup>*, constructed from a node with radius 5 Å and two different linker sizes, (a) benzene-1,4-dicarboxylic acid, (b) poly(1,4-benzenedicarboxylic acid) outer functional group positions (c) poly(1,4-benzenedicarboxylic acid) inner functional group positions.

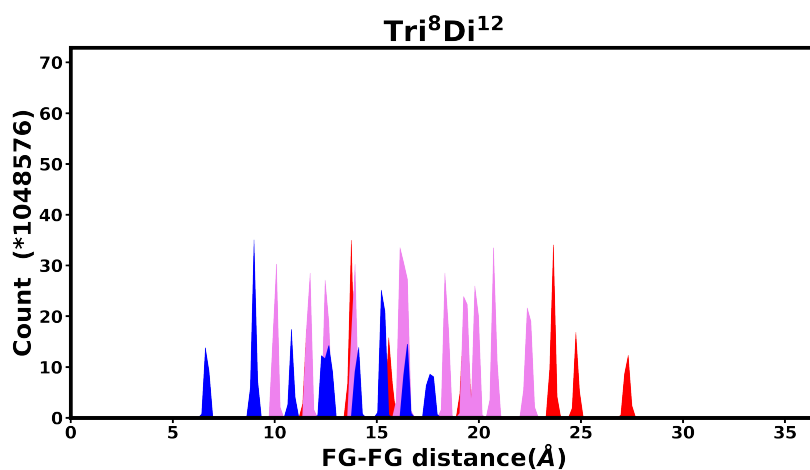

(a) Benzene-1,4-dicarboxylic acid linker

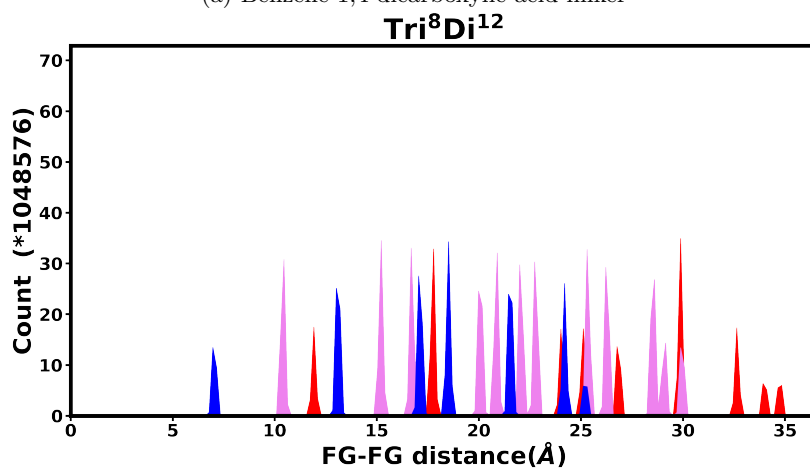

(b) Outer poly(1,4-benzenedicarboxylic acid) linker

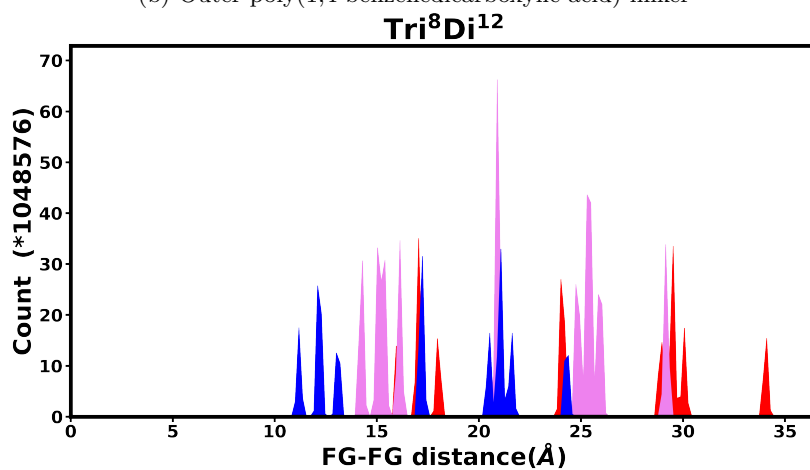

(c) Inner poly(1,4-benzenedicarboxylic acid) linker

Figure S24: KDE applied on FG-FG distance histograms of pore *Tri<sup>8</sup>Di<sup>12</sup>*, constructed from a node with radius 5 Å and two different linker sizes, (a) benzene-1,4-dicarboxylic acid, (b) poly(1,4-benzenedicarboxylic acid) outer functional group positions (c) poly(1,4-benzenedicarboxylic acid) inner functional group positions.

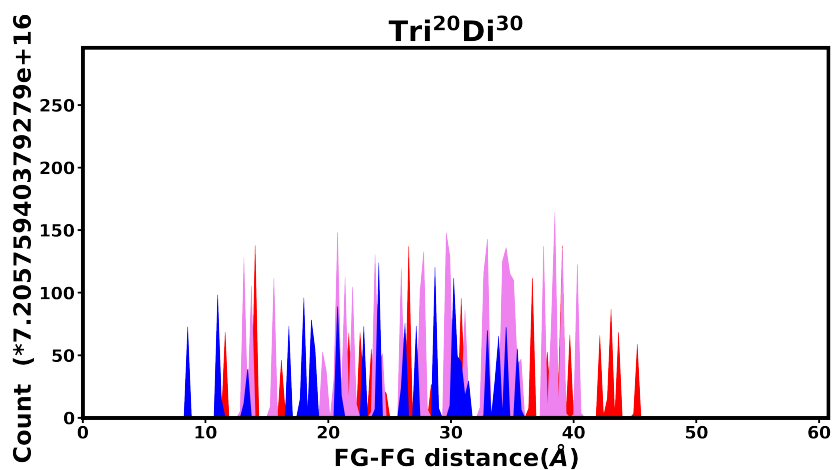

(a) Benzene-1,4-dicarboxylic acid linker

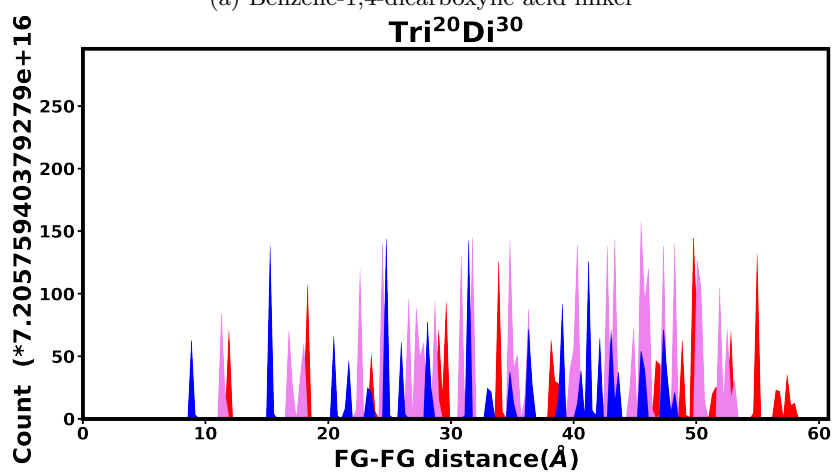

(b) Outer poly(1,4-benzenedicarboxylic acid) linker

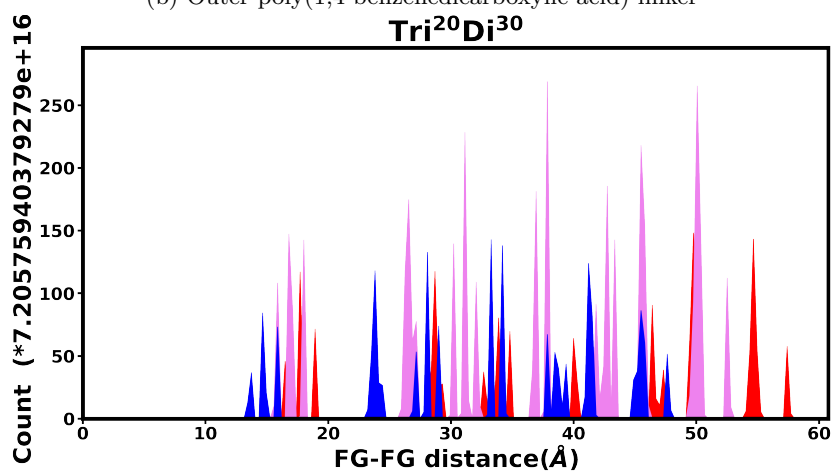

(c) Inner poly(1,4-benzenedicarboxylic acid) linker

Figure S25: KDE applied on FG-FG distance histograms of pore  $Tri^{20}Di^{30}$ , constructed from a node with radius  $5\text{\AA}$  and two different linker sizes, (a) benzene-1,4-dicarboxylic acid, (b) poly(1,4-benzenedicarboxylic acid) outer functional group positions (c) poly(1,4-benzenedicarboxylic acid) inner functional group positions.

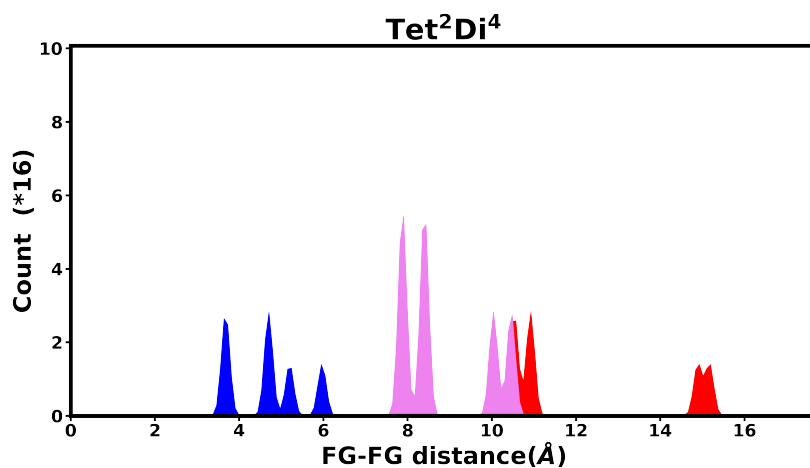

(a) Benzene-1,4-dicarboxylic acid linker

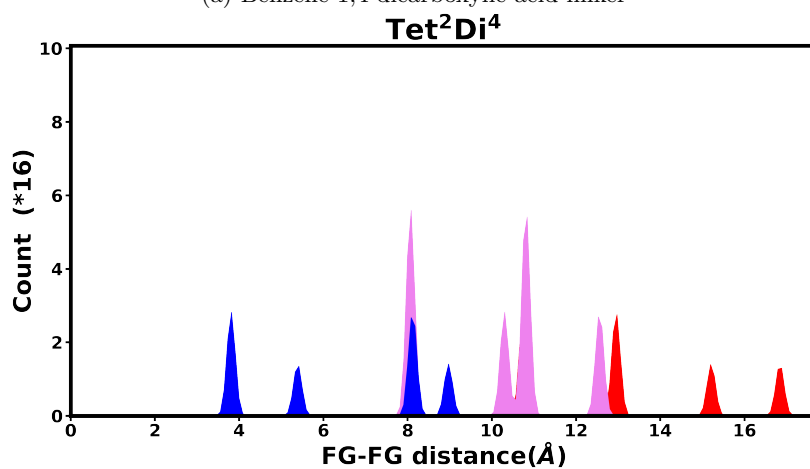

(b) Outer poly(1,4-benzenedicarboxylic acid) linker

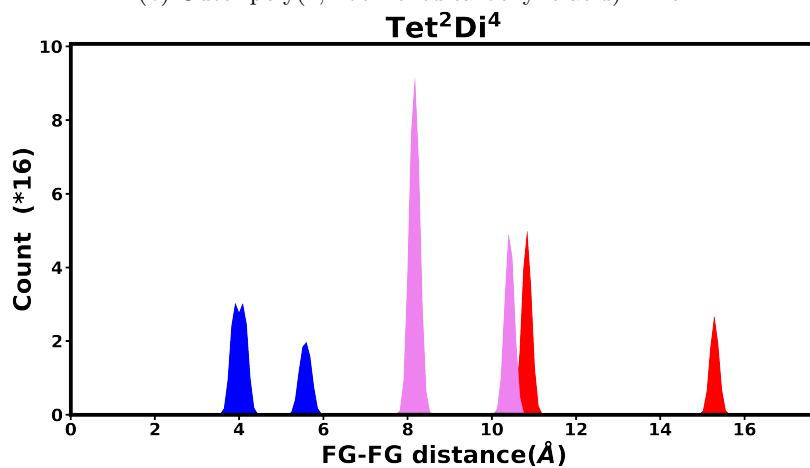

(c) Inner poly(1,4-benzenedicarboxylic acid) linker

Figure S26: KDE applied on FG-FG distance histograms of pore  $Tet^2Di^4$ , constructed from a node with radius  $5\text{\AA}$  and two different linker sizes, (a) benzene-1,4-dicarboxylic acid, (b) poly(1,4-benzenedicarboxylic acid) outer functional group positions (c) poly(1,4-benzenedicarboxylic acid) inner functional group positions.

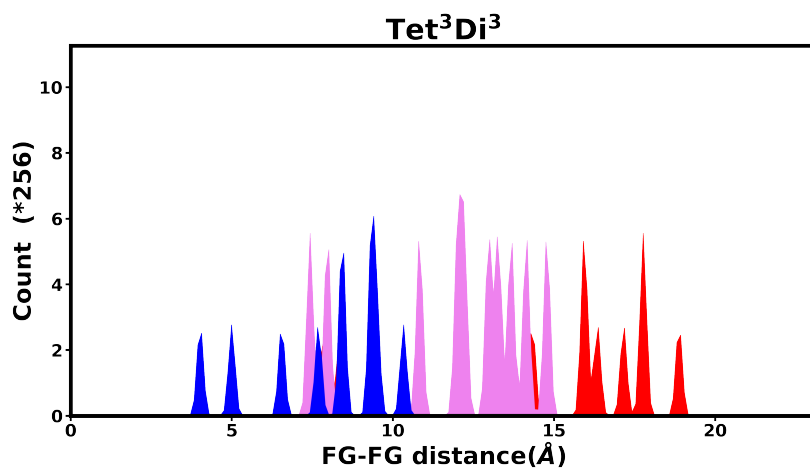

(a) Benzene-1,4-dicarboxylic acid linker

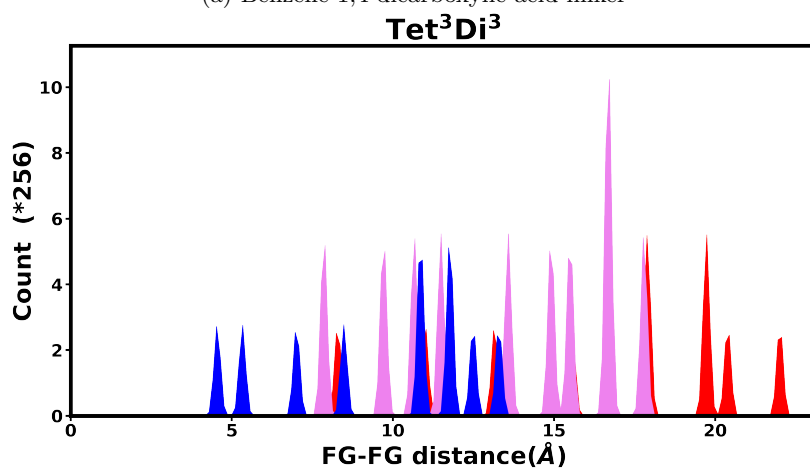

(b) Outer poly(1,4-benzenedicarboxylic acid) linker

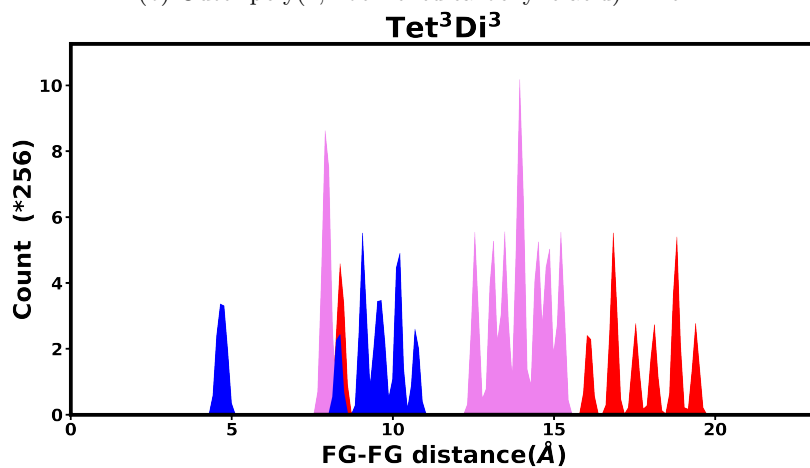

(c) Inner poly(1,4-benzenedicarboxylic acid) linker

Figure S27: KDE applied on FG-FG distance histograms of pore  $Tet_2^3Di^3$ , constructed from a node with radius  $5\text{\AA}$  and two different linker sizes, (a) benzene-1,4-dicarboxylic acid, (b) poly(1,4-benzenedicarboxylic acid) outer functional group positions (c) poly(1,4-benzenedicarboxylic acid) inner functional group positions.



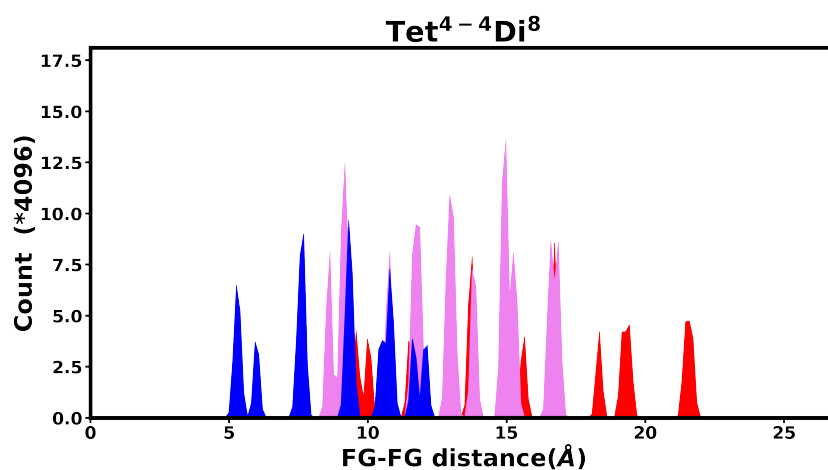

(a) Benzene-1,4-dicarboxylic acid linker

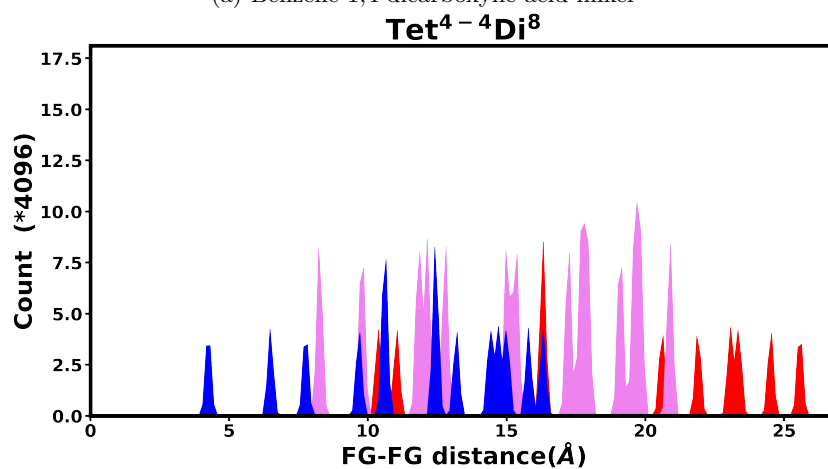

(b) Outer poly(1,4-benzenedicarboxylic acid) linker

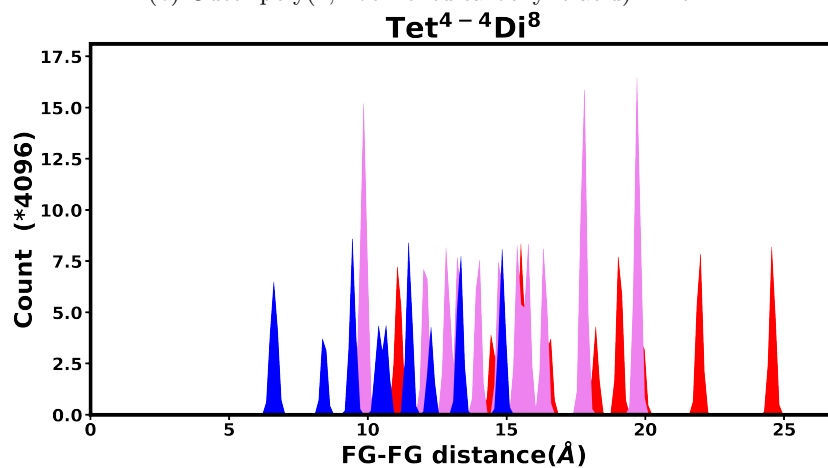

(c) Inner poly(1,4-benzenedicarboxylic acid) linker

Figure S28: KDE applied on FG-FG distance histograms of pore  $Tet_4Di_8$ , constructed from a node with radius  $5\text{\AA}$  and two different linker sizes, (a) benzene-1,4-dicarboxylic acid, (b) poly(1,4-benzenedicarboxylic acid) outer functional group positions (c) poly(1,4-benzenedicarboxylic acid) inner functional group positions.

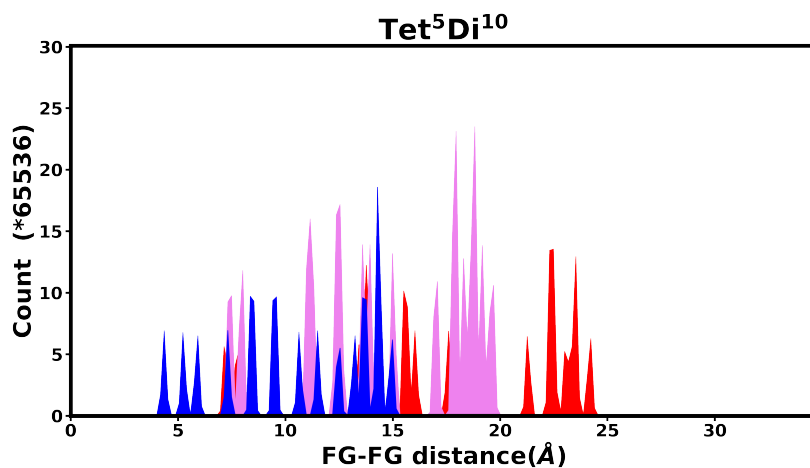

(a) Benzene-1,4-dicarboxylic acid linker

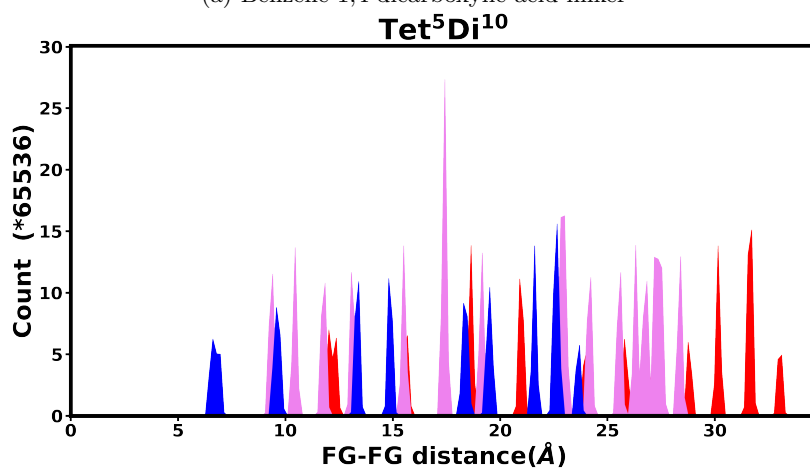

(b) Outer poly(1,4-benzenedicarboxylic acid) linker

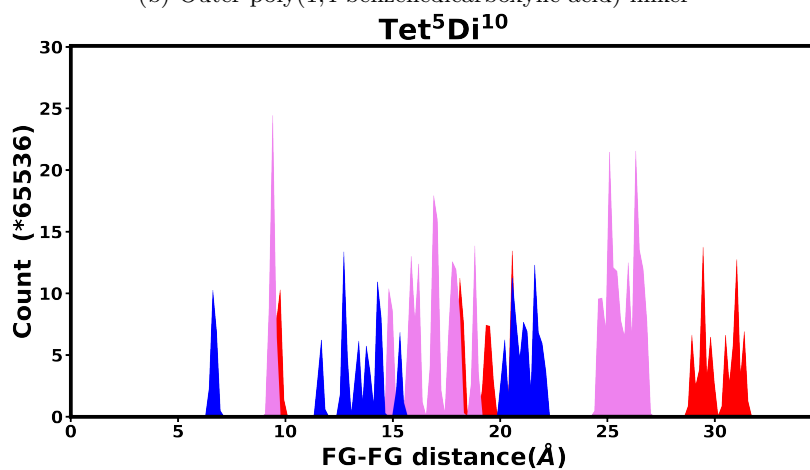

(c) Inner poly(1,4-benzenedicarboxylic acid) linker

Figure S29: KDE applied on FG-FG distance histograms of pore *Tet<sup>5</sup>Di<sup>10</sup>*, constructed from a node with radius 5 Å and two different linker sizes, (a) benzene-1,4-dicarboxylic acid, (b) poly(1,4-benzenedicarboxylic acid) outer functional group positions (c) poly(1,4-benzenedicarboxylic acid) inner functional group positions.

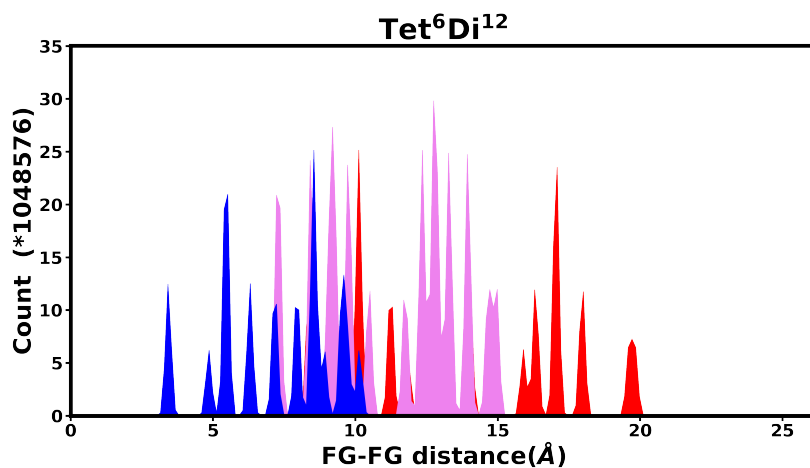

(a) Benzene-1,4-dicarboxylic acid linker

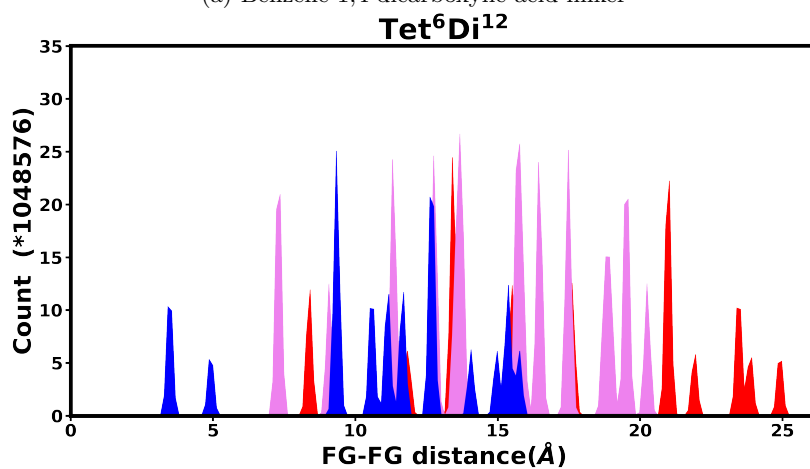

(b) Outer poly(1,4-benzenedicarboxylic acid) linker

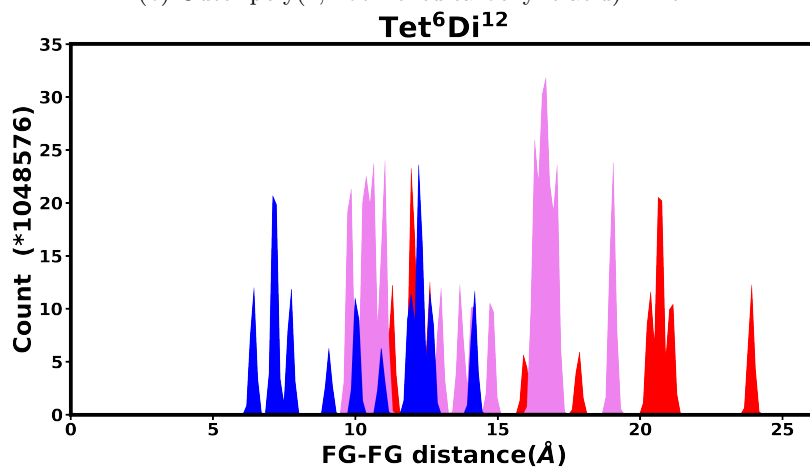

(c) Inner poly(1,4-benzenedicarboxylic acid) linker

Figure S30: KDE applied on FG-FG distance histograms of pore  $Tet^6Di^{12}$ , constructed from a node with radius  $5\text{\AA}$  and two different linker sizes, (a) benzene-1,4-dicarboxylic acid, (b) poly(1,4-benzenedicarboxylic acid) outer functional group positions (c) poly(1,4-benzenedicarboxylic acid) inner functional group positions.

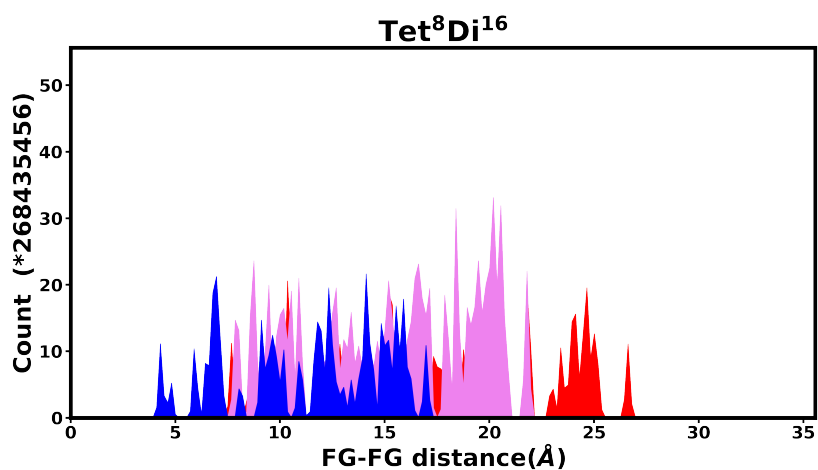

(a) Benzene-1,4-dicarboxylic acid linker

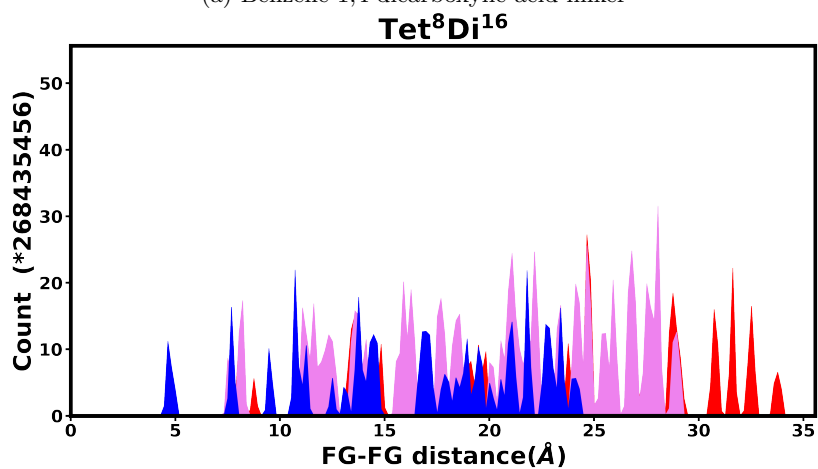

(b) Outer poly(1,4-benzenedicarboxylic acid) linker

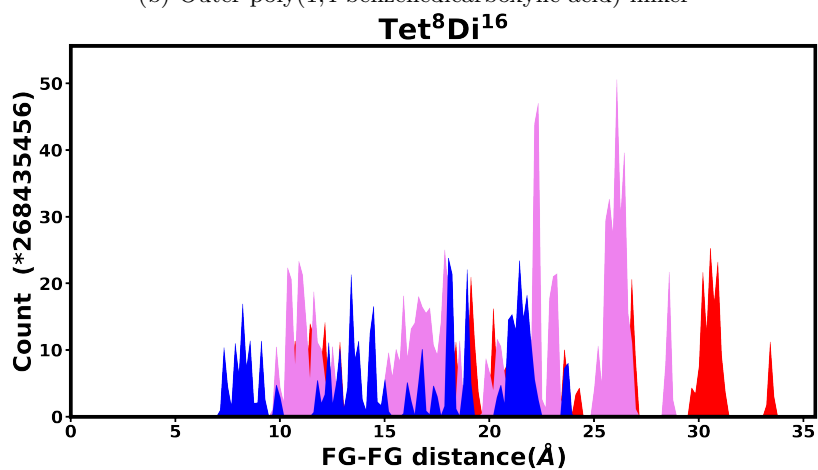

(c) Inner poly(1,4-benzenedicarboxylic acid) linker

Figure S31: KDE applied on FG-FG distance histograms of pore *Tet<sup>8</sup>Di<sup>16</sup>*, constructed from a node with radius 5Å and two different linker sizes, (a) benzene-1,4-dicarboxylic acid, (b) poly(1,4-benzenedicarboxylic acid) outer functional group positions (c) poly(1,4-benzenedicarboxylic acid) inner functional group positions.

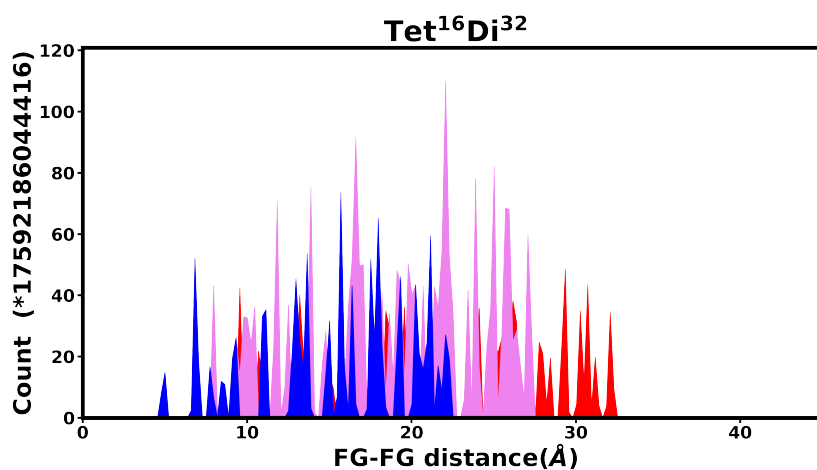

(a) Benzene-1,4-dicarboxylic acid linker

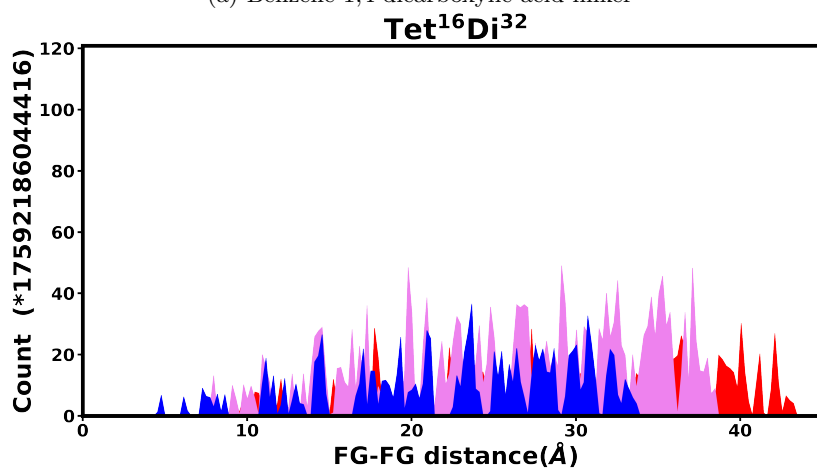

(b) Outer poly(1,4-benzenedicarboxylic acid) linker

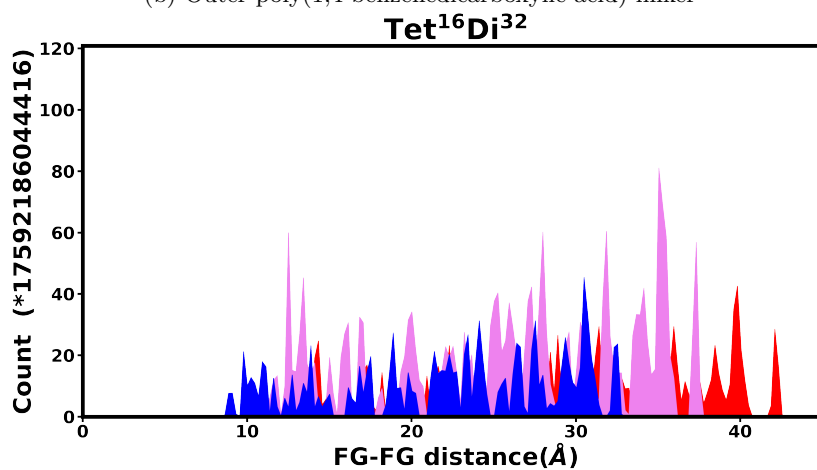

(c) Inner poly(1,4-benzenedicarboxylic acid) linker

Figure S32: KDE applied on FG-FG distance histograms of pore  $Tet^{16}Di^{32}$ , constructed from a node with radius  $5\text{\AA}$  and two different linker sizes, (a) benzene-1,4-dicarboxylic acid, (b) poly(1,4-benzenedicarboxylic acid) outer functional group positions (c) poly(1,4-benzenedicarboxylic acid) inner functional group positions.

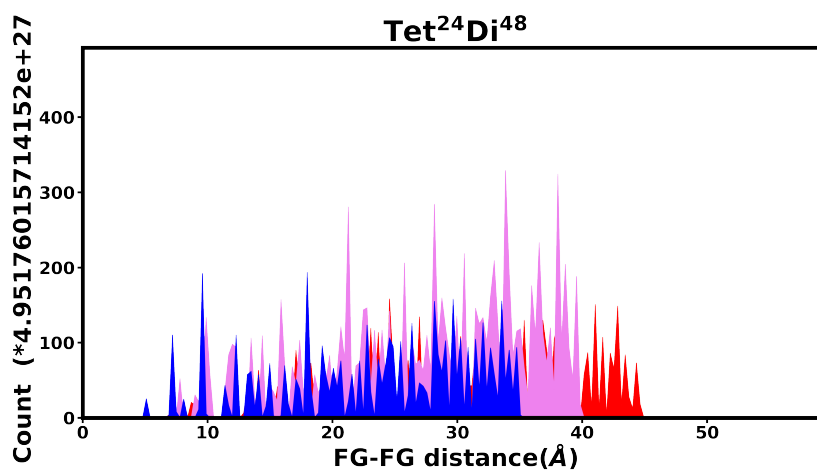

(a) Benzene-1,4-dicarboxylic acid linker

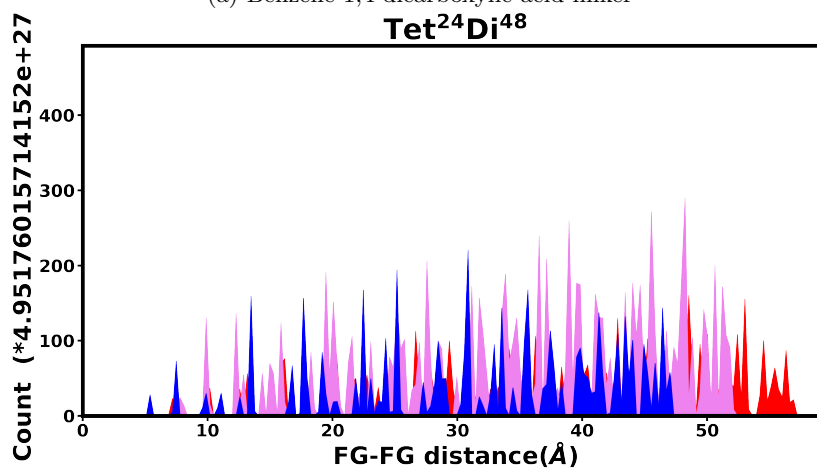

(b) Outer poly(1,4-benzenedicarboxylic acid) linker

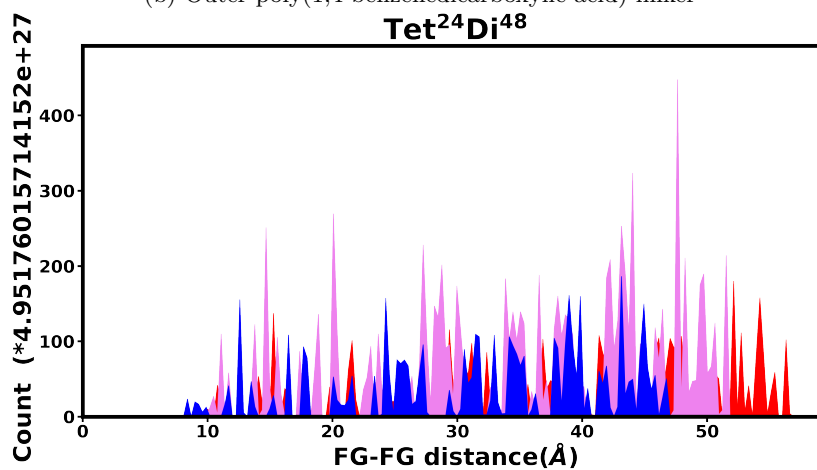

(c) Inner poly(1,4-benzenedicarboxylic acid) linker

Figure S33: KDE applied on FG-FG distance histograms of pore *Tet<sup>24</sup>Di<sup>48</sup>*, constructed from a node with radius 5 Å and two different linker sizes, (a) benzene-1,4-dicarboxylic acid, (b) poly(1,4-benzenedicarboxylic acid) outer functional group positions (c) poly(1,4-benzenedicarboxylic acid) inner functional group positions.

## S9 Principal Component Analysis

**S10 Machine Learning**



**S11 Machine Learning**
